# Supplementary material for: Defining the role of common variation in the genomic and biological architecture of adult human height
Source: Springer Nature journal article supplement (doi:10.1038/ng.3097), 2014-10-05
Supplement: 41588_2014_BFng3097_MOESM4_ESM.pdf [file 41588_2014_BFng3097_MOESM4_ESM.pdf]

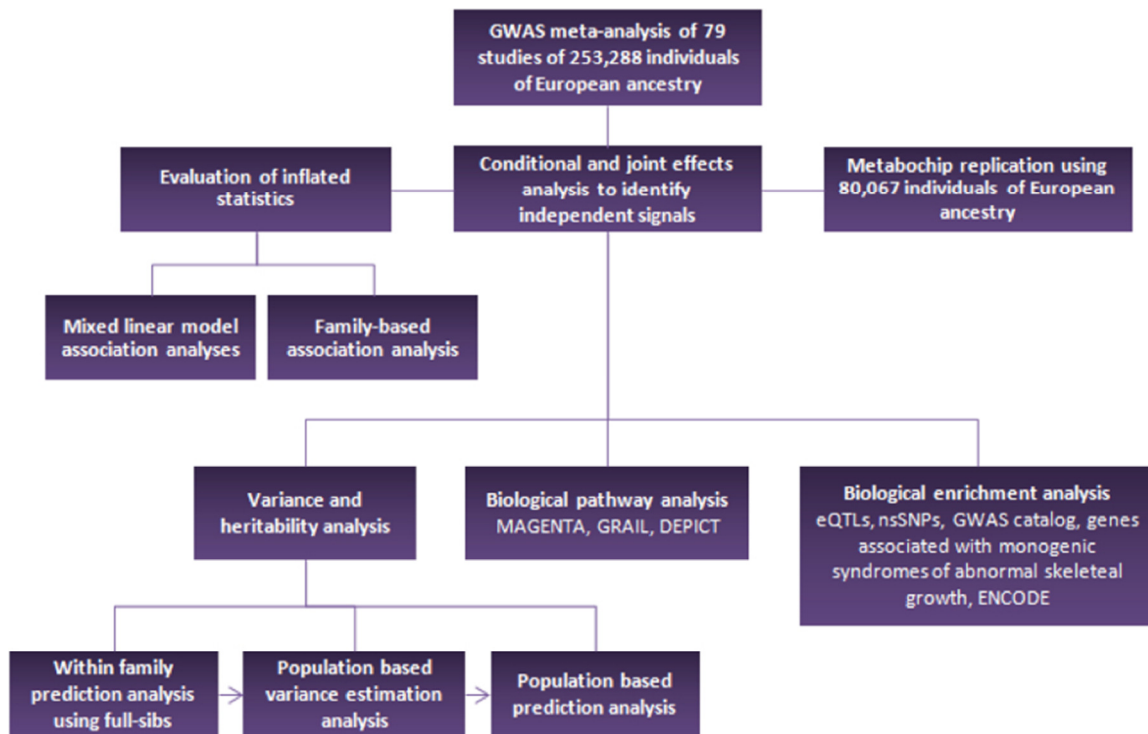

**Supplementary Figure 1**

**Overview of the analysis strategy implemented.**

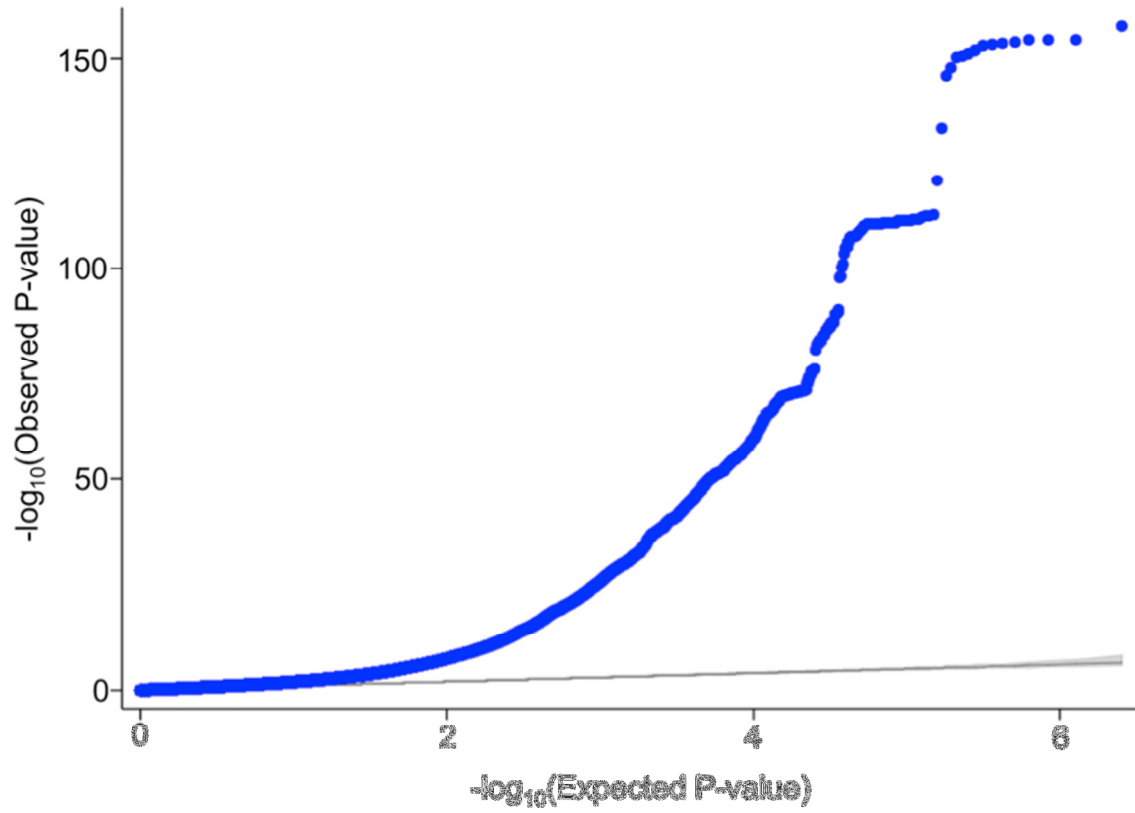

**Supplementary Figure 2**

Quantile-quantile plot showing the  $P$ -value distribution of GWAS meta-analysis results after applying a single genomic control.

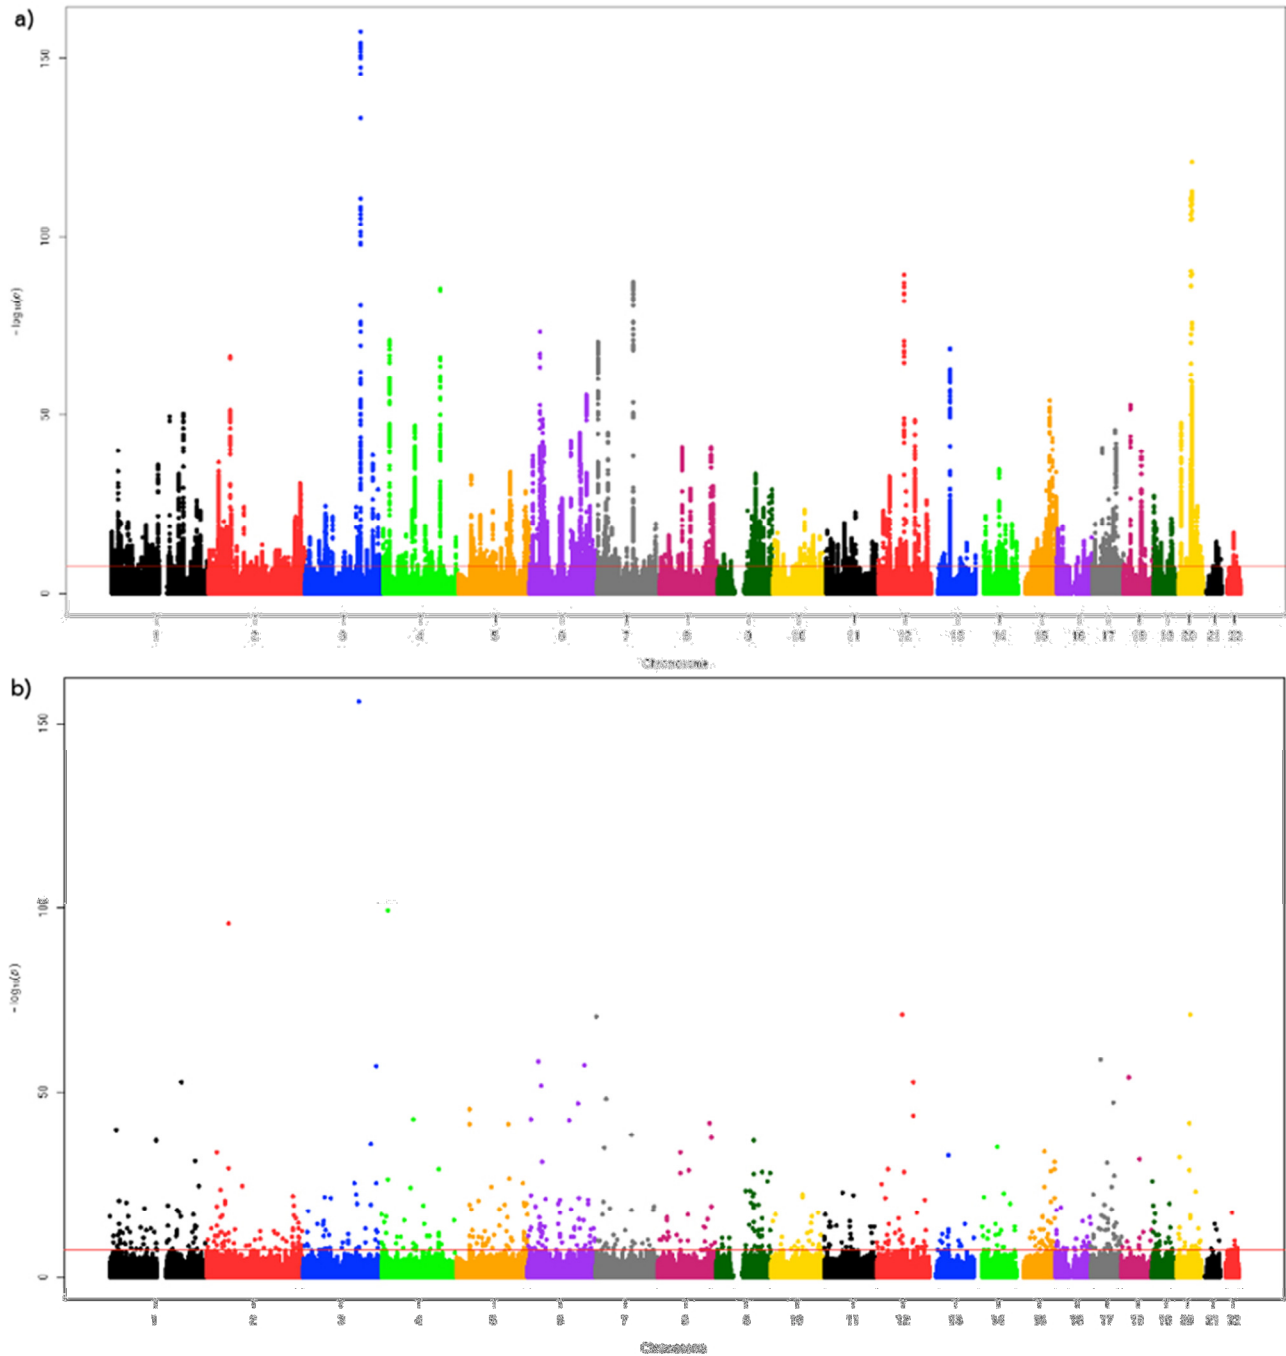

### Supplementary Figure 3

#### Manhattan plots.

Plots of (a) results obtained from meta-analysis after applying a single genomic control correction and (b) results obtained from performing an approximate conditional and joint multiple-SNP analysis on the meta-analysis results. The red horizontal line in both plots represents the genome-wide significance threshold of  $P = 5 \times 10^{-8}$ .

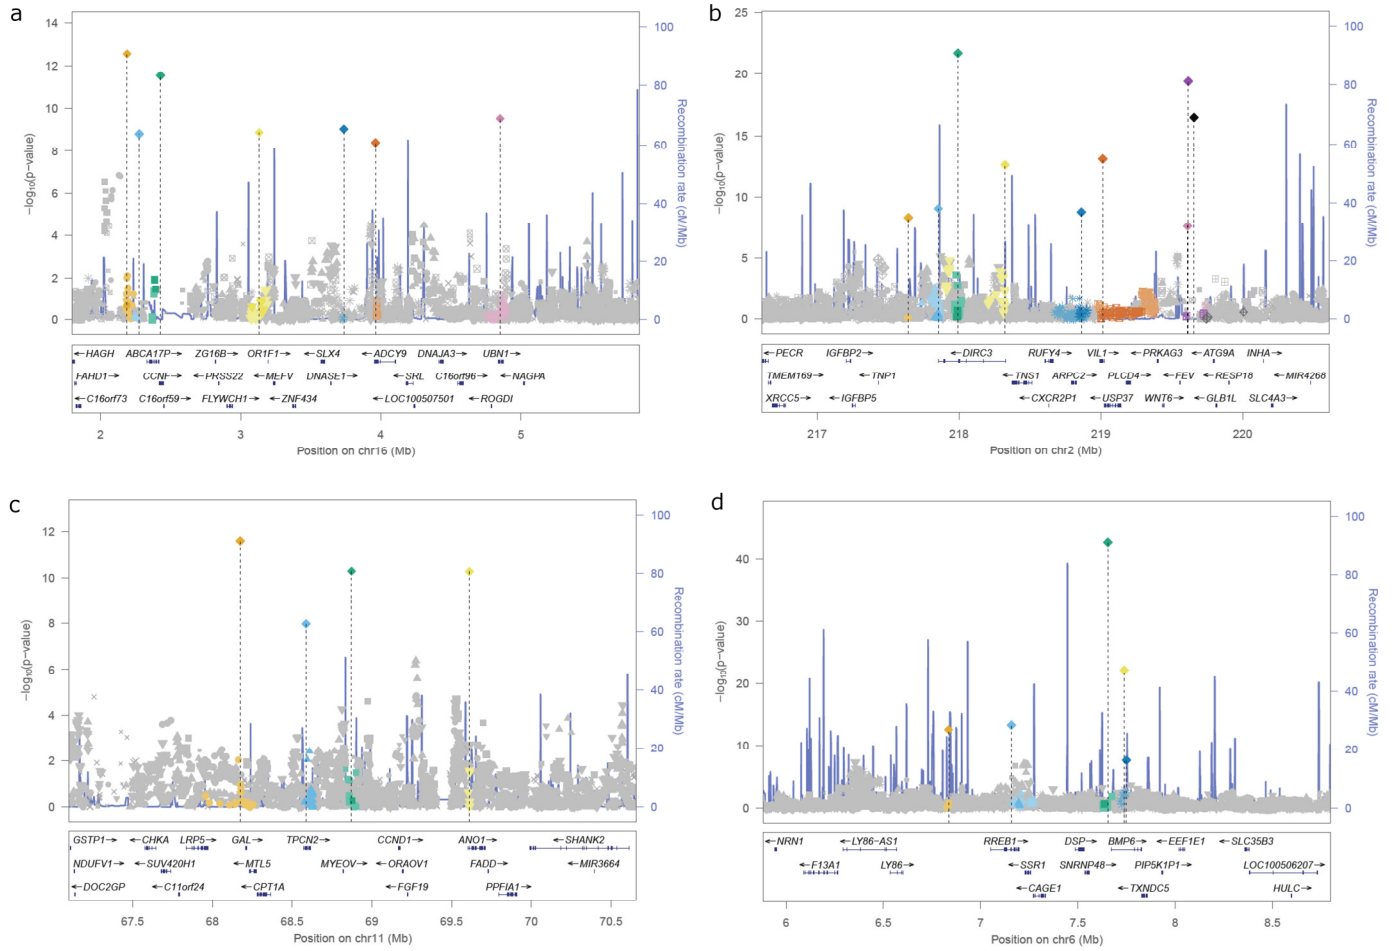

**Supplementary Figure 4**

**Examples of loci with multiple signals that cluster around the same gene or are in close proximity to others.**

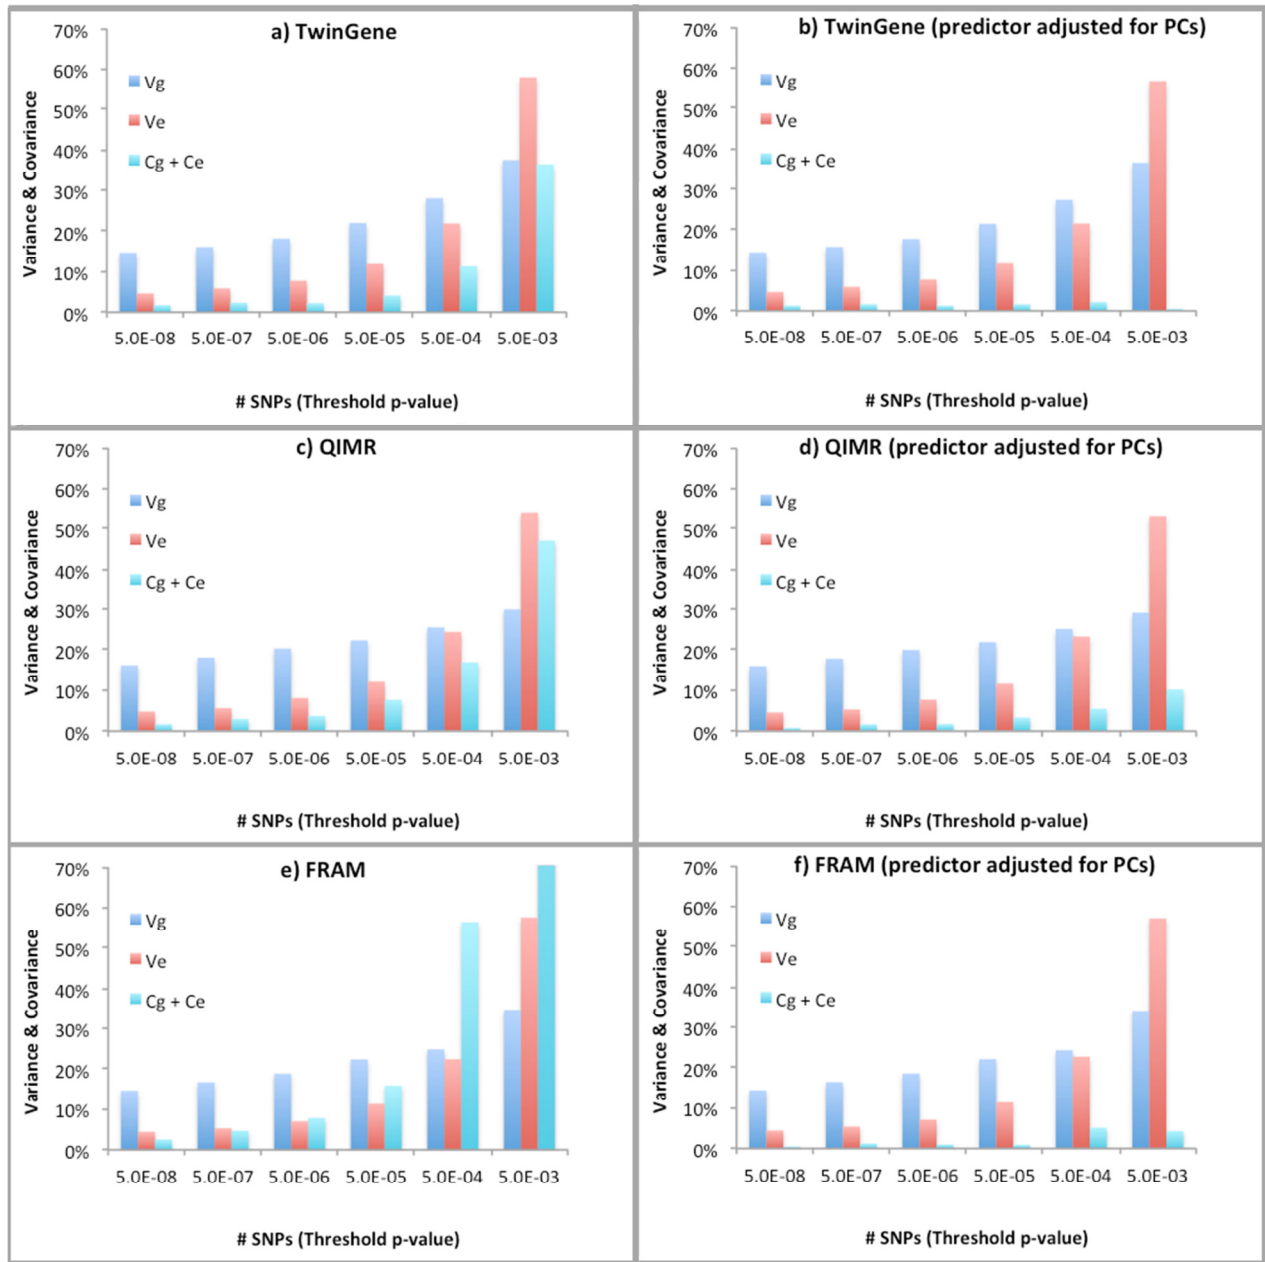

**Supplementary Figure 5**

**Partitioning the variance in the SNP-derived genetic predictor using a within-family analysis.**

The variance of the SNP-based genetic predictor was partitioned into components due to real SNP effects ( $V_g$ ), errors in estimating SNP effects ( $V_e$ ) and population stratification ( $C_g + C_e$ ) (Online Methods). The SNPs were selected from the approximate conditional and joint multiple-SNP association analysis with the target cohort being excluded from the meta-analysis. In **b**, **d** and **f**, the SNP-based predictor was adjusted by the first 20 principal components (PCs). The comparison between the results with and without PC adjustment demonstrates clearly the partitioning of the variance component due to population stratification ( $C_g + C_e$ ).

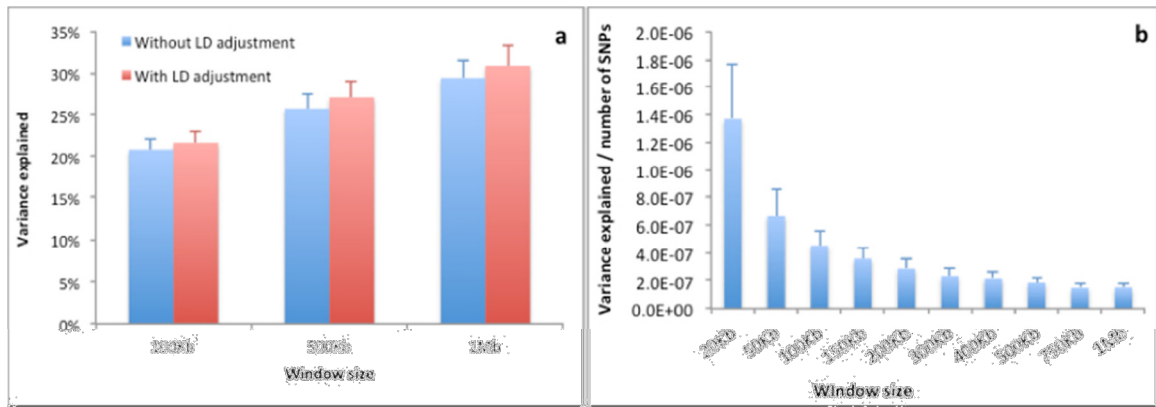

### Supplementary Figure 6

#### Variance explained by the SNPs at known loci.

Details of data and analyses can be found in the Online Methods. **(a)** Variance explained by all the SNPs within a certain physical distance of the top associated SNPs (including the top SNPs). **(b)** Variance explained by the SNPs at the known loci excluding the top SNPs divided by the number of these SNPs. Estimates in **b** are without LD adjustment. Error bars are the standard errors of the estimates.

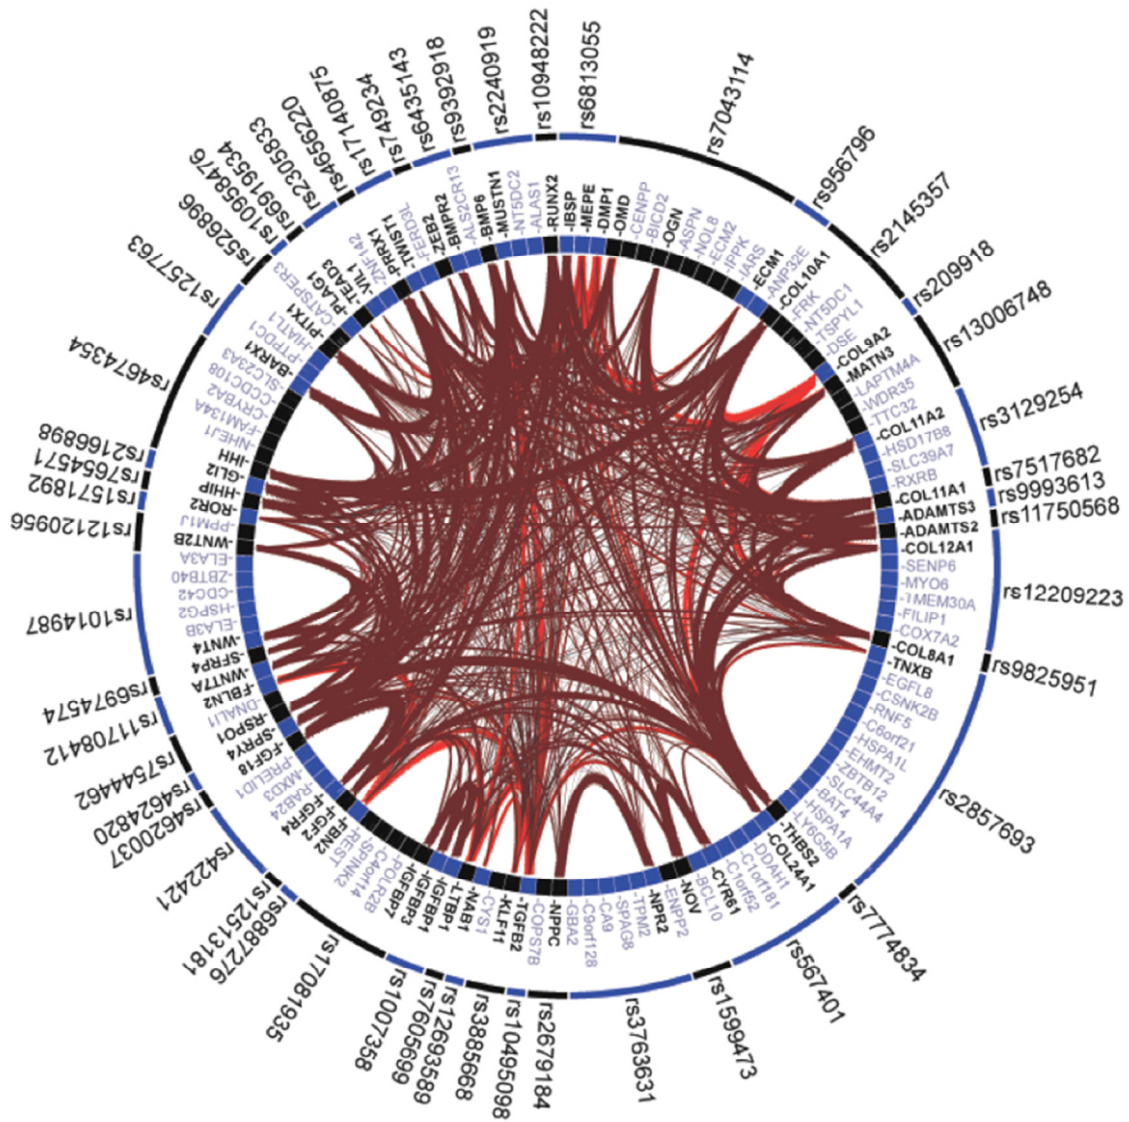

**Supplementary Figure 7**

**Results from GRAIL analysis.**

A subset of the 697 lead height SNPs are arranged along the outer circle alternating with colors. The inner circle represents the individual prioritized ( $P < 1 \times 10^{-6}$ ) genes. Gene names shown in black have literature connections, and the ones in gray do not. The redness and thickness of the lines connecting pairs of genes represent the strength of the connections. Top-ranking keywords prioritized by GRAIL were 'transcription', 'growth', 'nuclear', 'factor', 'binding', 'collagen', 'differentiation', 'promoter', 'development', 'ribosomal', 'bone', 'mice', 'expression' and 'cartilage'.

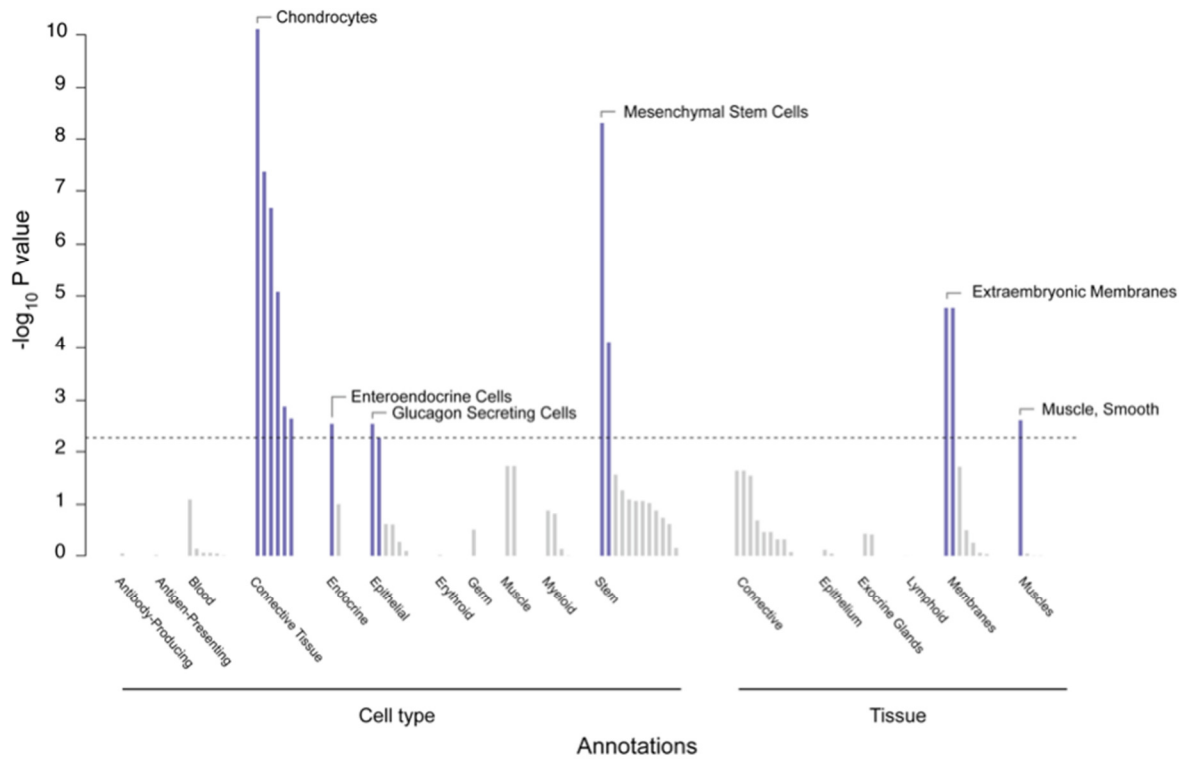

### Supplementary Figure 8

#### DEPICT cell type enrichment analysis.

Genes in associated height loci tended to be highly expressed in, among other cell types, chondrocytes and mesenchymal stem cells. The analysis was conducted based on the DEPICT method and 37,427 human microarray samples. Significantly enriched (FDR < 0.05) cell types are color coded in violet. The figure also includes tissue enrichment results, which were not shown in **Figure 3** of the main text.



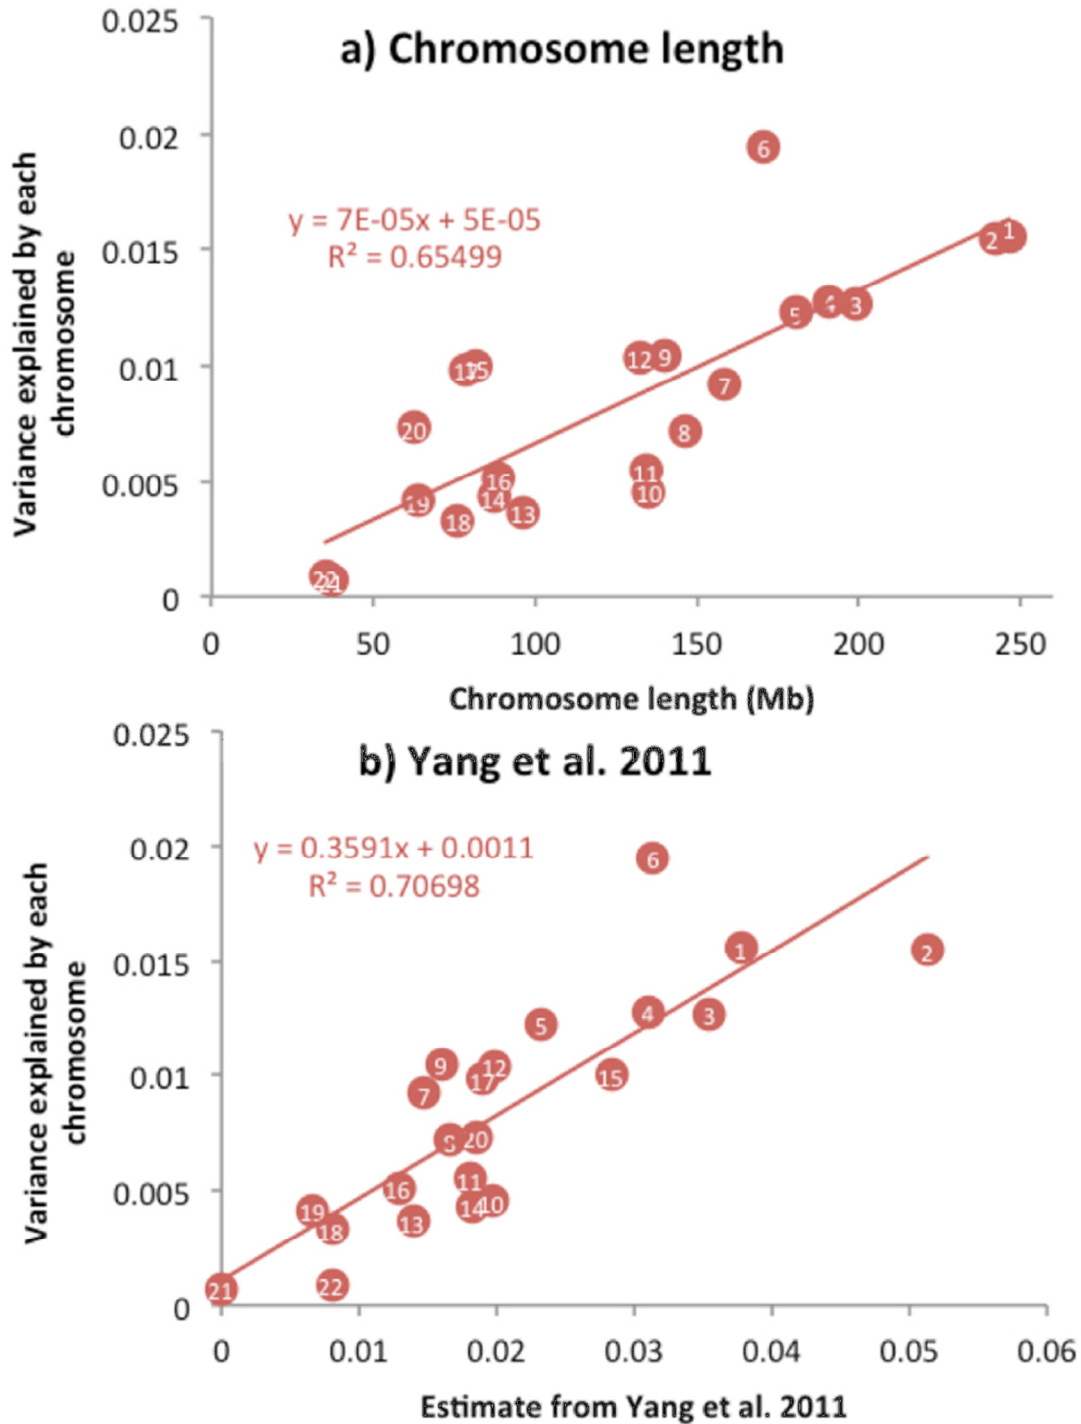

Supplementary Figure 9

**Partitioning the variance explained by chromosome length.**

- (a) The proportion of variance explained by the genome-wide significant SNPs on a chromosome plotted against chromosome length.  
 (b) The correlation of the variance explained by the top GWAS SNPs on each chromosome against the estimate from Yang *et al.* (2011) for that chromosome. Note: the numbers in red circles indicate chromosome number.

# Defining the role of common variation in the genomic and biological architecture of adult human height

Andrew R Wood, Tonu Esko, Jian Yang, Sailaja Vedantam, Tune H Pers, *et al.* \*

\*A full list of author names appears in the main paper.

---

## SUPPLEMENTARY INFORMATION

---

|                             |              |
|-----------------------------|--------------|
| <b>Supplementary Tables</b> | <b>p. 2</b>  |
| <b>Supplementary Note</b>   | <b>p. 45</b> |

## Supplementary Tables

|                                                                                                                                                                            |              |
|----------------------------------------------------------------------------------------------------------------------------------------------------------------------------|--------------|
| <b>Supplementary Table 1.</b> SNPs representing signals identified through meta-analysis and approximate conditional analysis.                                             | <b>.xls</b>  |
| <b>Supplementary Table 2.</b> Results from cluster analyses of multiple signals using different sized windows around index SNPs.                                           | <b>p. 3</b>  |
| <b>Supplementary Table 3.</b> Results from Metabochip replication analysis.                                                                                                | <b>.xls</b>  |
| <b>Supplementary Table 4.</b> Genomic inflation factors derived from performing linear mixed model association analyses.                                                   | <b>p. 4</b>  |
| <b>Supplementary Table 5.</b> Family based analysis and quantification of over-estimation (“Winner’s Curse”) effects in discovery GWAS.                                    | <b>p. 5</b>  |
| <b>Supplementary Table 6.</b> Within family association analysis of the variants identified in the discovery GWAS.                                                         | <b>p. 6</b>  |
| <b>Supplementary Table 7.</b> Non-synonymous variant enrichment analysis.                                                                                                  | <b>.xls</b>  |
| <b>Supplementary Table 8.</b> Cis-regulatory variant enrichment analysis.                                                                                                  | <b>.xls</b>  |
| <b>Supplementary Table 9.</b> Overlap with genes involved in abnormal skeletal growth syndromes.                                                                           | <b>p. 7</b>  |
| <b>Supplementary Table 10.</b> Overlapping associations with “unrelated” traits in NHGRI GWAS catalog.                                                                     | <b>p. 8</b>  |
| <b>Supplementary Table 11.</b> Enrichment of functional genomic elements catalogued by ENCODE and the Roadmap Epigenomics Projects.                                        | <b>p. 10</b> |
| <b>Supplementary Table 12.</b> Summary of results from gene-set enrichment analysis as implemented by MAGENTA for gene set enrichment analysis.                            | <b>p. 11</b> |
| <b>Supplementary Table 13.</b> Results from GRAIL text-mining analysis.                                                                                                    | <b>.xls</b>  |
| <b>Supplementary Table 14.</b> Pathways and protein complexes prioritized by DEPICT.                                                                                       | <b>.xls</b>  |
| <b>Supplementary Table 15.</b> DEPICT analysis of tissue enrichment.                                                                                                       | <b>p. 12</b> |
| <b>Supplementary Table 16.</b> Results from DEPICT gene prioritization analysis.                                                                                           | <b>.xls</b>  |
| <b>Supplementary Table 17.</b> Study design, number of individuals and sample quality control for genome-wide association study cohorts.                                   | <b>p.14</b>  |
| <b>Supplementary Table 18.</b> Information on genotyping methods, quality control of SNPs, imputation, and statistical analysis for genome-wide association study cohorts. | <b>p.19</b>  |
| <b>Supplementary Table 19.</b> Study-specific descriptive statistics for genome-wide association study cohorts.                                                            | <b>p. 21</b> |
| <b>Supplementary Table 20.</b> Study design, number of individuals and sample quality control for Metabochip study cohorts.                                                | <b>p. 27</b> |
| <b>Supplementary Table 21.</b> Information on genotyping methods, quality control of SNPs, imputation, and statistical analysis for Metabochip study cohorts.              | <b>p. 33</b> |
| <b>Supplementary Table 22.</b> Study-specific descriptive statistics for Metabochip study cohorts.                                                                         | <b>p. 36</b> |

**Supplementary Table 2. Results from cluster analyses of multiple signals using different sized windows around index SNPs.** These results are based on 10,000 SNP sets matched for allele frequency, locus gene density and distance to nearest gene but otherwise randomly selected from across the genome. The table provides a breakdown of the number of loci the 697 SNPs fit into based on different locus size definitions and the clustering of SNP pairs among the 697 within varying genomic distances.

| Locus definition      | # Loci 697 SNPs fit into    | Average # loci that random 697 SNPs fall into | 5% - 95% confidence intervals around average # loci for random SNPs | P-value           |
|-----------------------|-----------------------------|-----------------------------------------------|---------------------------------------------------------------------|-------------------|
| <b>+/- 1.25 Mb</b>    | <b>399</b>                  | <b>462</b>                                    | <b>445-480</b>                                                      | <b>&lt;0.0001</b> |
| <b>+/- 1 Mb</b>       | <b>423</b>                  | <b>496</b>                                    | <b>479-513</b>                                                      | <b>&lt;0.0001</b> |
| <b>+/- 500 kb</b>     | <b>502</b>                  | <b>574</b>                                    | <b>559-589</b>                                                      | <b>&lt;0.0001</b> |
| <b>+/- 250 kb</b>     | <b>563</b>                  | <b>624</b>                                    | <b>611-636</b>                                                      | <b>&lt;0.0001</b> |
| <b>+/- 100 kb</b>     | <b>623</b>                  | <b>660</b>                                    | <b>650-669</b>                                                      | <b>&lt;0.0001</b> |
| Distance range        | # SNP-pairs within distance | Average # random SNP pairs within distance    | Range of random SNP pairs within distance                           | P-value           |
| <b>50kb to 100kb</b>  | <b>55</b>                   | <b>37</b>                                     | <b>24-53</b>                                                        | <b>&lt;0.0001</b> |
| <b>100kb to 200kb</b> | <b>63</b>                   | <b>47</b>                                     | <b>31-69</b>                                                        | <b>0.0014</b>     |
| <b>200kb to 300kb</b> | <b>53</b>                   | <b>44</b>                                     | <b>29-64</b>                                                        | <b>0.032</b>      |
| 300kb to 400kb        | 49                          | 42                                            | 27-61                                                               | 0.081             |
| 400kb to 500kb        | 44                          | 41                                            | 27-58                                                               | 0.25              |
| 500kb to 600kb        | 39                          | 39                                            | 26-57                                                               | 0.61              |
| 600kb to 700kb        | 38                          | 38                                            | 26-56                                                               | 0.57              |
| 700kb to 800kb        | 39                          | 37                                            | 24-54                                                               | 0.38              |
| 800kb to 900kb        | 34                          | 36                                            | 24-56                                                               | 0.81              |
| 900kb to 1Mb          | 39                          | 36                                            | 23-51                                                               | 0.27              |
| <b>+/- 1Mb</b>        | <b>274</b>                  | <b>200</b>                                    | <b>162-243</b>                                                      | <b>&lt;0.0001</b> |
| <b>100kb to 1Mb</b>   | <b>222</b>                  | <b>186</b>                                    | <b>144-277</b>                                                      | <b>0.0002</b>     |
| 250kb to 1Mb          | 162                         | 150                                           | 114-182                                                             | 0.12              |
| <b>100kb to 500kb</b> | <b>143</b>                  | <b>108</b>                                    | <b>78-138</b>                                                       | <b>&lt;0.0001</b> |
| 250kb to 500kb        | 83                          | 72                                            | 48-96                                                               | 0.053             |
| 500kb to 1Mb          | 101                         | 101                                           | 74-135                                                              | 0.51              |

**Supplementary Table 4. Genomic inflation factors derived from performing linear mixed model association analyses.** Lambda inflation factors from subsets of data analysed using genomic relationship matrices and used to validate inflated statistics from the main meta-analysis. All studies performed leave one chromosome out (genomic relationship matrix GRM-LOO) analyses as well as using data from all chromosomes to calculate genomic relationship matrices (GRM-ALL) except WGHS, whose large size precluded the generation of 22 separate matrices, and who performed an odd-even analysis (GRM-O/E). Results are compared to those from standard single GC corrected GWAS (Std single GC GWAS). Meta-analysis lambdas in square brackets indicate the values from scaling the result in the 59,380 samples to a total of 250,000 individuals.

| Study                                             | N      | EMMAX-ALL  | EMMAX-LOO or O/E | Std Single GC GWAS | In Main GWAS Meta-analysis |
|---------------------------------------------------|--------|------------|------------------|--------------------|----------------------------|
| COLAUS                                            | 5,410  | 0.989      | 1.031            | 1.029              | Yes                        |
| DGI                                               | 2,407  | 1.002      | 1.035            | 1.037              | Yes                        |
| EGCUT (OMNI)                                      | 1,293  | 0.997      | 1.014            | 1.085              | Yes                        |
| EPIC                                              | 3,585  | 1.005      | 1.036            | 1.042              | Yes                        |
| FENLAND                                           | 1,402  | 0.996      | 1.023            | 1.056              | Yes                        |
| FUSION                                            | 2,249  | 0.994      | 1.034            | 1.184              | Yes                        |
| PIVUS                                             | 948    | 0.987      | 1.002            | 1.011              | No                         |
| InCHIANTI                                         | 1,138  | 0.99       | 1.004            | 1.051              | Yes                        |
| MIGEN                                             | 2,659  | 1.002      | 1.018            | 1.009              | Yes                        |
| QIMR                                              | 3,672  | 0.994      | 1.022            | 1.02               | Yes                        |
| RISC                                              | 1,106  | 1.001      | 1.008            | 1.014              | Yes                        |
| RSI                                               | 5,373  | 1.004      | 1.062            | 1.088              | Yes                        |
| TWINGENE                                          | 5,668  | 1.001      | 1.055            | 1.052              | Yes                        |
| ULSAM                                             | 1,116  | 0.995      | 1.01             | 1.031              | No                         |
| WGHS*                                             | 21,354 | 0.974      | 1.07             | 1.13               | No                         |
| <b>Meta-analysis of 14 Studies (without WGHS)</b> |        |            |                  |                    |                            |
| GC M/A                                            | 38,026 | 1.16       | 1.21             | 1.2                |                            |
| <b>Meta-analysis of 15 Studies (with WGHS)</b>    |        |            |                  |                    |                            |
| GC M/A                                            | 59,380 | 1.2 [1.83] | 1.29 [2.21]      | 1.23 [1.94]        |                            |

**Supplementary Table 5. Family based analysis and quantification of over-estimation (“Winner’s Curse”) effects in discovery GWAS.** The discovery meta-analysis as repeated, excluding either a set of family-based studies or, in turn, three random sets of non-family-based studies (with total sample sizes matched to the effective sample size of the combined family-based studies). The multiple loci in each meta-analysis were selected after clumping of SNPs based on  $r^2 < 0.01$  and 1 Mb distance windows, and effect sizes were estimated. The power to replicate in the excluded samples was calculated at different  $P$ -value thresholds using the effect size estimates and the effective sample size. The estimated deficit in replication due to the winner’s curse is the average deficit in observed, compared with expected replications for the three sets of random non-family-based studies, after adjustment to match the number of significant SNPs (416) seen in the meta-analysis that excluded the family-based samples. The upper limit of false positives due to stratification is calculated as the difference between the deficit observed in the non-family-based samples (attributable to winner's curse alone) and the deficit of replication seen in the family-based samples (attributable to winner’s curse plus stratification).

| Threshold             | Family Based<br>N=14,963,SNPs=416 |          | Random cohort Set1<br>N=14897,SNPs=416 |          | Random cohort Set2<br>N=15,648,SNPs=423 |          | Random cohort Set3<br>N=16,462,SNPs=435 |          | *Deficit in replication<br>from winner's curse | **Deficit in replication<br>from stratification | ***Upper limit of<br>completely false positives<br>from stratification |
|-----------------------|-----------------------------------|----------|----------------------------------------|----------|-----------------------------------------|----------|-----------------------------------------|----------|------------------------------------------------|-------------------------------------------------|------------------------------------------------------------------------|
|                       | Predicted                         | Observed | Predicted                              | Observed | Predicted                               | Observed | Predicted                               | Observed |                                                |                                                 |                                                                        |
| <b>Same Direction</b> | 399.98                            | 371      | 404.88                                 | 386      | 408.23                                  | 386      | 422.03                                  | 412      | 16.78                                          | 12.20                                           | 24.45                                                                  |
| <b>P &lt; 0.05</b>    | 209.63                            | 142      | 233.15                                 | 169      | 208.57                                  | 162      | 229.05                                  | 186      | 50.37                                          | 17.26                                           | 17.7                                                                   |
| <b>P &lt; 0.01</b>    | 127.99                            | 82       | 147.7                                  | 112      | 120.07                                  | 85       | 137.09                                  | 112      | 31.39                                          | 14.60                                           | 14.67                                                                  |

\* At each P value threshold, winner’s curse calculated as the average deficit of predicted vs. observed replicated signals in 3 random cohorts after adjusting to match the same number of 416 SNPs as that of family based studies (see Supplementary Methods 1.5.2).

\*\*Deficit due to stratification calculated as the difference in expected minus the observed replications in family based studies that cannot be explained by winner's curse.

\*\*\*Upper limit of completely false positives from stratification calculated as the number of false positive loci if the deficit in replication attributable to stratification is completely explained by a set of false positive loci, with no effect size inflation from stratification in the remaining loci (see Supplementary Methods).

**Supplementary Table 6. Within family association analysis of the variants identified in the discovery GWAS.** The directional concordance of the SNPs that could be analyzed within each study and after meta-analysis is shown below.

| <b>Study</b>         | <b>SNPs</b> | <b># Same Direction</b> | <b>% Concordant</b> | <b>Effective N</b> |
|----------------------|-------------|-------------------------|---------------------|--------------------|
| SardiNIA             | 238         | 160                     | 67                  | 3743               |
| QIMR                 | 416         | 319                     | 77                  | 3426               |
| TWINGENE             | 415         | 303                     | 73                  | 2766               |
| Amish                | 403         | 257                     | 64                  | 399                |
| Framingham           | 414         | 310                     | 75                  | 2920               |
| ERF                  | 385         | 227                     | 59                  | 634                |
| FamHS                | 416         | 301                     | 72                  | 1949               |
| <b>Meta Analysis</b> | <b>416</b>  | <b>371</b>              | <b>89</b>           | <b>14963</b>       |

**Supplementary Table 9. Overlap with genes involved in abnormal skeletal growth syndromes.** List of 266 abnormal skeletal/growth genes identified in the OMIM database (<http://www.ncbi.nlm.nih.gov/omim>) using the following keywords: short stature, overgrowth, skeletal dysplasia, brachydactyly. Of these, 39 were prioritised by DEPICT and are highlighted.

|                  |                 |               |                  |                 |
|------------------|-----------------|---------------|------------------|-----------------|
| <b>*ACAN</b>     | CTDP1           | GLI3          | NBN              | SHH             |
| ACP5             | CTSK            | <b>*GNAS</b>  | NEU1             | SHOX            |
| <b>*ADAMTS10</b> | CUL4B           | GNPAT         | NF1              | SHROOM4         |
| <b>*ADAMTS2</b>  | CUL7            | GNPTAB        | NFIX             | SIL1            |
| ADAMTSL2         | CYP11B1         | GPC3          | <b>*NIPBL</b>    | SLC26A2         |
| AGPS             | <b>*CYP19A1</b> | GPC6          | NKX3-2           | SLC29A3         |
| ALG12            | CYP21A2         | GUSB          | NOG              | SLC2A2          |
| ALMS1            | CYP27B1         | HCCS          | <b>*NPPC</b>     | SLC34A3         |
| ALPL             | DDR2            | HDAC4         | <b>*NPR2</b>     | SLC35C1         |
| ANKH             | DHCR7           | <b>*HES7</b>  | <b>*NSD1</b>     | <b>*SLC35D1</b> |
| ARL6             | <b>*DYM</b>     | HESX1         | OBSL1            | SLC37A4         |
| ARSB             | DYNC2H1         | <b>*HMGA2</b> | OCRL             | SLC39A13        |
| ARSE             | EBP             | HOXD13        | OFD1             | SLC4A4          |
| ATP6V0A2         | EFNB1           | HPRT1         | PAPSS2           | SLC6A8          |
| ATP7A            | <b>*EIF2AK3</b> | HRAS          | PAX3             | SMARCAL1        |
| ATP8B1           | ERCC2           | HSPG2         | PAX8             | SMC1A           |
| ATR              | ERCC3           | HYAL1         | PCNT             | SMC3            |
| ATRX             | ESCO2           | ICK           | PEX7             | SMPD1           |
| B3GALTL          | <b>*ESR1</b>    | IDUA          | PHEX             | SMS             |
| B4GALT7          | EVC             | IFT122        | PHF6             | SNAP47          |
| BBS1             | EVC2            | IFT80         | PITX2            | SOS1            |
| BBS10            | EXT1            | IGBP1         | POU1F1           | SOST            |
| BBS12            | EXT2            | IGF1          | PQBP1            | SOX3            |
| BBS2             | FAM123B         | <b>*IGF1R</b> | PROP1            | <b>*SOX9</b>    |
| BBS4             | FAM20C          | IGF2          | <b>*PTCH1</b>    | SPG20           |
| BBS5             | <b>*FANCA</b>   | IHH           | PTCH2            | SRY             |
| BBS7             | FANCB           | IKBKKG        | PTEN             | STAT5B          |
| BBS9             | FANCC           | JAG1          | PTH1R            | TAZ             |
| BMPR1B           | FANCD2          | KCNJ2         | <b>*PTHLH</b>    | TBCE            |
| BRAF             | FANCE           | KDM5C         | PTPN11           | TBX1            |
| BRCA2            | FANCF           | KIAA1279      | RAB23            | <b>*TBX15</b>   |
| BTK              | FANCG           | KRAS          | RAB3GAP1         | TCF4            |
| BUB1B            | <b>*FANCI</b>   | LBR           | RAB3GAP2         | TGFBR1          |
| C7orf11          | FANCL           | LEMD3         | <b>*RAF1</b>     | TGFBR2          |
| CA2              | FANCM           | LEPRE1        | RAI1             | THRB            |
| CCDC28B          | <b>*FBN1</b>    | LFNG          | RBM28            | TNFRSF11B       |
| CEP290           | <b>*FBN2</b>    | LHX4          | RECQL4           | TP63            |
| CHD7             | FGD1            | LIFR          | RMRP             | TRAPPC2         |
| CHRNA2           | FGF23           | LIG4          | RNF135           | TRIM32          |
| CHST3            | <b>*FGFR2</b>   | LMBR1         | ROR2             | TRIM37          |
| CLCN5            | FGFR3           | LMNA          | RPL11            | <b>*TRIP11</b>  |
| COL10A1          | FLNA            | LRP5          | RPL35A           | <b>*TRPS1</b>   |
| <b>*COL11A1</b>  | <b>*FLNB</b>    | MAP2K1        | RPL5             | TRPV4           |
| <b>*COL11A2</b>  | FOXC1           | MAP2K2        | RPS17            | TWIST1          |
| COL1A1           | FUCA1           | MATN3         | RPS19            | UBR1            |
| COL1A2           | G6PC            | <b>*MC4R</b>  | RPS24            | <b>*WDR35</b>   |
| COL2A1           | GALNS           | MECP2         | RPS6KA3          | <b>*WNT3</b>    |
| COL5A1           | <b>*GDF5</b>    | MGP           | RPS7             | WNT7A           |
| COL5A2           | GH1             | MKKS          | RUNX2            | WRN             |
| COL9A1           | <b>*GHR</b>     | MKS1          | SBDS             | ZBTB16          |
| <b>*COL9A2</b>   | GHRHR           | MMP13         | SDHA             |                 |
| COL9A3           | <b>*GHSR</b>    | MMP2          | SECISBP2         |                 |
| COMP             | GJA1            | MRPS16        | SEMA3E           |                 |
| CRTAP            | GLB1            | MYCN          | <b>*SERPINH1</b> |                 |



**Supplementary Table 10. Overlapping associations with “unrelated” traits in NHGRI GWAS catalog.** GIANT lead height variants or strong proxies ( $r^2>0.8$ ) associated with other traits and diseases reported in the NHGRI catalog of published GWAS at genome-wide level of significance ( $P<5\times 10^{-8}$ ).

| GIANT height SNP | Proxy SNP from NHGRI catalog | Chr      | Position (bp) | Height P-value for NHGRI SNP (SingleGC) | Disease/ Trait                 | NHGRI Catalog Trait P-value    | Distance (bp) between SNPs | LD (r2) | Height increasing allele | Effect relative to height-increasing allele | Reference (PubMed ID)   |          |
|------------------|------------------------------|----------|---------------|-----------------------------------------|--------------------------------|--------------------------------|----------------------------|---------|--------------------------|---------------------------------------------|-------------------------|----------|
| rs2284746        | rs2284746                    | 1        | 17306675      | 1.17E-40                                | Pulmonary function             | 8E-16                          | 0                          | 1       | G                        | reduced pulmonary function                  | 21946350                |          |
| rs926438         | rs3091242                    | 1        | 25674785      | 5.16E-07                                | Erythrocyte sedimentation rate | 2E-13                          | 78853                      | 0.934   | T                        | n/a                                         | 21700265                |          |
|                  | rs10903129                   | 1        | 25768937      | 2.70E-06                                | Total cholesterol              | 5E-10                          | 15299                      | 0.967   | G                        | higher total cholesterol                    | 19060911                |          |
|                  | rs12027135                   | 1        | 25775733      | 3.10E-06                                | Erythrocyte sedimentation rate | 5E-13                          |                            |         |                          | n/a                                         | 21700265                |          |
|                  |                              |          |               |                                         | Total cholesterol              | 4E-11                          | 22095                      | 0.967   | T                        | higher total cholesterol                    | 20686565                |          |
|                  |                              |          |               |                                         | LDL cholesterol                | 1E-10                          |                            |         |                          | higher LDL cholesterol                      | 20686565                |          |
| rs12120956       | rs17030613                   | 1        | 113190807     | 2.63E-12                                | Blood pressure                 | 1E-08                          | 11764                      | 1       | A                        | lowe blood pressure                         | 21572416                |          |
| rs780094         | rs1260326                    | 2        | 27730940      | 1.35E-11                                | C-reactive protein             | 5E-40                          |                            |         |                          | lower protein levels                        | 21300955                |          |
|                  |                              |          |               |                                         | Cardiovascular disease         | 2E-08                          |                            |         |                          | lower CAD risk                              | 21943158                |          |
|                  |                              |          |               |                                         | Total cholesterol              | 7E-27                          |                            |         |                          | lower total cholesterol                     | 20686565                |          |
|                  |                              |          |               |                                         | Chronic kidney disease         | 3E-14                          |                            |         |                          | lower CKD risk                              | 20383146                |          |
|                  |                              |          |               |                                         | Hypertriglyceridemia           | 7E-09                          |                            |         |                          | lower hypertriglyceridemia risk             | 20657596                |          |
|                  |                              |          |               |                                         | Liver enzyme levels (GGT)      | 4E-13                          |                            |         |                          | lower enzyme levels                         | 22001757                |          |
|                  |                              |          |               |                                         | Metabolic traits               | 4E-10                          |                            |         |                          | lower metabolite levels                     | 19060910                |          |
|                  |                              |          |               |                                         | Metabolite levels              | 1E-12                          | 10297                      | 0.932   | C                        | n/a                                         | 22916037                |          |
|                  |                              |          |               |                                         | Metabolite levels              | 3E-18                          |                            |         |                          | n/a                                         | 22286219                |          |
|                  |                              |          |               |                                         | Non-albumin protein levels     | 3E-09                          |                            |         |                          | lower protein levels                        | 22558069                |          |
|                  |                              |          |               |                                         | Platelet counts                | 9E-10                          |                            |         |                          | lower platelet count                        | 22139419                |          |
|                  |                              |          |               |                                         | Serum albumin level            | 2E-08                          |                            |         |                          | lower protein levels                        | 23022100                |          |
|                  |                              |          |               |                                         | Triglycerides                  | 2E-31                          |                            |         |                          | lower triglycerides                         | 19060906                |          |
|                  |                              |          |               |                                         | Triglycerides                  | 6E-133                         |                            |         |                          | lower triglycerides                         | 20686565                |          |
|                  |                              |          |               |                                         | Two-hour glucose challenge     | 3E-10                          |                            |         |                          | reduced effect                              | 20081857                |          |
|                  | rs780094                     | rs780094 | 2             | 27741237                                | 5.71E-12                       | C-reactive protein             | 7E-15                      |         |                          |                                             | lower protein levels    | 18439548 |
|                  |                              |          |               |                                         |                                | Fasting glucose-related traits | 4E-20                      |         |                          |                                             | n/a                     | 20081858 |
|                  |                              |          |               |                                         |                                | Fasting glucose-related traits | 4E-24                      |         |                          |                                             | n/a                     | 22581228 |
|                  |                              |          |               |                                         |                                | Metabolic syndrome             | 6E-20                      |         |                          |                                             | lower MS risk           | 22399527 |
|                  |                              |          |               |                                         |                                | Metabolic traits               | 6E-53                      | 0       | 1                        | C                                           | lower metabolite levels | 21886157 |
|                  |                              |          |               |                                         |                                | Phospholipid levels            | 9E-09                      |         |                          |                                             | lower particle levels   | 21829377 |
|                  |                              |          |               |                                         |                                | Triglycerides                  | 3E-14                      |         |                          |                                             | lower triglycerides     | 18193044 |
|                  |                              |          |               |                                         |                                | Triglycerides                  | 3E-20                      |         |                          |                                             | lower triglycerides     | 19060911 |
|                  |                              |          |               |                                         |                                | Triglycerides                  | 6E-32                      |         |                          |                                             | lower triglycerides     | 18193043 |
|                  |                              |          |               |                                         |                                | Uric acid levels               | 1E-09                      |         |                          |                                             | lower UA levels         | 19503597 |
| rs780093         | 2                            | 27742603 | 9.56E-12      | Crohn's disease                         | 5E-11                          |                                |                            |         |                          | lower CD risk                               | 21102463                |          |
|                  |                              |          |               | Sex hormone-binding globulin levels     | 9E-11                          | 1366                           | 1                          | C       | higher protein levels    | 22829776                                    |                         |          |
|                  |                              |          |               | Triglycerides                           | 3E-10                          |                                |                            |         | lower triglycerides      | 21386085                                    |                         |          |
|                  |                              |          |               | Urate levels                            | 4E-17                          |                                |                            |         | lower urate levels       | 20884846                                    |                         |          |
| rs11684404       | rs1260333                    | 2        | 27748624      | 2.17E-08                                | Triglycerides                  | 2E-19                          | 7387                       | 0.87    | G                        | lower triglycerides                         | 20864672                |          |
| rs11684404       | rs7571971                    | 2        | 88895351      | 5.07E-23                                | Progressive supranuclear palsy | 4E-13                          | 29271                      | 0.848   | T                        | n/a                                         | 21685912                |          |
| rs724016         | rs6763931                    | 3        | 141102833     | 5.26E-154                               | Cancer (Prostate)              | 2E-08                          | 2737                       | 1       | A                        | increased cancer risk                       | 21743467                |          |
| rs2300921        | rs2002675                    | 3        | 185629568     | 1.89E-08                                | Menarche (age at onset)        | 1E-09                          | 21433                      | 1       | G                        | later menarche                              | 21102462                |          |

|            |            |    |           |          |                                           |       |        |       |   |                              |          |
|------------|------------|----|-----------|----------|-------------------------------------------|-------|--------|-------|---|------------------------------|----------|
| rs9292468  | rs1173766  | 5  | 32804528  | 1.96E-19 | Blood pressure                            | 2E-08 | 14545  | 0.84  | T | lower blood pressure         | 21572416 |
|            | rs1173771  | 5  | 32815028  | 2.79E-31 | Blood pressure                            | 5E-09 | 4045   | 1     | A | lower blood pressure         | 21909110 |
| rs6894139  | rs1366594  | 5  | 88376061  | 2.87E-23 | Bone mineral density                      | 8E-10 | 48279  | 0.967 | A | lower BMD                    | 21533022 |
|            |            |    |           |          | Bone mineral density (hip)                | 1E-13 |        |       |   | higher BMD                   | 19801982 |
| rs12186664 | rs6235     | 5  | 95728898  | 5.35E-11 | Proinsulin levels                         | 1E-26 | 98673  | 0.92  | G | n/a                          | 21873549 |
| rs7701414  | rs3091338  | 5  | 131402738 | 7.18E-24 | Crohn's disease                           | 4E-08 | 183220 | 0.872 | T | increased CD risk            | 22412388 |
| rs4624820  | rs4624820  | 5  | 141681788 | 1.05E-09 | Cancer (Testicular)                       | 1E-14 | 0      | 1     | A | increased cancer risk        | 20543847 |
|            |            |    |           |          | Cancer (Testicular)                       | 3E-13 |        |       |   | increased cancer risk        | 19483681 |
| rs6457374  | rs2524054  | 6  | 31252396  | 3.04E-30 | CD4:CD8 lymphocyte ratio                  | 6E-21 | 19865  | 0.933 | A | reduced ratio                | 20045101 |
|            | rs2247056  | 6  | 31265490  | 6.90E-34 | Triglycerides                             | 2E-15 | 6771   | 1     | T | lower triglycerides          | 20686565 |
| rs314263   | rs7759938  | 6  | 105378954 | 2.59E-43 | Menarche (age at onset)                   | 7E-09 | 13791  | 0.965 | C | later menarche               | 19448620 |
|            |            |    |           |          | Menarche (age at onset)                   | 5E-60 |        |       |   | later menarche               | 21102462 |
|            | rs314276   | 6  | 105407999 | 6.78E-42 | Menarche (age at onset)                   | 4E-16 | 15254  | 1     | A | later menarche               | 19448623 |
| rs2145357  | rs1999930  | 6  | 116387134 | 6.99E-08 | Age-related macular degeneration          | 1E-08 | 64308  | 0.924 | T | n/a                          | 21665990 |
| rs1155939  | rs9388489  | 6  | 126698719 | 1.32E-38 | Type 1 diabetes                           | 4E-13 | 167414 | 0.842 | G | increased T1D risk           | 19430480 |
|            | rs1361108  | 6  | 126767600 | 1.34E-38 | Menarche (age at onset)                   | 2E-08 | 98533  | 0.839 | T | earlier menarche             | 21102462 |
| rs798497   | rs798502   | 7  | 2789880   | 1.80E-66 | Ulcerative colitis                        | 3E-15 | 6077   | 0.959 | A | increased UC risk            | 21297633 |
| rs11783655 | rs6995402  | 8  | 145005561 | 2.07E-09 | Platelet counts                           | 5E-10 | 32012  | 0.902 | T | lower platelet count         | 22139419 |
| rs10766065 | rs900145   | 11 | 13293905  | 1.07E-07 | Menarche (age at onset)                   | 2E-08 | 15944  | 0.832 | C | later menarche               | 21102462 |
| rs2306694  | rs2066808  | 12 | 56737973  | 1.97E-14 | Psoriasis                                 | 1E-09 | 57337  | 1     | G | n/a                          | 19169254 |
| rs8756     | rs10784502 | 12 | 66343810  | 1.12E-82 | Brain structure                           | 1E-12 | 15942  | 0.967 | C | increased brain volume       | 22504417 |
|            | rs1042725  | 12 | 66358347  | 6.47E-88 | Head circumference (infant)               | 3E-10 | 1405   | 0.875 | C | increased head circumference | 22504419 |
| rs7980687  | rs7980687  | 12 | 123822711 | 1.03E-26 | Head circumference (infant)               | 8E-09 | 0      | 1     | A | increased head circumference | 22504419 |
| rs11616380 | rs1359790  | 13 | 80717156  | 1.63E-07 | Type 2 diabetes                           | 6E-09 | 11841  | 1     | A | lower T2D risk               | 20862305 |
| rs2093210  | rs10483727 | 14 | 61072875  | 1.69E-34 | Glaucoma (primary open-angle)             | 4E-11 | 115596 | 0.802 | T | increased cancer risk        | 22570617 |
|            |            |    |           |          | Vertical cup-disc ratio                   | 1E-11 |        |       |   | increased ratio              | 20548946 |
| rs1036477  | rs1036476  | 15 | 48914775  | 7.71E-11 | Thoracic aortic aneurysms and dissections | 6E-13 | 151    | 0.892 | T | n/a                          | 21909107 |
| rs7162825  | rs2652822  | 15 | 63422772  | 1.03E-07 | Metabolic traits                          | 7E-27 | 16414  | 0.935 | C | lower metabolite levels      | 21886157 |
| rs5742915  | rs5742915  | 15 | 74336633  | 1.52E-29 | Paget's disease                           | 2E-14 | 0      | 1     | C | increased PD risk            | 21623375 |
| rs2238300  | rs2307449  | 15 | 89863928  | 1.01E-10 | Menopause (age at onset)                  | 4E-13 | 12348  | 0.866 | T | later menopause              | 22267201 |
| rs1659127  | rs1659127  | 16 | 14388305  | 2.85E-19 | Menarche (age at onset)                   | 4E-09 | 0      | 1     | A | later menarche               | 21102462 |
| rs217181   | rs217181   | 16 | 72114002  | 3.74E-10 | Metabolite levels                         | 1E-36 | 0      | 1     | T | n/a                          | 22916037 |
| rs1625895  | rs1625895  | 17 | 7578115   | 3.88E-10 | Sex hormone-binding globulin levels       | 2E-21 | 0      | 1     | C | lower protein levels         | 22829776 |
| rs199515   | rs199533   | 17 | 44828931  | 1.22E-05 | Parkinson's disease                       | 1E-14 | 27706  | 0.947 | G | n/a                          | 19915575 |
|            | rs199515   | 17 | 44856641  | 1.56E-05 | Parkinson's disease                       | 3E-17 | 0      | 1     | C | n/a                          | 22451204 |
| rs318095   | rs46522    | 17 | 46988597  | 1.03E-14 | Coronary heart disease                    | 2E-08 | 13863  | 1     | C | lower CAD risk               | 21378990 |
| rs11152213 | rs12967135 | 18 | 57849023  | 2.93E-12 | HDL cholesterol                           | 7E-09 | 3925   | 1     | A | lower HDL cholesterol        | 20686565 |
| rs11880992 | rs12982744 | 19 | 2177193   | 1.61E-27 | Osteoarthritis                            | 1E-11 | 790    | 1     | G | lower OA risk                | 22566624 |
| rs2057291  | rs6026584  | 20 | 57469073  | 4.57E-10 | Renal function                            | 9E-09 | 2970   | 1     | T | increased renal function     | 22797727 |

**Supplementary Table 11. Enrichment of functional genomic elements catalogued by ENCODE and the Roadmap Epigenomics Projects.** Annotation of the GIANT height SNPs with epigenomic features. For each “seed” height SNPs, we retrieved all markers in linkage disequilibrium (LD,  $r^2 \geq 0.8$ ) using the European panel from the 1000 Genomes Project (CEU). We then annotated each “seed” and LD proxy using epigenomic tracks and counted the number of loci where a SNP overlaps an ENCODE or Roadmap Epigenomics Projects peak (for a given track, a locus can count only once even if several SNPs within the locus overlap ENCODE peaks). We repeated the annotation and counting procedure on a 1,000 sets of matched SNPs. Here we report the number of loci that overlap peaks in each track for ENCODE cell lines. For all marks tested the empirical enrichment *P*-value is <0.001. NA: track not available when we accessed the data.

|                              | ENCODE  |        |       |       |      | Roadmap Epigenomics |             |
|------------------------------|---------|--------|-------|-------|------|---------------------|-------------|
|                              | GM12878 | H1hESC | HEPG2 | HUVEC | K562 | Chondrocytes        | Osteoblasts |
| <b>Open chromatin</b>        |         |        |       |       |      |                     |             |
| DNA polymerase II            | 150     | 170    | 218   | 198   | 197  | NA                  | NA          |
| DNAse I hypersensitive sites | 238     | 259    | 235   | 254   | 228  | NA                  | 247         |
| FAIRE                        | 139     | 87     | 137   | 231   | 197  | NA                  | NA          |
| <b>DNA methylation</b>       |         |        |       |       |      |                     |             |
| Illumina 450K array          | 156     | 156    | 155   | 156   | 155  | NA                  | NA          |
| <b>Histone modification</b>  |         |        |       |       |      |                     |             |
| Ctcf                         | 245     | 243    | 199   | 228   | 257  | NA                  | 98          |
| Ezh2                         | 436     | 345    | 393   | 371   | 426  | NA                  | NA          |
| H2az                         | 317     | 402    | 399   | 383   | 335  | NA                  | NA          |
| H3k27ac                      | 248     | 373    | 258   | 309   | 263  | NA                  | 371         |
| H3k4me1                      | 376     | 411    | 411   | 396   | 361  | 269                 | 435         |
| H3k4me2                      | 323     | 320    | 335   | 358   | 278  | NA                  | 378         |
| H3k4me3                      | 330     | 248    | 279   | 269   | 266  | 271                 | 344         |
| H3k79me2                     | 271     | 277    | 304   | 318   | 274  | NA                  | NA          |
| H3k9ac                       | 230     | 354    | 270   | 284   | 269  | 239                 | NA          |
| H4k20me1                     | 410     | 388    | 359   | 365   | 424  | NA                  | NA          |

**Supplementary Table 12. Summary of results from gene-set enrichment analysis as implemented by MAGENTA for gene set enrichment analysis.** Shown are gene sets that met significance after correcting for multiple hypotheses testing. Gene set shown in **bold** was significant enriched in the previous GIANT height GWAS study (Lango Allen *et al*; 2010).

| Database                 | Biological pathways or Gene sets                     | Original # genes in gene set | # genes in gene set analyzed by GSEA | Nominal GSEA P-value | False discovery rate (FDR) | Expected # genes above 95th percentile cut-off | Observed # genes above 95th percentile cut-off |
|--------------------------|------------------------------------------------------|------------------------------|--------------------------------------|----------------------|----------------------------|------------------------------------------------|------------------------------------------------|
| Gene Ontology            | nucleosome                                           | 64                           | 35                                   | 8.00E-06             | 0.022                      | 2                                              | 10                                             |
| Gene Ontology            | heart morphogenesis                                  | 29                           | 28                                   | 3.90E-05             | 0.026                      | 1                                              | 8                                              |
| Gene Ontology            | nucleosome assembly                                  | 80                           | 47                                   | 1.30E-05             | 0.036                      | 2                                              | 11                                             |
| Gene Ontology            | chromosome                                           | 147                          | 112                                  | 9.00E-06             | 0.037                      | 6                                              | 18                                             |
| KEGG                     | Hedgehog signaling pathway                           | 56                           | 53                                   | 2.00E-04             | 0.04                       | 3                                              | 10                                             |
| PANTHER                  | Hedgehog signaling pathway                           | 14                           | 14                                   | 6.00E-04             | 0.023                      | 1                                              | 5                                              |
| PANTHER (BioProc)        | Lactation mammary development                        | 13                           | 11                                   | 6.00E-06             | 2.00E-04                   | 1                                              | 6                                              |
| <b>PANTHER (BioProc)</b> | <b>Chromatin packaging and remodeling</b>            | <b>237</b>                   | <b>140</b>                           | <b>1.00E-06</b>      | <b>0.002</b>               | <b>7</b>                                       | <b>22</b>                                      |
| PANTHER (MolFunc)        | Histone                                              | 86                           | 31                                   | 9.90E-07             | <<1E-5                     | 2                                              | 11                                             |
| REACTOME                 | PACKAGING_OF_TELOMERE_ENDS                           | 49                           | 24                                   | 9.90E-07             | <<1E-5                     | 1                                              | 10                                             |
| REACTOME                 | RNA_POLYMERASE_I_PROMOTER_OPENING                    | 59                           | 23                                   | 9.90E-07             | <<1E-5                     | 1                                              | 10                                             |
| REACTOME                 | RNA_POLYMERASE_I_PROMOTER_CLEARANCE                  | 82                           | 43                                   | 5.00E-06             | 9.00E-04                   | 2                                              | 11                                             |
| REACTOME                 | TELOMERE_MAINTENANCE                                 | 77                           | 50                                   | 1.00E-04             | 0.005                      | 3                                              | 11                                             |
| REACTOME                 | APOPTOSIS_INDUCED_DNA_FRAGMENTATION                  | 11                           | 11                                   | 9.00E-04             | 0.019                      | 1                                              | 4                                              |
| REACTOME                 | RNA_POLYMERASE_I_III_AND_MITOCHONDRIAL_TRANSCRIPTION | 120                          | 81                                   | 4.00E-04             | 0.028                      | 4                                              | 13                                             |
| REACTOME                 | TRANSCRIPTION                                        | 197                          | 154                                  | 3.00E-04             | 0.044                      | 8                                              | 19                                             |

**Supplementary Table 15. DEPICT analysis of tissue enrichment.** The Data-driven Enrichment-Prioritized Integration for Complex Traits (DEPICT) method uses expression data from 37,427 human microarray samples to identify cell-types and tissues (defined by MeSH [*Medical Subject Headings*] terms) in which genes from associated loci are highly expressed. Locus gene sets were constructed by mapping genes to a given locus if they were within, or overlapped with, regions defined by linkage disequilibrium  $r^2 > 0.5$  around the lead height SNP of that locus.

| MeSH ID                                   | Name                     | MeSH first level term    | MeSH second level term  | P-value  | False-discovery rate |
|-------------------------------------------|--------------------------|--------------------------|-------------------------|----------|----------------------|
| <b>Lango-Allen et al. 199 Height SNPs</b> |                          |                          |                         |          |                      |
| A02.165                                   | Cartilage                | Musculoskeletal System   | Cartilage               | 0.0001   | 0.0400               |
| A11.329.171                               | Chondrocytes             | Cells                    | Connective Tissue Cells | 0.0011   | 0.0700               |
| A10.615.284                               | Extraembryonic Membranes | Tissues                  | Membranes               | 0.0012   | 0.0467               |
| A10.615.284.473                           | Chorion                  | Tissues                  | Membranes               | 0.0012   | 0.0350               |
| A11.872.580                               | Mesenchymal Stem Cells   | Cells                    | Stem Cells              | 0.0017   | 0.0440               |
| <b>697 Height SNPs</b>                    |                          |                          |                         |          |                      |
| A02.165                                   | Cartilage                | Musculoskeletal System   | Cartilage               | 1.55E-12 | < 0.0011             |
| A11.329.171                               | Chondrocytes             | Cells                    | Connective Tissue Cells | 7.84E-11 | < 0.0011             |
| A11.872.580                               | Mesenchymal Stem Cells   | Cells                    | Stem Cells              | 4.97E-09 | < 0.0011             |
| A02.835.583.443.800                       | Synovial Membrane        | Musculoskeletal System   | Skeleton                | 5.49E-09 | < 0.0011             |
| A02.835.583                               | Joints                   | Musculoskeletal System   | Skeleton                | 5.49E-09 | < 0.0011             |
| A02.835.583.443                           | Joint Capsule            | Musculoskeletal System   | Skeleton                | 5.49E-09 | < 0.0011             |
| A11.329.830                               | Stromal Cells            | Cells                    | Connective Tissue Cells | 4.12E-08 | < 0.0011             |
| A11.329.228                               | Fibroblasts              | Cells                    | Connective Tissue Cells | 2.09E-07 | < 0.0011             |
| A11.329.629                               | Osteoblasts              | Cells                    | Connective Tissue Cells | 8.34E-06 | < 0.0011             |
| A10.615.284                               | Extraembryonic Membranes | Tissues                  | Membranes               | 1.68E-05 | < 0.0011             |
| A10.615.284.473                           | Chorion                  | Tissues                  | Membranes               | 1.68E-05 | < 0.0011             |
| A02.835.232.834.151                       | Cervical Vertebrae       | Musculoskeletal System   | Skeleton                | 2.64E-05 | < 0.0011             |
| A02.835.232.834                           | Spine                    | Musculoskeletal System   | Skeleton                | 2.87E-05 | < 0.0011             |
| A11.872                                   | Stem Cells               | Cells                    | Stem Cells              | 7.59E-05 | < 0.0011             |
| A03.734.414                               | Islets of Langerhans     | Digestive System         | Pancreas                | 8.19E-05 | < 0.0011             |
| A04.411                                   | Lung                     | Respiratory System       | Lung                    | 8.59E-05 | < 0.0011             |
| A07.231.114                               | Arteries                 | Cardiovascular System    | Blood Vessels           | 0.0002   | 0.0012               |
| A05.360.319.114.373                       | Fallopian Tubes          | Urogenital System        | Genitalia               | 0.0003   | 0.0011               |
| A15.145.846                               | Serum                    | Hemic and Immune Systems | Blood                   | 0.0005   | 0.0032               |
| A05.360.319                               | Genitalia Female         | Urogenital System        | Genitalia               | 0.0005   | 0.0030               |
| A05.360.319.679.690                       | Myometrium               | Urogenital System        | Genitalia               | 0.0005   | 0.0038               |
| A05.360.319.679                           | Uterus                   | Urogenital System        | Genitalia               | 0.0008   | 0.0064               |
| A05.360.319.679.490                       | Endometrium              | Urogenital System        | Genitalia               | 0.0011   | 0.0078               |
| A11.329                                   | Connective Tissue Cells  | Cells                    | Connective Tissue Cells | 0.0013   | 0.0100               |
| A07.541.510                               | Heart Valves             | Cardiovascular System    | Heart                   | 0.0014   | 0.0104               |
| A07.541.510.110                           | Aortic Valve             | Cardiovascular System    | Heart                   | 0.0014   | 0.0100               |
| A07.231                                   | Blood Vessels            | Cardiovascular System    | Blood Vessels           | 0.0017   | 0.0111               |
| A05.360.319.114.630                       | Ovary                    | Urogenital System        | Genitalia               | 0.0019   | 0.0107               |
| A05.360.319.114                           | Adnexa Uteri             | Urogenital System        | Genitalia               | 0.0019   | 0.0110               |
| A11.329.114                               | Adipocytes               | Cells                    | Connective Tissue Cells | 0.0022   | 0.0107               |
| A10.690.467                               | Muscle Smooth            | Tissues                  | Muscles                 | 0.0024   | 0.0116               |
| A11.382.625                               | Enteroendocrine Cells    | Cells                    | Endocrine Cells         | 0.0028   | 0.0169               |
| A11.436.294.064                           | Glucagon Secreting Cells | Cells                    | Epithelial Cells        | 0.0028   | 0.0164               |
| A03.556.875.875                           | Stomach                  | Digestive System         | Gastrointestinal Tract  | 0.0037   | 0.0224               |
| A06.407                                   | Endocrine Glands         | Endocrine System         | Endocrine Glands        | 0.0039   | 0.0217               |
| A06.407.312                               | Gonads                   | Endocrine System         | Endocrine Glands        | 0.0041   | 0.0239               |

|                     |                              |                       |                        |        |        |
|---------------------|------------------------------|-----------------------|------------------------|--------|--------|
| A11.436.275         | Endothelial Cells            | Cells                 | Epithelial Cells       | 0.0055 | 0.0314 |
| A05.360             | Genitalia                    | Urogenital System     | Genitalia              | 0.0055 | 0.0311 |
| A03.734             | Pancreas                     | Digestive System      | Pancreas               | 0.0064 | 0.0349 |
| A03.556.875         | Upper Gastrointestinal Tract | Digestive System      | Gastrointestinal Tract | 0.0086 | 0.0480 |
| A07.231.908.670.874 | Umbilical Veins              | Cardiovascular System | Blood Vessels          | 0.0089 | 0.0473 |
| A07.231.908.670     | Portal System                | Cardiovascular System | Blood Vessels          | 0.0089 | 0.0462 |
| A07.231.908         | Veins                        | Cardiovascular System | Blood Vessels          | 0.0099 | 0.0474 |

**Supplementary Table 17.** Study design, number of individuals and sample quality control for genome-wide association study cohorts

| Study          |                                                                       | Study design                      | Total sample size (N) | Sample QC  |                                                                                                                                                                                                                                                            | Samples in analyses(N) | Anthropometric assessment method | References                                                                                                                                                                                                                                                                                                                                                                                                                                              |
|----------------|-----------------------------------------------------------------------|-----------------------------------|-----------------------|------------|------------------------------------------------------------------------------------------------------------------------------------------------------------------------------------------------------------------------------------------------------------|------------------------|----------------------------------|---------------------------------------------------------------------------------------------------------------------------------------------------------------------------------------------------------------------------------------------------------------------------------------------------------------------------------------------------------------------------------------------------------------------------------------------------------|
| Short name     | Full name                                                             |                                   |                       | Call rate* | other exclusions                                                                                                                                                                                                                                           |                        |                                  |                                                                                                                                                                                                                                                                                                                                                                                                                                                         |
| <b>ACTG</b>    | The AIDS Clinical Trials Group                                        | Population-based                  | 2648                  | >95%       | 1) Non-Europeans (based on PCA);<br>2) High individual missingness (>5%);<br>3) High heterozygosity (Inbreeding coefficient > 0.1 or < -0.1);<br>4) Related individuals<br>5) duplicates                                                                   | 1055                   | measured                         | International, H.I.V.C.S. et al. The major genetic determinants of HIV-1 control affect HLA class I peptide presentation. <i>Science</i> 330, 1551-7 (2010).                                                                                                                                                                                                                                                                                            |
| <b>AE</b>      | Athero-Express Biobank Study                                          | patient-cohort                    | 2512                  | ≥ 97%      | 1) Heterozygosity ( $\hat{H}$ ) ± 3 standard deviations of the mean;<br>2) Ethnic outliers through Principal Component Analysis compared to HapMap 2 (r22);<br>3) Related individuals and duplicates, $\pi > 0.20$ ;<br>4) Missing body weight and height. | 686                    | measured                         | 1) Verhoeven, B.A. et al. Athero-express: differential atherosclerotic plaque expression of mRNA and protein in relation to cardiovascular events and patient characteristics. <i>Rationale and design. Eur J Epidemiol</i> 19, 1127-33 (2004).<br>2) Hurks, R. et al. Aneurysm-express: human abdominal aortic aneurysm wall expression in relation to heterogeneity and vascular events - rationale and design. <i>Eur Surg Res</i> 45, 34-40 (2010). |
| <b>ASCOT</b>   | Anglo-Scandinavian Cardiac Outcome Trial                              | Randomised control clinical trial | 3868                  | ≥ 95%      | 1) Sample cryptic duplicates<br>2) Sample outliers in ancestry principle components analysis<br>3) First and second degree relatives;<br>4) Missing body weight and height.                                                                                | 3802                   | measured                         | 1) Sever, P.S. et al. Anglo-Scandinavian Cardiac Outcomes Trial: a brief history, rationale and outline protocol. <i>J Hum Hypertens</i> 15 Suppl 1, S11-2 (2001).<br>2) Sever, P.S. et al. Rationale, design, methods and baseline demography of participants of the Anglo-Scandinavian Cardiac Outcomes Trial. <i>ASCOT investigators. J Hypertens</i> 19, 1139-47 (2001).                                                                            |
| <b>BLSA</b>    | Baltimore Longitudinal Study on Aging                                 | Population-based                  | 848                   | ≥ 98.5%    | 1) sex mismatch<br>2) ethnic outliers                                                                                                                                                                                                                      | 844                    | measured                         | Shock, N.W., et al., Normal Human Aging: The Baltimore Study of Aging: NIH Publication No. 84-2450 (1984).                                                                                                                                                                                                                                                                                                                                              |
| <b>B-PROOF</b> | B-vitamins for the Prevention of Osteoporotic Fractures               | RCT                               | 2919                  | ≥ 95%      | 1) gender mismatches<br>2) related individuals                                                                                                                                                                                                             | 2669                   | measured                         | van Wijngaarden, J.P. et al. Rationale and design of the B-PROOF study, a randomized controlled trial on the effect of supplemental intake of vitamin B12 and folic acid on fracture incidence. <i>BMC Geriatr</i> 11, 80 (2011).                                                                                                                                                                                                                       |
| <b>DESIR</b>   | Data from an Epidemiological Study on the Insulin Resistance syndrome | Population-based                  | 731                   | ≥ 90%      | 1) Missing data;<br>2) ethnicity outliers (N=15)                                                                                                                                                                                                           | 716                    | measured                         | Balkau, B. [An epidemiologic survey from a network of French Health Examination Centres, (D.E.S.I.R.): epidemiologic data on the insulin resistance syndrome]. <i>Rev Epidemiol Sante Publique</i> 44, 373-5 (1996).                                                                                                                                                                                                                                    |
| <b>DNBC</b>    | Danish National Birth Cohort - Preterm Delivery Study                 | Case-control                      | 1937                  | ≥ 95%      | 1) persons born outside of Scandinavia or with parents born outside of Scandinavia;<br>2) Missing body weight and height.                                                                                                                                  | 1802                   | self-reported                    | 1) Olsen, J. et al. The Danish National Birth Cohort--its background, structure and aim. <i>Scand J Public Health</i> 29, 300-7 (2001).<br>2) Ryckman, K.K. et al. Replication of a genome-wide association study of birth weight in preterm neonates. <i>J Pediatr</i> 160, 19-24 e4 (2012).                                                                                                                                                           |

|                              |                                                                     |                                                                    |      |       |                                                                                                                               |      |          |                                                                                                                                                                                                                                                                                                                                                                               |
|------------------------------|---------------------------------------------------------------------|--------------------------------------------------------------------|------|-------|-------------------------------------------------------------------------------------------------------------------------------|------|----------|-------------------------------------------------------------------------------------------------------------------------------------------------------------------------------------------------------------------------------------------------------------------------------------------------------------------------------------------------------------------------------|
| <b>EGCUT-370</b>             | Estonian Genome Center, University of Tartu                         | Population-based                                                   | 866  | ≥ 97% | 1) ethnic outliers;<br>2) related individuals and duplicates;<br>3) Missing body weight and height.                           | 866  | measured | 1) Nelis, M. et al. Genetic structure of Europeans: a view from the North-East. PLoS One 4, e5472 (2009).<br>2) Metspalu, A. The Estonian Genome Project. Drug Development Research 62, 97-101 (2004).                                                                                                                                                                        |
| <b>EGCUT-OMNI</b>            | Estonian Genome Center, University of Tartu                         | Population-based                                                   | 1356 | ≥ 97% | 1) ethnic outliers;<br>2) related individuals and duplicates;<br>3) Missing body weight and height.                           | 1356 | measured | 1) Nelis, M. et al. Genetic structure of Europeans: a view from the North-East. PLoS One 4, e5472 (2009).<br>2) Metspalu, A. The Estonian Genome Project. Drug Development Research 62, 97-101 (2004).                                                                                                                                                                        |
| <b>ERF</b>                   | Erasmus Rucphen Family Study                                        | Family-based                                                       | 2726 | ≥98%  | Mendelian inconsistencies                                                                                                     | 2726 | measured | Aulchenko, Y.S. et al. Linkage disequilibrium in young genetically isolated Dutch population. Eur J Hum Genet 12, 527-34 (2004).                                                                                                                                                                                                                                              |
| <b>FamHS</b>                 | Family Heart Study                                                  | Population-based                                                   | 1486 | ≥ 98% | 1) ethnic outliers;<br>2) related individuals and duplicates;<br>3) Missing body weight and height.<br>4)sex inconsistencies. | 1463 | measured | 1) Higgins, M. et al. NHLBI Family Heart Study: objectives and design. Am J Epidemiol 143, 1219-28 (1996).<br>2) O'Donnell, C.J. et al. Genome-wide association study for coronary artery calcification with follow-up in myocardial infarction. Circulation 124, 2855-64 (2011).                                                                                             |
| <b>Health ABC</b>            | Health, Aging, and Body Composition Study                           | longitudinal cohort study                                          | 1655 | ≥ 97% | 1) related individuals and duplicates;<br>2) Missing body weight and height.                                                  | 1655 | measured | Harris, T.B. et al. Waist circumference and sagittal diameter reflect total body fat better than visceral fat in older men and women. The Health, Aging and Body Composition Study. Ann N Y Acad Sci 904, 462-73 (2000).                                                                                                                                                      |
| <b>HERITAGE Family Study</b> | Health, Risk Factors, Training and Genetics (HERITAGE) Family Study | Family Study, baseline data from an exercise training intervention | 500  | >99%  | NA                                                                                                                            | 500  | measured | 1) Bouchard, C. et al. The HERITAGE family study. Aims, design, and measurement protocol. Med Sci Sports Exerc 27, 721-9 (1995).<br>2) Bouchard C, Sarzynski MA, Rice T, Kraus W, Church T, Sung YJ, Rao DC, Rankinen T. Genomic predictors of maximal oxygen uptake response to standardized exercise training programs. Journal of Applied Physiology 110:1160-1170 (2011). |
| <b>HYPERGENES Controls</b>   | HYPERGENES                                                          | Case-control                                                       | 1934 | >90%  | 1) ethnic outliers<br>2) Missing body weight and height.                                                                      | 1900 | measured | Salvi, E. et al. Genomewide association study using a high-density single nucleotide polymorphism array and case-control design identifies a novel essential hypertension susceptibility locus in the promoter region of endothelial NO synthase. Hypertension 59, 248-55 (2012).                                                                                             |
| <b>HYPERGENES Cases</b>      | HYPERGENES                                                          | Case-control                                                       | 2124 | >90%  | 1) ethnic outliers<br>2) Missing body weight and height.                                                                      | 1841 | measured | Salvi, E. et al. Genomewide association study using a high-density single nucleotide polymorphism array and case-control design identifies a novel essential hypertension susceptibility locus in the promoter region of endothelial NO synthase. Hypertension 59, 248-55 (2012).                                                                                             |
| <b>InCHIANTI</b>             | Invecchiare in Chianti                                              | Population-based                                                   | 1210 | ≥ 98% | 1) Sex mismatch<br>2) heterozygosity <30%;<br>3) Missing body weight or height.                                               | 1138 | measured | Ferrucci, L. et al. Subsystems contributing to the decline in ability to walk: bridging the gap between epidemiology and geriatric practice in the InCHIANTI study. J Am Geriatr Soc 48, 1618-25 (2000).                                                                                                                                                                      |



|                              |                                                                                |                                       |      |       |                                                                                                                                                                                                                    |      |               |                                                                                                                                                                                                                                                                                                                                                                                                                                                                                  |
|------------------------------|--------------------------------------------------------------------------------|---------------------------------------|------|-------|--------------------------------------------------------------------------------------------------------------------------------------------------------------------------------------------------------------------|------|---------------|----------------------------------------------------------------------------------------------------------------------------------------------------------------------------------------------------------------------------------------------------------------------------------------------------------------------------------------------------------------------------------------------------------------------------------------------------------------------------------|
| <b>IPM Mount Sinai BioMe</b> | The Charles Bronfman Institute for Personalized Medicine BioMe Biobank Program | Hospital-based                        | 3069 | ≥ 95% | 1) heterozygosity (Z-value >  6 )<br>2) Gender mismatch errors<br>3) ethnic outliers;<br>4) First degree relatives and duplicates;<br>5) Missing body weight, height, or BMI (then excluded only from that group). | 2867 | measured      | Tayo, B.O. et al. Genetic background of patients from a university medical center in Manhattan: implications for personalized medicine. PLoS One 6, e19166 (2011).                                                                                                                                                                                                                                                                                                               |
| <b>LifeLines</b>             | LifeLines Cohort study                                                         | Population-based                      | 9480 | ≥ 95% | 1) heterozygosity >4SD from mean;<br>2) ethnic outliers;<br>3) related individuals and duplicates;<br>4) sex mismatch with database;<br>5) Missing age, sex, height                                                | 8118 | measured      | Stolk, R.P. et al. Universal risk factors for multifactorial diseases: LifeLines: a three-generation population-based study. Eur J Epidemiol 23, 67-74 (2008).                                                                                                                                                                                                                                                                                                                   |
| <b>LLS</b>                   | Leiden Longevity Study                                                         | Family based                          | 2415 | ≥ 95% | 1) ethnic outliers<br>2) Missing body weight and height.                                                                                                                                                           | 1903 | self-reported | 1) Schoenmaker, M. et al. Evidence of genetic enrichment for exceptional survival using a family approach: the Leiden Longevity Study. Eur J Hum Genet 14, 79-84 (2006).<br>2) Westendorp, R.G. et al. Nonagenarian siblings and their offspring display lower risk of mortality and morbidity than sporadic nonagenarians: The Leiden Longevity Study. J Am Geriatr Soc 57, 1634-7 (2009).                                                                                      |
| <b>LOLIPOP_EW610</b>         | London Life Sciences Prospective Population Study                              | Population-based                      | 945  | ≥ 95% | 1) Duplicates<br>2) gender discrepancy<br>3) contaminated samples<br>4) relatedness                                                                                                                                | 927  | measured      | 1) Wain, L.V. et al. Genome-wide association study identifies six new loci influencing pulse pressure and mean arterial pressure. Nat Genet 43, 1005-11 (2011).<br>2) International Consortium for Blood Pressure Genome-Wide Association, S. et al. Genetic variants in novel pathways influence blood pressure and cardiovascular disease risk. Nature 478, 103-9 (2011).                                                                                                      |
| <b>LOLIPOP_EWA</b>           | London Life Sciences Prospective Population Study                              | Population-based with some enrichment | 878  | ≥ 95% | 1) Duplicates<br>2) contaminated samples<br>3) relatedness<br>4) samples already in EW610                                                                                                                          | 513  | measured      | Yuan, X. et al. Population-based genome-wide association studies reveal six loci influencing plasma levels of liver enzymes. Am J Hum Genet 83, 520-8 (2008).                                                                                                                                                                                                                                                                                                                    |
| <b>LOLIPOP_EWP</b>           | London Life Sciences Prospective Population Study                              | Population-based with some enrichment | 1006 | ≥ 95% | 1) Duplicates<br>2) contaminated samples<br>3) samples already in EW610                                                                                                                                            | 651  | measured      | Kooner, J.S. et al. Genome-wide scan identifies variation in MLXIPL associated with plasma triglycerides. Nat Genet 40, 149-51 (2008).                                                                                                                                                                                                                                                                                                                                           |
| <b>NELSON</b>                | Dutch and Belgian Lung Cancer Screening Trial                                  | Current and former heavy smokers      | 3082 | ≥ 98% | 1) heterozygosity > 2d from mean;<br>2) ethnic outliers;<br>4) related individuals (r2>0.2) and duplicates;<br>5) Missing height.                                                                                  | 2668 | measured      | 1) van Iersel, C.A. et al. Risk-based selection from the general population in a screening trial: selection criteria, recruitment and power for the Dutch-Belgian randomised lung cancer multi-slice CT screening trial (NELSON). Int J Cancer 120, 868-74 (2007).<br>2) van Setten, J. et al. Genome-wide association study of coronary and aortic calcification implicates risk loci for coronary artery disease and myocardial infarction. Atherosclerosis 228, 400-5 (2013). |

|                           |                                                                                  |                               |       |         |                                                                                                                                                             |       |                          |                                                                                                                                                                                                                                                                                                                                                                                                                                                                                                                                                                       |
|---------------------------|----------------------------------------------------------------------------------|-------------------------------|-------|---------|-------------------------------------------------------------------------------------------------------------------------------------------------------------|-------|--------------------------|-----------------------------------------------------------------------------------------------------------------------------------------------------------------------------------------------------------------------------------------------------------------------------------------------------------------------------------------------------------------------------------------------------------------------------------------------------------------------------------------------------------------------------------------------------------------------|
| <b>PLCO2 controls</b>     | Prostate, Lung, Colorectal, and Ovarian Cancer Screening Trial                   | Population-based case-control | 1216  | >98%    | 1) sex discordance with genetic data;<br>2) heterozygosity;<br>3) ancestry outliers;<br>4) related individuals and duplicates;<br>5) missing phenotype data | 1193  | self-report              | Cornelis, M.C. et al. Genome-wide meta-analysis identifies regions on 7p21 (AHR) and 15q24 (CYP1A2) as determinants of habitual caffeine consumption. <i>PLoS Genet</i> 7, e1002033 (2011).                                                                                                                                                                                                                                                                                                                                                                           |
| <b>PLCO2 cases</b>        | Prostate, Lung, Colorectal, and Ovarian Cancer Screening Trial                   | Population-based case-control | 3003  | >98%    | 1) sex discordance with genetic data;<br>2) heterozygosity;<br>3) ancestry outliers;<br>4) related individuals and duplicates;<br>5) missing phenotype data | 2976  | self-report              | Cornelis, M.C. et al. Genome-wide meta-analysis identifies regions on 7p21 (AHR) and 15q24 (CYP1A2) as determinants of habitual caffeine consumption. <i>PLoS Genet</i> 7, e1002033 (2011).                                                                                                                                                                                                                                                                                                                                                                           |
| <b>PREVEND</b>            | Prevention of REnal and Vascular ENdstage Disease (PREVEND) Study                | Population-based              | 3920  | ≥ 95%   | 1) Ethnic outliers<br>2) related individuals and duplicates<br>3) missing phenotype                                                                         | 3624  | measured                 | Hillege, H.L. et al. Urinary albumin excretion predicts cardiovascular and noncardiovascular mortality in general population. <i>Circulation</i> 106, 1777-82 (2002).                                                                                                                                                                                                                                                                                                                                                                                                 |
| <b>PROCARDIS</b>          | Precocious Coronary Artery Disease                                               | Population-based              | 13000 | ≥ 95%   | 1) ethnic outliers;<br>2) Missing body weight and height.                                                                                                   | ~7000 | measured                 | 1) Coronary Artery Disease Genetics, C. A genome-wide association study in Europeans and South Asians identifies five new loci for coronary artery disease. <i>Nat Genet</i> 43, 339-44 (2011).<br>2) Broadbent, H.M. et al. Susceptibility to coronary artery disease and diabetes is encoded by distinct, tightly linked SNPs in the ANRIL locus on chromosome 9p. <i>Hum Mol Genet</i> 17, 806-14 (2008).                                                                                                                                                          |
| <b>PROSPER/<br/>PHASE</b> | The PROspective study of Pravastatin in the Elderly at Risk for vascular disease | Randomized controlled trial   | 5.784 | ≥ 97.5% | 1) heterozygosity ;<br>2) ethnic outliers;<br>3) related individuals and duplicates;                                                                        | 5244  | measured                 | 1) Shepherd, J. et al. The design of a prospective study of Pravastatin in the Elderly at Risk (PROSPER). PROSPER Study Group. PROspective Study of Pravastatin in the Elderly at Risk. <i>Am J Cardiol</i> 84, 1192-7 (1999).<br>2) Shepherd, J. et al. Pravastatin in elderly individuals at risk of vascular disease (PROSPER): a randomised controlled trial. <i>Lancet</i> 360, 1623-30 (2002).<br>3) Trompet, S. et al. Replication of LDL GWAs hits in PROSPER/PHASE as validation for future (pharmacogenetic) analyses. <i>BMC Med Genet</i> 12, 131 (2011). |
| <b>QFS</b>                | Quebec Family Study                                                              |                               | 951   | ≥ 95%   | N/A                                                                                                                                                         | 860   | measured                 | Bouchard, C. et al. Inheritance of the amount and distribution of human body fat. <i>Int J Obes</i> 12, 205-15 (1988).                                                                                                                                                                                                                                                                                                                                                                                                                                                |
| <b>QIMR</b>               | Twin study at Queensland Institute of Medical Research                           | Population-based              | 11930 | ≥ 95%   | 1) age < 18;<br>2) ethnic outliers;<br>3) related individuals and duplicates;<br>4) Missing body weight and height.                                         | 3627  | measured / self-reported | Medland, S.E. et al. Common variants in the trichohyalin gene are associated with straight hair in Europeans. <i>Am J Hum Genet</i> 85, 750-5 (2009).                                                                                                                                                                                                                                                                                                                                                                                                                 |

|                   |                                                                           |                                             |      |       |                                                                                                                                                                               |      |          |                                                                                                                                                                                                                                                  |
|-------------------|---------------------------------------------------------------------------|---------------------------------------------|------|-------|-------------------------------------------------------------------------------------------------------------------------------------------------------------------------------|------|----------|--------------------------------------------------------------------------------------------------------------------------------------------------------------------------------------------------------------------------------------------------|
| <b>RISC</b>       | Relationship between Insulin Sensitivity and Cardiovascular disease Study | Population-based                            | 1566 | >95%  | 1) Non-European Descent<br>2) Sex mismatches                                                                                                                                  | 1031 | measured | Hills, S.A. et al. The EGIR-RISC STUDY (The European group for the study of insulin resistance: relationship between insulin sensitivity and cardiovascular disease risk): I. Methodology and objectives. <i>Diabetologia</i> 47, 566-70 (2004). |
| <b>SHIP-TREND</b> | Study of Health in Pomerania - TREND                                      | Population-based                            | 997  | ≥ 94% | 1) duplicate samples (by estimated IBD)<br>2) reported/genotyped gender mismatch                                                                                              | 986  | measured | Volzke, H. et al. Cohort profile: the study of health in Pomerania. <i>Int J Epidemiol</i> 40, 294-307 (2011).                                                                                                                                   |
| <b>TRAILS</b>     | Tracking Adolescents' Individual Lives Survey                             | Population-based (measured at 18yrs of age) | 1491 | ≥ 95% | 1) heterozygosity >4SD from mean;<br>2) ethnic outliers;<br>3) related individuals and duplicates;<br>4) sex mismatch with database;<br>5) Missing height, age, or sex.       | 1139 | measured | Huisman, M. et al. Cohort profile: the Dutch 'TRacking Adolescents' Individual Lives' Survey'; TRAILS. <i>Int J Epidemiol</i> 37, 1227-35 (2008).                                                                                                |
| <b>TWINGENE</b>   | TWINGENE                                                                  | Population-based                            | 9836 | ≥ 97% | 1) Heterozygosity, $(F - \text{mean}(F))/\text{sd}(Z) \geq 5$<br>2) Sex-check based on the heterozygosity rates on the X-chromosome<br>3) Missing phenotypes used in analysis | 9380 | measured | Hong, Y. et al. Genetic and environmental architecture of the features of the insulin-resistance syndrome. <i>Am J Hum Genet</i> 60, 143-52 (1997).                                                                                              |

\* Call rate to exclude individuals for whom genotyping success rate is less than a certain percentage (to exclude 'bad' samples/DNA)

**Supplementary Table 18.** Information on genotyping methods, quality control of SNPs, imputation, and statistical analysis for genome-wide association study cohort

| Study                        | GENOTYPING                                                            |                            |                    |            |                     |                                       | IMPUTATION          |                    |                    | ASSOCIATION ANALYSIS  |                         |
|------------------------------|-----------------------------------------------------------------------|----------------------------|--------------------|------------|---------------------|---------------------------------------|---------------------|--------------------|--------------------|-----------------------|-------------------------|
|                              | Platform                                                              | Genotype calling algorithm | Inclusion criteria |            |                     | SNPs that met QC criteria             | Imputation software | Inclusion criteria |                    | SNPs in meta-analysis | Analyses software       |
|                              |                                                                       |                            | MAF                | Call rate* | P for HWE           |                                       |                     | MAF                | Imputation quality |                       |                         |
| <b>ACTG</b>                  | Illumina HumanHap650Y and Illumina-1Mduo                              | Beadstudio                 | >1%                | ≥98%       | $>5 \times 10^{-6}$ | 477,986 (650Y); 917,487 (1Mduo)       | BEAGLE              | 0.0002             | info-score≥0.1     | 2,491,886             | PLINK                   |
| <b>AE</b>                    | Affymetrix 5.0                                                        | BRLMM-P                    | ≥3%                | ≥97%       | $>10^{-6}$          | 403,789                               | BEAGLE              | ALL                | ALL                | 2,409,615             | PLINK & GoldenHelix SVS |
| <b>ASCOT</b>                 | Illumina HumanCNV 370                                                 | Beadstudio                 | >0%                | ≥97%       | $>10^{-7}$          | 283,291                               | MACH                | ALL                | r2-hat≥0.30        | 2,477,983             | MACH2QTL                |
| <b>BSA</b>                   | Illumina 550K                                                         | Beadstudio                 | ≥1%                | ≥99%       | $>10^{-4}$          | 514,027                               | MACH                | ≥1%                | r2-hat≥0.30        | 2,557,230             | MERLIN-OFFLINE          |
| <b>B-PROOF</b>               | Illumina OMNIEXPRESS                                                  | GenomeStudio               | ALL                | ≥97.5%     | $>10^{-6}$          | 722,053                               | MACH                | ≥1%                | r2-hat≥0.30        | 2,450,937             | GRIMP                   |
| <b>DESIR</b>                 | Illumina Human CNV370-Duo and Illumina HAP300                         | GenomeStudio               | ≥1%                | ≥95%       | $>10^{-4}$          | 291,609                               | IMPUTE              | ≥1%                | proper-info≥0.40   | 2,544,187             | SNPTEST                 |
| <b>DNBC</b>                  | Illumina 660w-quad                                                    | BeadStudio                 | ≥0.5%              | ≥98%       | $>10^{-3}$          | 518097                                | MACH                | ALL                | ALL                | 2549123               | MACH2QTL                |
| <b>EGCUT-370</b>             | Illumina Human370CNV                                                  | GenomeStudio               | ≥1%                | ≥97%       | $>10^{-6}$          | 320,955                               | IMPUTE              | ≥1%                | proper-info≥0.40   | 2,341,594             | SNPTEST                 |
| <b>EGCUT-OMNI</b>            | Illumina OMNI-Express                                                 | GenomeStudio               | ≥1%                | ≥97%       | $>10^{-6}$          | 647,357                               | IMPUTE              | ≥1%                | proper-info≥0.40   | 2,375,437             | SNPTEST                 |
| <b>ERF</b>                   | Illumina 318K, Illumina 370K and Affymetrix 250K                      | BRLMM, BeadStudio          | ≥1%                | ≥98%       | $>10^{-6}$          | 450,877                               | MACH                | ≥1%                | ALL                | ALL                   | ProbABEL/GenABEL        |
| <b>FamHS</b>                 | Illumina HumMap 550K, Human 610-Quadv1, and Illumina Human 1M-Duov3   | GenCall, BeadStudio        | ≥1%                | ≥98%       | $>10^{-6}$          | 849,551                               | MACH                | ≥1%                | r2-hat≥0.30        | 2,543,887             | Local Software          |
| <b>Health ABC</b>            | Illumina-1Mduo                                                        | Beadchip                   | ≥1%                | ≥97%       | $>10^{-6}$          | 914,263                               | MACH                | NA                 | r2-hat≥0.30        | 2,543,887             | R                       |
| <b>HERITAGE Family Study</b> | Illumina HumanCNV370-Quad v3.0                                        | GenomeStudio               | ≥1%                | ≥99%       | $>10^{-6}$          | 324,607                               | MACH                | ≥1%                | r2-hat≥0.30        | 2,453,887             | ProbABEL                |
| <b>Hypergenes Controls</b>   | Illumina-1Mduo                                                        | GenCall, BeadStudio        | ≥1%                | ≥90%       | $>10^{-7}$          | Center I: 861759<br>Center II: 872576 | MACH                | >0%                | r2-hat≥0.30        | 2,543,887             | Matlab                  |
| <b>Hypergenes Cases</b>      | Illumina-1Mduo                                                        | GenCall, BeadStudio        | ≥1%                | ≥90%       | $>10^{-7}$          | Center I: 861759<br>Center II: 872576 | MACH                | >0%                | r2-hat≥0.30        | 2,543,887             | Matlab                  |
| <b>InCHIANTI</b>             | Illumina 550K                                                         | Birdstudio                 | ≥1%                | ≥99%       | $>10^{-4}$          | 495,343                               | MACH                | ≥1%                | r2-hat≥0.30        | 2,461,088             | MERLIN                  |
| <b>IPM Mount Sinai BioMe</b> | Affymetrix SNP 6.0                                                    | Birdsuite                  | ≥1%                | ≥95%       | $>10^{-3}$          | 665,889                               | MACH                | ALL                | ALL                | 3,021,329             | MACH2QTL                |
| <b>Lifelines</b>             | Illumina Cyto SNP12 v2                                                | GenomeStudio               | ≥1%                | ≥95%       | $>10^{-4}$          | 257,581                               | BEAGLE              | >0%                | ALL                | 2,472,812             | PLINK                   |
| <b>LLS</b>                   | Illumina Infinium HD Human660W-Quad and Infinium HD Human OmniExpress | BeadStudio                 | ≥1%                | ≥95%       | $>10^{-4}$          | 516,712                               | IMPUTE              | ≥1%                | proper-info≥0.40   | 3,801,289             | QT-assoc                |

|                           |                                                   |                 |     |                              |                   |                                        |         |     |                  |           |           |
|---------------------------|---------------------------------------------------|-----------------|-----|------------------------------|-------------------|----------------------------------------|---------|-----|------------------|-----------|-----------|
| <b>LOLIPOP_EW610</b>      | Illumina Human610                                 | BeadStudio      | ≥1% | ≥90%                         | >10 <sup>-6</sup> | 544,620                                | MACH    | ALL | ALL              | 2,543,887 | MACH2QTL  |
| <b>LOLIPOP_EWA</b>        | Affymetrix 500K                                   | BRLMN           | ≥1% | ≥90%                         | >10 <sup>-6</sup> | 374,773                                | MACH    | ALL | ALL              | 2557252   | MACH2QTL  |
| <b>LOLIPOP_EWP</b>        | Perlegen custom                                   | Perlegen custom | ≥1% | ≥90%                         | >10 <sup>-6</sup> | 184,469                                | MACH    | ALL | ALL              | 2,177,742 | MACH2QTL  |
| <b>NELSON</b>             | Illumina Quad610 BeadChip                         | GenomeStudio    | ≥5% | ≥98%                         | >10 <sup>-3</sup> | 581,712                                | BEAGLE  | ALL | ALL              | 2,543,807 | PLINK     |
| <b>PLCO2 controls</b>     | Illumina HumanHap 550K and Illumina HumanHap 610K | BeadStudio      | ALL | ≥90%                         | none              | 525,262                                | IMPUTE  | ≥1% | proper-info≥0.40 | 2,538,067 | SNPTEST   |
| <b>PLCO2 cases</b>        | Illumina HumanHap 550K and Illumina HumanHap 610K | BeadStudio      | ALL | ≥90%                         | none              | 525,262                                | IMPUTE  | ≥1% | proper-info≥0.40 | 2,564,030 | SNPTEST   |
| <b>PREVEND</b>            | Illumina cytoSNP12 v2                             | GenomeStudio    | ≥1% | >95%                         | >10 <sup>-5</sup> | 232,571                                | BEAGLE  | ≥1% | ALL              | 2289210   | PLINK     |
| <b>PROCARDIS</b>          | Illumina 1M, Illumina 610K                        | Beadstudio      | ≥1% | ≥95%                         | >10 <sup>-6</sup> | 460,920                                | MACH    | ALL | ALL              | 2,543,887 | STATA     |
| <b>PROSPER/<br/>PHASE</b> | Illumina 660K beadchip                            | Beadstudio      | ≥1% | ≥97.5%                       | >10 <sup>-6</sup> | 557,192                                | MACH    | ALL | ALL              | 2,543,887 | ProbABEL  |
| <b>QFS</b>                | Illumina 610-Quad chip                            | BeadStudio      | ≥1% | ≥95%                         | >10 <sup>-4</sup> | 543,713                                | MACH    | ≥1% | r2-hat≥0.30      | 2,562,194 | GWAF      |
| <b>QIMR</b>               | Illumina HumanHap 370 / 610                       | BeadStudio      | ≥1% | ≥95%                         | >10 <sup>-6</sup> | 271,069                                | MACH    | ≥1% | r2-hat≥0.30      | 2,543,887 | PLINK     |
| <b>RISC</b>               | Affymetrix 6.0                                    | Birdseed        | >1% | ≥98%                         | >10 <sup>-4</sup> | 747,423                                | MACH    | >1% | r2-hat≥0.30      | 2,500,497 | MACH2QTL  |
| <b>SHIP-TREND</b>         | Illumina Human Omni 2.5                           | GenCall         | ALL | >90%                         | >10 <sup>-4</sup> | 1,782,967                              | IMPUTE  | ALL | ALL              | 3,437,411 | QUICKTEST |
| <b>TRAILS</b>             | Illumina Cyto SNP12 v2                            | GenomeStudio    | ≥1% | ≥95%                         | >10 <sup>-4</sup> | 260,077                                | IMPUTE2 | ALL | ALL              | 2,631,501 | SNPTEST   |
| <b>TWINGENE</b>           | Illumina HumanOmniExpress                         | GenomeStudio    | ≥1% | ≥97%                         | >10 <sup>-7</sup> | 644556                                 | IMPUTE2 | ALL | ALL              | 2,585,373 | PLINK     |
| <b>TwinsUK</b>            | Illumina HumanHap300 and Illumina HumanHap610Q    | Illuminus       | ≥1% | >97% (MAF>5%);<br>>99% (<5%) | >10 <sup>-6</sup> | 303,940 (Hap300);<br>553,487 (Hap610Q) | IMPUTE  | ≥1% | proper-info≥0.40 | 3,044,097 | SNPTEST   |

\* Call rate to exclude SNPs for which less than a certain percentage of individuals were successfully genotyped (i.e. to exclude 'bad' SNPs)

**Supplementary Table 19: Study-specific descriptive statistics genome-wide association study cohorts**

| Study   | Trait                    | Men  |       |       |        |       |       |                      |                         | Women |       |       |        |       |       |                      |                         |
|---------|--------------------------|------|-------|-------|--------|-------|-------|----------------------|-------------------------|-------|-------|-------|--------|-------|-------|----------------------|-------------------------|
|         |                          | n    | mean  | SD    | median | min   | max   | correlation with BMI | correlation with height | n     | mean  | SD    | median | min   | max   | Correlation with BMI | correlation with height |
| ACTG    | Age (yrs)                | 1055 | 39.2  | 9.20  | 39.0   | 17.0  | 77.0  | NA                   | -0.03                   | NA    | NA    | NA    | NA     | NA    | NA    | NA                   | NA                      |
|         | BMI (kg/m <sup>2</sup> ) | NA   | NA    | NA    | NA     | NA    | NA    | NA                   | NA                      | NA    | NA    | NA    | NA     | NA    | NA    | NA                   | NA                      |
|         | Weight (kg)              | NA   | NA    | NA    | NA     | NA    | NA    | NA                   | NA                      | NA    | NA    | NA    | NA     | NA    | NA    | NA                   | NA                      |
|         | Height (m)               | 1055 | 1.8   | 0.07  | 1.8    | 1.4   | 2.0   | NA                   | 1.00                    | NA    | NA    | NA    | NA     | NA    | NA    | NA                   | NA                      |
|         | WC (cm)                  | NA   | NA    | NA    | NA     | NA    | NA    | NA                   | NA                      | NA    | NA    | NA    | NA     | NA    | NA    | NA                   | NA                      |
|         | Hip (cm)                 | NA   | NA    | NA    | NA     | NA    | NA    | NA                   | NA                      | NA    | NA    | NA    | NA     | NA    | NA    | NA                   | NA                      |
| AE      | Age (yrs)                | 469  | 68.1  | 8.88  | 69.0   | 39.0  | 88.0  | -0.06                | -0.20                   | 217   | 68.2  | 9.60  | 69.0   | 37.0  | 92.0  | -0.05                | -0.05                   |
|         | BMI (kg/m <sup>2</sup> ) | 433  | 26.3  | 3.18  | 26.0   | 17.6  | 39.9  | 1.00                 | -0.01                   | 189   | 26.4  | 4.71  | 26.0   | 15.2  | 50.7  | 1.00                 | -0.19                   |
|         | Weight (kg)              | 435  | 81.6  | 11.60 | 80.0   | 49.0  | 130.0 | 0.81                 | 0.53                    | 191   | 71.4  | 12.95 | 70.0   | 43.0  | 133.0 | 0.90                 | 0.21                    |
|         | Height (m)               | 433  | 1.8   | 0.07  | 1.8    | 1.6   | 2.0   | -0.01                | 1.00                    | 191   | 1.6   | 0.06  | 1.7    | 1.5   | 1.8   | -0.19                | 1.00                    |
|         | WC (cm)                  | NA   | NA    | NA    | NA     | NA    | NA    | NA                   | NA                      | NA    | NA    | NA    | NA     | NA    | NA    | NA                   | NA                      |
|         | Hip (cm)                 | NA   | NA    | NA    | NA     | NA    | NA    | NA                   | NA                      | NA    | NA    | NA    | NA     | NA    | NA    | NA                   | NA                      |
|         | WHR (cm/cm)              | NA   | NA    | NA    | NA     | NA    | NA    | NA                   | NA                      | NA    | NA    | NA    | NA     | NA    | NA    | NA                   | NA                      |
| ASCOT   | Age (yrs)                | 3122 | 63.5  | 8.2   | 64.0   | 40.0  | 80.0  | -0.22                | -0.18                   | 673   | 64.7  | 7.6   | 65.0   | 41.0  | 80.0  | -0.21                | -0.13                   |
|         | BMI (kg/m <sup>2</sup> ) | 3122 | 28.9  | 4.6   | 28.4   | 15.0  | 88.8  | 1.00                 | -0.11                   | 673   | 29.5  | 5.7   | 28.7   | 16.5  | 52.1  | 1.00                 | -0.11                   |
|         | Weight (kg)              | 3122 | 87.2  | 14.8  | 85.4   | 44.0  | 188.0 | 0.84                 | 0.43                    | 673   | 75.3  | 15.1  | 72.8   | 43.6  | 150.6 | 0.91                 | 0.30                    |
|         | Height (m)               | 3122 | 1.7   | 0.1   | 1.7    | 1.0   | 2.0   | -0.11                | 1.00                    | 673   | 1.6   | 0.1   | 1.6    | 1.3   | 1.9   | -0.11                | 1.00                    |
|         | WC (cm)                  | NA   | NA    | NA    | NA     | NA    | NA    | NA                   | NA                      | NA    | NA    | NA    | NA     | NA    | NA    | NA                   | NA                      |
|         | Hip (cm)                 | NA   | NA    | NA    | NA     | NA    | NA    | NA                   | NA                      | NA    | NA    | NA    | NA     | NA    | NA    | NA                   | NA                      |
|         | WHR (cm/cm)              | NA   | NA    | NA    | NA     | NA    | NA    | NA                   | NA                      | NA    | NA    | NA    | NA     | NA    | NA    | NA                   | NA                      |
| BLSA    | Age (yrs)                | 462  | 71.3  | 15.70 | 74.0   | 22.0  | 96.0  | -0.20                | -0.45                   | 382   | 66.5  | 17.15 | 67.0   | 21.0  | 97.0  | -0.01                | -0.51                   |
|         | BMI (kg/m <sup>2</sup> ) | 462  | 27.6  | 4.52  | 26.7   | 19.1  | 46.7  | 1.00                 | 0.01                    | 382   | 25.9  | 4.83  | 24.9   | 18.2  | 46.9  | 1.00                 | -0.01                   |
|         | Weight (kg)              | 462  | 84.2  | 16.01 | 82.0   | 53.1  | 170.3 | 0.86                 | 0.48                    | 382   | 68.3  | 13.95 | 66.0   | 41.8  | 122.4 | 0.88                 | 0.42                    |
|         | Height (m)               | 462  | 1.7   | 0.07  | 1.7    | 1.5   | 2.0   | 0.01                 | 1.00                    | 382   | 1.6   | 0.07  | 1.6    | 1.4   | 1.8   | -0.01                | 1.00                    |
|         | WC (cm)                  | 462  | 98.6  | 12.02 | 98.0   | 68.0  | 146.5 | 0.83                 | 0.14                    | 382   | 84.4  | 11.63 | 84.0   | 57.0  | 123.0 | 0.81                 | 0.02                    |
|         | Hip (cm)                 | 462  | 103.5 | 9.71  | 102.0  | 82.0  | 155.5 | 0.80                 | 0.32                    | 382   | 103.1 | 10.58 | 101.9  | 70.1  | 145.0 | 0.85                 | 0.25                    |
|         | WHR (cm/cm)              | 462  | 1.0   | 0.06  | 1.0    | 0.8   | 1.1   | 0.41                 | -0.16                   | 382   | 0.8   | 0.07  | 0.8    | 0.6   | 1.1   | 0.29                 | -0.23                   |
| B-PROOF | Age (yrs)                | 1459 | 73.4  | 6.1   | 72.0   | 63.0  | 98.0  | 0.85                 | -0.23                   | 1460  | 74.9  | 6.8   | 74.0   | 63.0  | 97.0  | -0.21                | -0.34                   |
|         | BMI (kg/m <sup>2</sup> ) | 1456 | 26.8  | 3.4   | 26.4   | 17.0  | 56.0  | 1.00                 | -0.04                   | 1445  | 27.5  | 4.5   | 27.0   | 14.0  | 47.0  | 1.00                 | -0.11                   |
|         | Weight (kg)              | 1456 | 83.1  | 11.9  | 82.0   | 48.0  | 180.0 | 0.85                 | 0.48                    | 1447  | 72.6  | 12.5  | 72.0   | 37.0  | 135.0 | 0.89                 | 0.36                    |
|         | Height (cm)              | 1456 | 175.9 | 6.6   | 176.0  | 151.4 | 197.5 | -0.04                | 1.00                    | 1446  | 162.6 | 6.5   | 163.0  | 138.7 | 183.4 | -0.11                | 1.00                    |
| DESIR   | Age (yrs)                | 178  | 52.7  | 5.59  | 52.0   | 45.0  | 64.0  | 0.02                 | -0.21                   | 538   | 49.0  | 8.55  | 49.0   | 30.0  | 65.0  | 0.44                 | -0.20                   |
|         | BMI (kg/m <sup>2</sup> ) | 178  | 23.2  | 1.16  | 23.3   | 20.4  | 24.9  | 1.00                 | 0.08                    | 538   | 21.4  | 1.85  | 21.2   | 16.6  | 24.9  | 1.00                 | -0.11                   |
|         | Weight (kg)              | 178  | 69.5  | 6.49  | 70.0   | 51.0  | 89.0  | 0.60                 | 0.85                    | 538   | 54.8  | 5.86  | 55.0   | 40.0  | 71.0  | 0.74                 | 0.58                    |
|         | Height (m)               | 178  | 173.1 | 6.46  | 173.0  | 156.0 | 195.0 | 0.08                 | 1.00                    | 538   | 160.1 | 5.80  | 160.0  | 145.0 | 177.0 | -0.11                | 1.00                    |
|         | WC (cm)                  | 177  | 84.6  | 5.38  | 84.0   | 73.0  | 101.0 | 0.50                 | 0.41                    | 536   | 70.9  | 5.79  | 70.0   | 57.0  | 98.0  | 0.69                 | 0.12                    |
|         | Hip (cm)                 | 177  | 95.1  | 4.05  | 95.0   | 84.0  | 107.0 | 0.45                 | 0.62                    | 536   | 93.0  | 5.42  | 93.0   | 77.0  | 108.0 | 0.65                 | 0.28                    |
|         | WHR (cm/cm)              | 177  | 0.9   | 0.04  | 0.9    | 0.8   | 1.0   | 0.23                 | 0.01                    | 537   | 0.8   | 0.05  | 0.8    | 0.6   | 1.1   | 0.28                 | -0.06                   |

|                   |                          |      |       |       |       |       |       |       |       |      |       |        |       |       |       |       |       |
|-------------------|--------------------------|------|-------|-------|-------|-------|-------|-------|-------|------|-------|--------|-------|-------|-------|-------|-------|
| <b>DNBC</b>       | Age (yrs)                | NA   | NA    | NA    | NA    | NA    | NA    | NA    | NA    | 1802 | 29.3  | 4.20   | 29.2  | 16.3  | 43.5  | 0.02  | 0.03  |
|                   | BMI (kg/m <sup>2</sup> ) | NA   | NA    | NA    | NA    | NA    | NA    | NA    | NA    | 1802 | 23.5  | 4.31   | 22.6  | 15.2  | 47.8  | 1.00  | -0.06 |
|                   | Weight (kg)              | NA   | NA    | NA    | NA    | NA    | NA    | NA    | NA    | 1802 | 67.1  | 12.93  | 65.0  | 36.0  | 135.0 | 0.89  | 0.36  |
|                   | Height (m)               | NA   | NA    | NA    | NA    | NA    | NA    | NA    | NA    | 1802 | 1.7   | 0.06   | 1.7   | 1.5   | 1.9   | -0.06 | 1.00  |
|                   | WC (cm)                  | NA   | NA    | NA    | NA    | NA    | NA    | NA    | NA    | NA   | NA    | NA     | NA    | NA    | NA    | NA    | NA    |
|                   | Hip (cm)                 | NA   | NA    | NA    | NA    | NA    | NA    | NA    | NA    | NA   | NA    | NA     | NA    | NA    | NA    | NA    | NA    |
|                   | WHR (cm/cm)              | NA   | NA    | NA    | NA    | NA    | NA    | NA    | NA    | NA   | NA    | NA     | NA    | NA    | NA    | NA    | NA    |
| <b>EGCUT_370</b>  | Age (yrs)                | 416  | 37.0  | 15.60 | 33.0  | 18.0  | 87.0  | 0.28  | -0.47 | 450  | 37.3  | 15.61  | 34.0  | 18.0  | 83.0  | 0.42  | -0.32 |
|                   | BMI (kg/m <sup>2</sup> ) | 416  | 25.6  | 4.13  | 25.2  | 17.3  | 48.3  | 1.00  | -0.11 | 450  | 24.4  | 4.78   | 23.4  | 17.0  | 42.9  | 1.00  | -0.18 |
|                   | Weight (kg)              | 416  | 83.8  | 14.45 | 83.0  | 50.0  | 160.0 | 0.89  | 0.35  | 450  | 67.8  | 13.20  | 66.0  | 40.0  | 136.0 | 0.92  | 0.20  |
|                   | Height (m)               | 416  | 180.9 | 7.09  | 181.0 | 158.0 | 204.0 | -0.11 | 1.00  | 450  | 166.7 | 6.19   | 167.0 | 144.0 | 184.0 | -0.18 | 1.00  |
|                   | WC (cm)                  | 416  | 90.5  | 11.94 | 89.0  | 64.0  | 148.0 | 0.86  | -0.01 | 450  | 79.1  | 11.72  | 77.0  | 46.0  | 121.0 | 0.86  | -0.10 |
|                   | Hip (cm)                 | 416  | 102.0 | 7.17  | 101.0 | 82.0  | 148.0 | 0.82  | 0.18  | 450  | 102.0 | 9.63   | 100.0 | 78.0  | 167.0 | 0.84  | 0.06  |
|                   | WHR (cm/cm)              | 416  | 0.9   | 0.08  | 0.9   | 0.7   | 1.1   | 0.63  | -0.16 | 450  | 0.8   | 0.07   | 0.8   | 0.5   | 1.0   | 0.52  | -0.23 |
| <b>EGCUT_OMNI</b> | Age (yrs)                | 517  | 46.4  | 15.77 | 46.0  | 20.0  | 74.0  | 0.22  | -0.37 | 839  | 67.9  | 21.62  | 80.0  | 18.0  | 103.0 | 0.21  | -0.49 |
|                   | BMI (kg/m <sup>2</sup> ) | 517  | 26.9  | 4.44  | 26.5  | 18.1  | 44.1  | 1.00  | -0.10 | 839  | 27.1  | 5.40   | 26.3  | 11.5  | 74.5  | 1.00  | -0.11 |
|                   | Weight (kg)              | 517  | 86.6  | 15.21 | 85.0  | 57.0  | 153.0 | 0.89  | 0.35  | 839  | 70.3  | 14.53  | 69.0  | 28.0  | 172.0 | 0.90  | 0.32  |
|                   | Height (m)               | 517  | 179.4 | 7.01  | 180.0 | 158.0 | 205.0 | -0.10 | 1.00  | 839  | 161.1 | 7.28   | 161.0 | 140.0 | 193.0 | -0.11 | 1.00  |
|                   | WC (cm)                  | 517  | 95.7  | 13.05 | 95.0  | 56.0  | 144.0 | 0.87  | 0.02  | 839  | 88.5  | 13.32  | 88.0  | 60.0  | 160.0 | 0.79  | 0.03  |
|                   | Hip (cm)                 | 517  | 103.3 | 8.88  | 103.0 | 58.0  | 136.0 | 0.71  | 0.19  | 839  | 104.7 | 11.74  | 103.0 | 63.0  | 172.0 | 0.77  | 0.15  |
|                   | WHR (cm/cm)              | 517  | 0.9   | 0.09  | 0.9   | 0.7   | 1.2   | 0.59  | -0.15 | 839  | 0.8   | 0.08   | 0.8   | 0.6   | 1.6   | 0.35  | -0.13 |
| <b>ERF</b>        | Age (yrs)                | 1218 | 49.5  | 14.21 | 49.6  | 17.6  | 86.5  | 0.15  | -0.46 | 1508 | 48.3  | 14.42  | 48.0  | 18.0  | 86.1  | 0.25  | -0.42 |
|                   | BMI (kg/m <sup>2</sup> ) | 1218 | 27.2  | 4.14  | 26.7  | 15.9  | 50.8  | 1.00  | -0.08 | 1507 | 26.7  | 5.16   | 25.7  | 15.5  | 61.8  | 1.00  | -0.12 |
|                   | Weight (kg)              | 1218 | 83.1  | 13.92 | 81.6  | 41.9  | 154.7 | 0.87  | 0.42  | 1507 | 69.7  | 14.07  | 67.2  | 42.1  | 161.0 | 0.91  | 0.29  |
|                   | Height (m)               | 1218 | 174.7 | 7.21  | 174.7 | 152.2 | 196.5 | -0.08 | 1.00  | 1508 | 161.8 | 6.56   | 161.6 | 139.3 | 182.8 | -0.12 | 1.00  |
|                   | WC (cm)                  | 1218 | 94.2  | 11.70 | 93.0  | 62.5  | 146.6 | 0.87  | -0.03 | 1503 | 82.3  | 12.70  | 80.1  | 54.3  | 149.0 | 0.89  | -0.06 |
|                   | Hip (cm)                 | 1218 | 99.4  | 7.27  | 98.6  | 76.5  | 147.5 | 0.85  | 0.27  | 1504 | 79.0  | 173.00 | 100.3 | 101.6 | 9.7   | 0.86  | 0.17  |
|                   | WHR (cm/cm)              | 1218 | 0.9   | 0.08  | 0.9   | 0.7   | 1.2   | 0.56  | -0.28 | 1503 | 0.8   | 0.08   | 0.8   | 0.5   | 1.3   | 0.52  | -0.25 |
| <b>FamHS</b>      | Age (yrs)                | 632  | 48.1  | 13.76 | 46.5  | 25.6  | 85.7  | 0.15  | -0.24 | 831  | 47.5  | 12.94  | 45.2  | 25.7  | 81.4  | 0.19  | -0.26 |
|                   | BMI (kg/m <sup>2</sup> ) | 632  | 27.8  | 4.32  | 27.2  | 18.4  | 46.2  | 1.00  | -0.09 | 831  | 27.1  | 6.09   | 26.1  | 16.5  | 55.0  | 1.00  | -0.12 |
|                   | Weight (kg)              | 632  | 87.1  | 14.63 | 85.3  | 55.3  | 140.6 | 0.88  | 0.39  | 831  | 72.3  | 16.62  | 68.9  | 41.7  | 144.2 | 0.94  | 0.22  |
|                   | Height (m)               | 632  | 177.0 | 6.92  | 177.0 | 157.0 | 203.0 | -0.09 | 1.00  | 831  | 163.3 | 6.45   | 163.0 | 141.0 | 196.0 | -0.12 | 1.00  |
|                   | WC (cm)                  | 631  | 99.3  | 12.54 | 99.0  | 44.0  | 147.0 | 0.86  | 0.06  | 831  | 92.6  | 16.93  | 90.0  | 27.0  | 170.0 | 0.89  | -0.01 |
|                   | Hip (cm)                 | 631  | 104.2 | 8.32  | 104.0 | 53.0  | 140.0 | 0.82  | 0.27  | 831  | 106.8 | 12.38  | 104.0 | 59.0  | 162.0 | 0.91  | 0.10  |
|                   | WHR (cm/cm)              | 631  | 1.0   | 0.08  | 1.0   | 0.4   | 1.8   | 0.47  | -0.17 | 831  | 0.9   | 0.09   | 0.9   | 0.3   | 1.6   | 0.52  | -0.15 |
| <b>Health ABC</b> | Age (yrs)                | 873  | 73.9  | 2.87  | 74.0  | 69.0  | 80.0  | -0.08 | -0.13 | 782  | 73.6  | 2.80   | 73.0  | 69.0  | 80.0  | -0.08 | -0.15 |
|                   | BMI (kg/m <sup>2</sup> ) | 873  | 27.1  | 3.69  | 26.6  | 17.6  | 44.2  | 1.00  | -0.05 | 782  | 26.1  | 4.53   | 25.6  | 15.6  | 44.7  | 1.00  | -0.09 |
|                   | Weight (kg)              | 873  | 81.6  | 12.39 | 80.0  | 52.2  | 134.5 | 0.87  | 0.44  | 782  | 66.5  | 12.09  | 65.1  | 40.8  | 123.0 | 0.92  | 0.31  |
|                   | Height (m)               | 873  | 1.7   | 0.06  | 1.7   | 1.5   | 1.9   | -0.05 | 1.00  | 782  | 1.6   | 0.06   | 1.6   | 1.4   | 1.8   | -0.09 | 1.00  |
|                   | WC (cm)                  | 873  | 102.1 | 10.98 | 101.3 | 59.4  | 224.7 | 0.81  | 0.16  | 782  | 96.1  | 12.35  | 96.4  | 65.0  | 144.0 | 0.75  | 0.13  |
|                   | Hip (cm)                 | n/a  | n/a   | n/a   | n/a   | n/a   | n/a   | n/a   | n/a   | n/a  | n/a   | n/a    | n/a   | n/a   | n/a   | n/a   | n/a   |
|                   | WHR (cm/cm)              | n/a  | n/a   | n/a   | n/a   | n/a   | n/a   | n/a   | n/a   | n/a  | n/a   | n/a    | n/a   | n/a   | n/a   | n/a   | n/a   |
| <b>HERITAGE</b>   | Age (yrs)                | 244  | 36.5  | 14.95 | 31.9  | 17.0  | 64.3  | 0.35  | -0.21 | 256  | 35.1  | 14.14  | 31.2  | 17.2  | 65.2  | 0.41  | -0.11 |
|                   | BMI (kg/m <sup>2</sup> ) | 244  | 26.7  | 4.86  | 25.8  | 17.3  | 44.2  | 1.00  | -0.06 | 256  | 25.0  | 4.89   | 23.9  | 17.0  | 47.5  | 1.00  | -0.08 |

|                            |                          |      |       |       |       |       |       |       |       |      |       |       |       |       |       |       |       |
|----------------------------|--------------------------|------|-------|-------|-------|-------|-------|-------|-------|------|-------|-------|-------|-------|-------|-------|-------|
|                            | Weight (kg)              | 244  | 84.4  | 16.20 | 81.2  | 54.0  | 140.2 | 0.93  | 0.32  | 256  | 67.1  | 13.69 | 64.0  | 39.6  | 115.7 | 0.92  | 0.31  |
|                            | Height (cm)              | 244  | 177.8 | 6.36  | 177.9 | 160.0 | 196.8 | -0.06 | 1.00  | 256  | 163.6 | 6.41  | 163.7 | 147.4 | 184.7 | -0.08 | 1.00  |
|                            | WC (cm)                  | 244  | 94.7  | 13.89 | 93.6  | 69.2  | 135.6 | 0.95  | 0.06  | 256  | 86.2  | 14.53 | 84.7  | 64.2  | 143.8 | 0.89  | 0.05  |
|                            | Hip (cm)                 | 244  | 103.1 | 8.80  | 102.1 | 86.5  | 131.1 | 0.91  | 0.24  | 256  | 102.5 | 10.67 | 100.3 | 81.3  | 146.8 | 0.91  | 0.20  |
|                            | WHR (cm/cm)              | 244  | 0.9   | 0.07  | 0.9   | 0.8   | 1.1   | 0.75  | -0.16 | 256  | 0.8   | 0.08  | 0.8   | 0.7   | 1.1   | 0.60  | -0.14 |
| <b>HYPERGENES Controls</b> | Age (yrs)                | 1105 | 62.2  | 10.6  | 59.8  | 28.0  | 98.0  | -0.09 | -0.12 | 791  | 64.2  | 11.2  | 61.0  | 44.9  | 113.0 | -0.15 | -0.14 |
|                            | BMI (kg/m <sup>2</sup> ) | 1092 | 26.0  | 3.3   | 25.6  | 10.2  | 40.8  | 1.00  | -0.13 | 776  | 25.0  | 3.7   | 24.6  | 16.5  | 41.4  | 1.00  | -0.15 |
|                            | Weight (kg)              | 1119 | 76.4  | 11.5  | 75.0  | 29.0  | 186.0 | 0.82  | 0.46  | 793  | 64.3  | 10.2  | 63.0  | 41.0  | 110.0 | 0.87  | 0.35  |
|                            | Height (m)               | 1092 | 1.7   | 0.1   | 1.7   | 1.5   | 2.0   | -0.13 | 1.00  | 776  | 1.6   | 0.1   | 1.6   | 1.4   | 1.8   | -0.15 | 1.00  |
|                            | WC (cm)                  | 178  | 95.6  | 10.7  | 93.7  | 58.0  | 140.0 | 0.75  | 0.27  | 192  | 84.7  | 10.5  | 82.4  | 62.8  | 119.8 | 0.81  | 0.18  |
|                            | Hip (cm)                 | 178  | 102.8 | 6.8   | 102.6 | 87.0  | 137.0 | 0.72  | 0.32  | 192  | 103.3 | 8.1   | 102.5 | 84.0  | 134.5 | 0.83  | 0.25  |
|                            | WHR (cm/cm)              | 178  | 0.93  | 0.06  | 0.93  | 0.66  | 1.09  | 0.57  | 0.14  | 192  | 0.82  | 0.07  | 0.81  | 0.68  | 1.19  | 0.40  | 0.04  |
| <b>HYPERGENES Controls</b> | Age (yrs)                | 1197 | 49.4  | 10.4  | 50.0  | 17.6  | 84.0  | 0.04  | -0.33 | 602  | 48.5  | 9.6   | 49.0  | 18.4  | 93.0  | 0.10  | -0.19 |
|                            | BMI (kg/m <sup>2</sup> ) | 1208 | 27.4  | 3.5   | 27.1  | 16.0  | 47.4  | 1.00  | -0.08 | 621  | 26.9  | 5.0   | 26.3  | 17.5  | 52.3  | 1.00  | -0.08 |
|                            | Weight (kg)              | 1209 | 81.4  | 12.1  | 80.0  | 49.0  | 139.5 | 0.82  | 0.51  | 623  | 68.8  | 13.7  | 67.0  | 44.0  | 164.0 | 0.89  | 0.37  |
|                            | Height (m)               | 1208 | 1.7   | 0.1   | 1.7   | 1.5   | 2.0   | -0.08 | 1.00  | 621  | 1.6   | 0.1   | 1.6   | 1.4   | 2.0   | -0.08 | 1.00  |
|                            | WC (cm)                  | 214  | 97.7  | 11.7  | 97.0  | 71.0  | 139.0 | 0.87  | 0.17  | 189  | 89.2  | 13.7  | 88.0  | 61.0  | 133.0 | 0.89  | 0.06  |
|                            | Hip (cm)                 | 214  | 104.8 | 9.8   | 104.0 | 86.0  | 180.0 | 0.71  | 0.28  | 189  | 107.5 | 11.5  | 105.0 | 88.5  | 158.0 | 0.91  | 0.11  |
|                            | WHR (cm/cm)              | 214  | 0.93  | 0.07  | 0.94  | 0.52  | 1.15  | 0.47  | -0.05 | 189  | 0.8   | 0.1   | 0.8   | 0.6   | 1.0   | 0.46  | -0.03 |
| <b>inCHIANTI</b>           | Age (yrs)                | 513  | 66.6  | 15.31 | 70.0  | 23.0  | 94.0  | 0.03  | -0.50 | 625  | 68.3  | 15.14 | 71.0  | 21.0  | 95.0  | 0.20  | -0.50 |
|                            | BMI (kg/m <sup>2</sup> ) | 511  | 27.0  | 3.40  | 27.0  | 18.1  | 37.4  | 1.00  | 0.02  | 624  | 27.3  | 4.67  | 27.0  | 18.0  | 46.6  | 1.00  | -0.21 |
|                            | Weight (kg)              | 511  | 75.7  | 12.03 | 75.5  | 44.0  | 120.0 | 0.80  | 0.61  | 624  | 64.9  | 11.44 | 64.3  | 41.0  | 107.5 | 0.85  | 0.32  |
|                            | Height (m)               | 513  | 167.1 | 7.98  | 167.0 | 142.0 | 193.0 | 0.02  | 1.00  | 625  | 154.3 | 7.36  | 155.0 | 135.0 | 176.0 | -0.21 | 1.00  |
|                            | WC (cm)                  | 499  | 94.5  | 9.34  | 95.0  | 65.0  | 126.0 | 0.79  | 0.20  | 611  | 88.8  | 11.78 | 89.0  | 58.0  | 124.0 | 0.84  | -0.08 |
|                            | Hip (cm)                 | 499  | 99.2  | 7.30  | 99.0  | 75.0  | 140.0 | 0.73  | 0.33  | 611  | 101.6 | 9.76  | 101.0 | 75.0  | 166.0 | 0.81  | 0.09  |
|                            | WHR (cm/cm)              | 499  | 1.0   | 0.06  | 1.0   | 0.6   | 1.2   | 0.42  | -0.09 | 611  | 0.9   | 0.07  | 0.9   | 0.5   | 1.1   | 0.40  | -0.25 |
| <b>IPM EA controls</b>     | Age (yrs)                | 334  | 58.0  | 13.59 | 59.0  | 26.0  | 88.0  | 0.14  | -0.26 | 170  | 54.0  | 16.25 | 55.0  | 24.0  | 87.0  | 0.28  | -0.29 |
|                            | BMI (kg/m <sup>2</sup> ) | 334  | 27.4  | 5.08  | 26.5  | 18.4  | 45.6  | 1.00  | -0.05 | 170  | 27.6  | 7.45  | 25.9  | 15.8  | 62.0  | 1.00  | -0.20 |
|                            | Weight (kg)              | 334  | 86.4  | 17.08 | 81.8  | 51.8  | 148.2 | 0.88  | 0.38  | 170  | 72.9  | 19.48 | 68.2  | 41.8  | 159.1 | 0.95  | 0.10  |
|                            | Height (m)               | 334  | 1.8   | 0.07  | 1.8   | 1.5   | 2.0   | -0.05 | 1.00  | 170  | 1.6   | 0.07  | 1.6   | 1.4   | 1.9   | -0.20 | 1.00  |
| <b>IPM EA cases</b>        | Age (yrs)                | 138  | 67.3  | 11.16 | 67.5  | 34.0  | 93.0  | -0.15 | -0.03 | 62   | 69.7  | 11.55 | 69.0  | 34.0  | 90.0  | -0.22 | -0.24 |
|                            | BMI (kg/m <sup>2</sup> ) | 138  | 28.3  | 5.75  | 27.2  | 15.2  | 48.9  | 1.00  | -0.02 | 62   | 28.6  | 6.74  | 27.2  | 16.6  | 48.7  | 1.00  | -0.02 |
|                            | Weight (kg)              | 138  | 87.8  | 19.30 | 83.9  | 45.5  | 145.5 | 0.91  | 0.36  | 62   | 73.9  | 17.81 | 70.0  | 43.6  | 125.0 | 0.94  | 0.26  |
|                            | Height (m)               | 138  | 1.8   | 0.07  | 1.8   | 1.6   | 1.9   | -0.02 | 1.00  | 62   | 1.6   | 0.06  | 1.6   | 1.5   | 1.8   | -0.02 | 1.00  |
| <b>Lifelines</b>           | Age (yrs)                | 3480 | 48.1  | 11.30 | 47.8  | 19.6  | 87.6  | 0.16  | -0.25 | 4641 | 44.0  | 11.06 | 47.2  | 18.1  | 89.0  | 0.21  | -0.28 |
|                            | BMI (kg/m <sup>2</sup> ) | 3479 | 26.6  | 3.64  | 26.2  | 14.4  | 48.9  | 1.00  | -0.09 | 4639 | 25.7  | 4.69  | 25.1  | 13.9  | 51.8  | 1.00  | -0.17 |
|                            | Weight (kg)              | 3479 | 88.3  | 13.25 | 87.0  | 49.5  | 165.0 | 0.83  | 0.43  | 4639 | 73.9  | 13.58 | 72.0  | 42.5  | 152.0 | 0.88  | 0.27  |
|                            | Height (m)               | 3479 | 182.1 | 6.70  | 182.0 | 158.0 | 208.0 | -0.09 | 1.00  | 4639 | 169.7 | 6.42  | 169.0 | 145.0 | 193.0 | -0.17 | 1.00  |
|                            | WC (cm)                  | 3479 | 96.4  | 10.70 | 96.0  | 65.0  | 158.0 | 0.84  | 0.08  | 4638 | 86.8  | 12.25 | 86.5  | 58.0  | 146.0 | 0.83  | -0.02 |
|                            | Hip (cm)                 | 3479 | 100.2 | 7.44  | 100.0 | 73.0  | 163.0 | 0.70  | 0.30  | 4637 | 100.7 | 10.32 | 100.0 | 69.0  | 181.0 | 0.84  | 0.08  |
|                            | WHR (cm/cm)              | 3479 | 1.0   | 0.07  | 1.0   | 0.6   | 1.3   | 0.58  | -0.15 | 4637 | 0.9   | 0.07  | 0.9   | 0.5   | 1.3   | 0.39  | -0.11 |
| <b>LLS</b>                 | Age (yrs)                | 872  | 60.0  | 6.60  | 60.0  | 33.6  | 80.3  | 0.03  | -0.21 | 1049 | 58.6  | 6.60  | 58.5  | 30.2  | 76.1  | 0.07  | -0.10 |
|                            | BMI (kg/m <sup>2</sup> ) | 869  | 25.7  | 2.91  | 25.4  | 18.1  | 35.9  | 1.00  | -0.04 | 1034 | 24.9  | 3.50  | 24.5  | 16.3  | 35.8  | 1.00  | -0.12 |
|                            | Weight (kg)              | 864  | 82.1  | 10.60 | 82.0  | 49.0  | 113.0 | 0.82  | 0.51  | 1045 | 69.6  | 10.90 | 68.0  | 45.0  | 113.0 | 0.89  | 0.33  |



|                       |                          |      |       |       |       |       |       |       |       |      |       |       |       |       |       |       |       |
|-----------------------|--------------------------|------|-------|-------|-------|-------|-------|-------|-------|------|-------|-------|-------|-------|-------|-------|-------|
|                       | Height (m)               | 864  | 178.8 | 6.60  | 178.0 | 155.0 | 201.0 | -0.07 | 1.00  | 1045 | 166.7 | 6.00  | 167.0 | 143.0 | 186.0 | -0.14 | 1.00  |
|                       | WC (cm)                  | 317  | 102.0 | 8.50  | 102.0 | 77.3  | 130.0 | 0.82  | 0.17  | 314  | 95.3  | 10.30 | 95.0  | 69.0  | 126.0 | 0.78  | 0.12  |
|                       | Hip (cm)                 | 318  | 105.4 | 6.10  | 105.0 | 87.5  | 128.0 | 0.69  | 0.30  | 308  | 104.0 | 7.00  | 104.0 | 82.5  | 126.0 | 0.81  | 0.14  |
|                       | WHR (cm/cm)              | 315  | 1.0   | 0.06  | 1.0   | 0.8   | 1.1   | 0.48  | -0.05 | 315  | 0.9   | 0.06  | 0.9   | 0.7   | 1.1   | 0.23  | 0.10  |
| <b>LOLIPOP_EW610</b>  | Age (yrs)                | 678  | 56.1  | 9.80  | 56.4  | 35.1  | 74.9  | 0.06  | -0.23 | 249  | 55.7  | 9.70  | 56.6  | 35.3  | 75.0  | 0.07  | -0.23 |
|                       | BMI (kg/m <sup>2</sup> ) | 678  | 27.8  | 4.40  | 27.3  | 18.0  | 46.4  | 1.00  | -0.05 | 249  | 26.6  | 5.10  | 25.4  | 17.7  | 47.9  | 1.00  | -0.14 |
|                       | Weight (kg)              | 678  | 85.6  | 15.00 | 83.5  | 46.0  | 150.4 | 0.89  | 0.40  | 249  | 70.6  | 13.80 | 68.2  | 43.4  | 118.1 | 0.91  | 0.28  |
|                       | Height (m)               | 678  | 175.4 | 6.90  | 175.5 | 150.0 | 196.0 | -0.05 | 1.00  | 249  | 162.8 | 6.60  | 163.0 | 146.0 | 187.5 | -0.14 | 1.00  |
|                       | WC (cm)                  | 677  | 98.4  | 11.60 | 97.3  | 72.0  | 146.0 | 0.90  | 0.12  | 248  | 88.3  | 13.60 | 87.0  | 62.0  | 134.0 | 0.85  | -0.03 |
|                       | Hip (cm)                 | 677  | 103.8 | 8.10  | 103.0 | 85.0  | 142.0 | 0.84  | 0.24  | 248  | 102.1 | 9.90  | 101.0 | 83.0  | 134.0 | 0.86  | 0.15  |
|                       | WHR (cm/cm)              | 677  | 0.9   | 0.06  | 0.9   | 0.8   | 1.2   | 0.62  | -0.06 | 248  | 0.9   | 0.10  | 0.8   | 0.7   | 1.2   | 0.46  | -0.18 |
| <b>LOLIPOP_EWA</b>    | Age (yrs)                | 513  | 54.4  | 10.10 | 55.5  | 22.7  | 75.0  | 0.05  | -0.30 | NA   | NA    | NA    | NA    | NA    | NA    | NA    | NA    |
|                       | BMI (kg/m <sup>2</sup> ) | 513  | 28.3  | 4.60  | 27.9  | 16.9  | 51.5  | 1.00  | -0.02 | NA   | NA    | NA    | NA    | NA    | NA    | NA    | NA    |
|                       | Weight (kg)              | 513  | 86.2  | 15.50 | 84.5  | 44.8  | 172.0 | 0.89  | 0.43  | NA   | NA    | NA    | NA    | NA    | NA    | NA    | NA    |
|                       | Height (m)               | 513  | 174.5 | 7.08  | 174.0 | 153.5 | 197.2 | -0.02 | 1.00  | NA   | NA    | NA    | NA    | NA    | NA    | NA    | NA    |
|                       | WC (cm)                  | 511  | 99.6  | 12.12 | 99.0  | 40.0  | 156.0 | 0.88  | 0.11  | NA   | NA    | NA    | NA    | NA    | NA    | NA    | NA    |
|                       | Hip (cm)                 | 511  | 104.0 | 8.60  | 104.0 | 39.0  | 153.0 | 0.75  | 0.23  | NA   | NA    | NA    | NA    | NA    | NA    | NA    | NA    |
|                       | WHR (cm/cm)              | 511  | 1.0   | 0.07  | 1.0   | 0.7   | 1.2   | 0.61  | -0.08 | NA   | NA    | NA    | NA    | NA    | NA    | NA    | NA    |
| <b>LOLIPOP_EWP</b>    | Age (yrs)                | 651  | 55.7  | 9.10  | 58.4  | 32.4  | 67.3  | -0.02 | -0.18 | NA   | NA    | NA    | NA    | NA    | NA    | NA    | NA    |
|                       | BMI (kg/m <sup>2</sup> ) | 651  | 28.6  | 5.30  | 27.9  | 16.5  | 58.3  | 1.00  | 0.00  | NA   | NA    | NA    | NA    | NA    | NA    | NA    | NA    |
|                       | Weight (kg)              | 651  | 87.4  | 17.30 | 85.3  | 45.8  | 152.4 | 0.92  | 0.39  | NA   | NA    | NA    | NA    | NA    | NA    | NA    | NA    |
|                       | Height (m)               | 651  | 174.5 | 6.81  | 175.0 | 154.0 | 201.4 | 0.00  | 1.00  | NA   | NA    | NA    | NA    | NA    | NA    | NA    | NA    |
|                       | WC (cm)                  | 650  | 100.9 | 13.60 | 63.0  | 100.0 | 152.0 | 0.92  | 0.17  | NA   | NA    | NA    | NA    | NA    | NA    | NA    | NA    |
|                       | Hip (cm)                 | 650  | 104.9 | 9.00  | 81.0  | 104.0 | 152.0 | 0.80  | 0.27  | NA   | NA    | NA    | NA    | NA    | NA    | NA    | NA    |
|                       | WHR (cm/cm)              | 650  | 1.0   | 0.07  | 0.6   | 1.0   | 1.2   | 0.60  | 0.01  | NA   | NA    | NA    | NA    | NA    | NA    | NA    | NA    |
| <b>NELSON</b>         | Age (yrs)                | 2668 | 59.9  | 5.51  | 59.0  | 50.0  | 79.0  | 0.01  | -0.18 | NA   | NA    | NA    | NA    | NA    | NA    | NA    | NA    |
|                       | BMI (kg/m <sup>2</sup> ) | 1135 | 27.1  | 3.64  | 26.8  | 15.3  | 42.4  | 1.00  | 0.00  | NA   | NA    | NA    | NA    | NA    | NA    | NA    | NA    |
|                       | Weight (kg)              | 1135 | 86.1  | 13.11 | 85.0  | 50.0  | 147.0 | 0.86  | 0.51  | NA   | NA    | NA    | NA    | NA    | NA    | NA    | NA    |
|                       | Height (m)               | 2668 | 178.8 | 6.25  | 179.0 | 157.0 | 201.0 | 0.00  | 1.00  | NA   | NA    | NA    | NA    | NA    | NA    | NA    | NA    |
| <b>PLCO2 controls</b> | Age (yrs)                | 649  | 63.6  | 5.20  | 64.0  | 55.0  | 74.0  | -0.16 | -0.08 | 544  | 63.6  | 5.20  | 64.0  | 55.0  | 74.0  | -0.06 | -0.07 |
|                       | BMI (kg/m <sup>2</sup> ) | 645  | 27.0  | 3.90  | 26.5  | 17.2  | 40.5  | 1.00  | 0.00  | 544  | 26.4  | 5.00  | 25.7  | 16.7  | 50.3  | 1.00  | -0.08 |
|                       | Weight (kg)              | 645  | 86.6  | 14.00 | 83.9  | 52.2  | 145.1 | 0.89  | 0.45  | 544  | 70.3  | 14.20 | 68.0  | 41.3  | 149.7 | 0.92  | 0.31  |
|                       | Height (m)               | 649  | 1.8   | 0.07  | 1.8   | 1.6   | 2.0   | 0.00  | 1.00  | 544  | 1.6   | 0.06  | 1.6   | 1.5   | 1.9   | -0.08 | 1.00  |
|                       | WC (cm)                  | NA   | NA    | NA    | NA    | NA    | NA    | NA    | NA    | NA   | NA    | NA    | NA    | NA    | NA    | NA    | NA    |
|                       | Hip (cm)                 | NA   | NA    | NA    | NA    | NA    | NA    | NA    | NA    | NA   | NA    | NA    | NA    | NA    | NA    | NA    | NA    |
|                       | WHR (cm/cm)              | NA   | NA    | NA    | NA    | NA    | NA    | NA    | NA    | NA   | NA    | NA    | NA    | NA    | NA    | NA    | NA    |
| <b>PLCO2 cases</b>    | Age (yrs)                | 2042 | 64.2  | 5.10  | 64.0  | 55.0  | 74.0  | -0.08 | -0.08 | 934  | 64.0  | 5.30  | 64.0  | 55.0  | 74.0  | -0.02 | -0.11 |
|                       | BMI (kg/m <sup>2</sup> ) | 2040 | 27.5  | 4.20  | 26.9  | 15.9  | 50.2  | 1.00  | -0.02 | 933  | 26.7  | 5.10  | 25.9  | 16.5  | 52.2  | 1.00  | -0.07 |
|                       | Weight (kg)              | 2040 | 87.6  | 14.80 | 85.3  | 52.2  | 176.9 | 0.90  | 0.42  | 933  | 71.0  | 14.50 | 68.0  | 40.8  | 137.9 | 0.91  | 0.33  |
|                       | Height (m)               | 2042 | 1.8   | 0.07  | 1.8   | 1.6   | 2.1   | -0.02 | 1.00  | 934  | 1.6   | 0.06  | 1.6   | 1.2   | 1.9   | -0.07 | 1.00  |
|                       | WC (cm)                  | NA   | NA    | NA    | NA    | NA    | NA    | NA    | NA    | NA   | NA    | NA    | NA    | NA    | NA    | NA    | NA    |
|                       | Hip (cm)                 | NA   | NA    | NA    | NA    | NA    | NA    | NA    | NA    | NA   | NA    | NA    | NA    | NA    | NA    | NA    | NA    |
|                       | WHR (cm/cm)              | NA   | NA    | NA    | NA    | NA    | NA    | NA    | NA    | NA   | NA    | NA    | NA    | NA    | NA    | NA    | NA    |
| <b>PREVEND</b>        | Age (yrs)                | 1870 | 50.9  | 12.8  | 50.0  | 28.0  | 75.0  | 0.20  | -0.34 | 1752 | 48.2  | 12.0  | 47.0  | 28.0  | 75.0  | 0.29  | -0.37 |

|                           |                          |      |       |       |       |       |       |       |       |      |       |       |       |       |       |       |       |    |
|---------------------------|--------------------------|------|-------|-------|-------|-------|-------|-------|-------|------|-------|-------|-------|-------|-------|-------|-------|----|
|                           | BMI (kg/m <sup>2</sup> ) | 1870 | 26.4  | 3.7   | 26.0  | 17.2  | 44.7  | 1.00  | -0.18 | 1752 | 25.8  | 4.8   | 25.0  | 17.1  | 53.7  | 1.00  | -0.22 |    |
|                           | Weight (kg)              | 1870 | 85.1  | 12.5  | 84.0  | 49.0  | 146.0 | 0.85  | 0.36  | 1752 | 72.3  | 13.2  | 70.0  | 44.9  | 144.5 | 0.91  | 0.20  |    |
|                           | Height (m)               | 1870 | 179.5 | 7.0   | 179.0 | 157.5 | 207.0 | -0.18 | 1.00  | 1752 | 167.5 | 6.5   | 167.5 | 145.0 | 193.0 | -0.22 | 1.00  |    |
|                           | WC (cm)                  | 1868 | 94.5  | 11.2  | 94.0  | 31.0  | 141.5 | 0.84  | -0.02 | 1752 | 83.3  | 13.0  | 81.5  | 57.0  | 150.0 | 0.86  | -0.08 |    |
|                           | Hip (cm)                 | 1868 | 100.1 | 6.7   | 100.0 | 70.0  | 128.0 | 0.78  | 0.23  | 1752 | 101.0 | 10.4  | 100.0 | 68.0  | 170.0 | 0.86  | 0.02  |    |
|                           | WHR (cm/cm)              | 1868 | 0.94  | 0.07  | 0.94  | 0.27  | 1.36  | 0.59  | -0.23 | 1752 | 0.82  | 0.08  | 0.82  | 0.45  | 1.39  | 0.45  | -0.15 |    |
| <b>PROSPER/<br/>PHASE</b> | Age (yrs)                | 2524 | 75.0  | 3.27  | 74.5  | 70.2  | 83.3  | -0.05 | -0.11 | 2720 | 75.7  | 3.40  | 75.4  | 69.4  | 83.4  | -0.05 | -0.08 |    |
|                           | BMI (kg/m <sup>2</sup> ) | 2524 | 26.6  | 3.58  | 26.3  | 15.2  | 45.1  | 1.00  | -0.06 | 2720 | 27.1  | 4.70  | 26.7  | 15.6  | 50.1  | 1.00  | -0.08 |    |
|                           | Weight (kg)              | 2524 | 78.7  | 11.93 | 78.0  | 40.0  | 127.0 | 0.86  | 0.47  | 2719 | 68.3  | 12.70 | 67.0  | 35.5  | 138.0 | -0.89 | 0.38  |    |
|                           | Height (m)               | 2524 | 172.1 | 6.67  | 172.0 | 143.0 | 198.0 | -0.06 | 1.00  | 2718 | 158.8 | 6.60  | 159.0 | 135.0 | 180.0 | -0.08 | 1.00  |    |
| <b>PROCARDIS</b>          | Age (yrs)                | 5334 | 60.4  | 8.10  | 61.0  | 20.0  | 83.0  | -0.01 | -0.15 | 1948 | 62.0  | 7.60  | 63.0  | 30.0  | 86.0  | 0.01  | -0.19 |    |
|                           | BMI (kg/m <sup>2</sup> ) | 5332 | 28.0  | 4.10  | 27.5  | 17.0  | 55.4  | 1.00  | -0.05 | 1947 | 28.2  | 5.50  | 27.2  | 15.4  | 62.0  | 1.00  | -0.17 |    |
|                           | Weight (kg)              | 5327 | 84.5  | 13.40 | 83.0  | 46.0  | 174.0 | 0.85  | 0.39  | 1947 | 72.8  | 14.40 | 71.0  | 33.0  | 159.0 | 0.90  | 0.26  |    |
|                           | Height (cm)              | 5334 | 173.7 | 6.90  | 174.0 | 139.0 | 206.0 | -0.09 | 1.00  | 1948 | 160.9 | 6.90  | 161.0 | 130.0 | 185.0 | -0.17 | 1.00  |    |
|                           | WC (cm)                  | 687  | 99.8  | 10.00 | 99.0  | 71.0  | 141.0 | 0.86  | 0.10  | 360  | 88.9  | 12.20 | 88.0  | 64.0  | 137.0 | 0.86  | 0.09  |    |
|                           | Hip (cm)                 | 687  | 101.8 | 6.60  | 101.0 | 85.0  | 130.0 | 0.77  | 0.22  | 360  | 101.4 | 9.10  | 100.0 | 80.0  | 173.0 | 0.86  | 0.14  |    |
|                           | WHR (cm/cm)              | 687  | 1.0   | 0.06  | 1.0   | 0.8   | 1.2   | 0.55  | -0.06 | 360  | 0.9   | 0.08  | 0.9   | 0.7   | 1.2   | 0.42  | 0.00  |    |
|                           |                          |      |       |       |       |       |       |       |       |      |       |       |       |       |       |       |       |    |
| <b>QFS</b>                | Age (yrs)                | 370  | 42.5  | 16.32 | 44.5  | 18.3  | 88.7  | 0.19  | -0.42 | 490  | 42.9  | 16.92 | 44.2  | 18.1  | 93.5  | 0.09  | -0.44 |    |
|                           | BMI (kg/m <sup>2</sup> ) | 370  | 27.5  | 6.45  | 26.0  | 17.4  | 57.3  | 1.00  | -0.06 | 490  | 27.9  | 8.45  | 25.2  | 16.8  | 64.9  | 1.00  | -0.12 |    |
|                           | Weight (kg)              | 370  | 82.0  | 19.80 | 77.5  | 45.5  | 167.5 | 0.95  | 0.26  | 490  | 71.3  | 21.76 | 64.5  | 35.0  | 181.1 | 0.96  | 0.16  |    |
|                           | Height (m)               | 370  | 1.7   | 0.07  | 1.7   | 1.5   | 1.9   | -0.06 | 1.00  | 490  | 1.6   | 0.07  | 1.6   | 1.4   | 1.8   | -0.12 | 1.00  |    |
|                           | WC (cm)                  | 366  | 94.2  | 16.66 | 90.7  | 65.4  | 164.5 | 0.95  | 0.01  | 466  | 84.9  | 18.68 | 79.1  | 57.9  | 151.0 | 0.95  | -0.06 |    |
|                           | Hip (cm)                 | 363  | 100.9 | 11.41 | 98.1  | 78.6  | 169.5 | 0.94  | 0.15  | 465  | 105.7 | 16.83 | 101.0 | 79.4  | 200.0 | 0.95  | 0.02  |    |
|                           | WHR (cm/cm)              | 363  | 0.9   | 0.08  | 0.9   | 0.8   | 1.1   | 0.67  | -0.19 | 465  | 0.8   | 0.08  | 0.8   | 0.5   | 1.1   | 0.55  | -0.17 |    |
| <b>QIMR</b>               | Age (yrs)                | 1470 | 44.7  | 16.34 | 44.0  | 18.0  | 91.0  | 0.27  | -0.16 | 2157 | 44.0  | 15.31 | 42.0  | 18.0  | 90.0  | 0.30  | -0.19 |    |
|                           | BMI (kg/m <sup>2</sup> ) | 1470 | 26.0  | 3.93  | 25.6  | 14.8  | 60.9  | 1.00  | -0.13 | 2157 | 25.0  | 5.08  | 23.9  | 14.2  | 64.5  | 1.00  | -0.17 |    |
|                           | Weight (kg)              | 1470 | 82.2  | 13.17 | 81.0  | 47.0  | 180.0 | 0.87  | 0.36  | 2157 | 66.6  | 13.69 | 64.0  | 34.0  | 160.0 | 0.91  | 0.25  |    |
|                           | Height (m)               | 1470 | 1.8   | 0.07  | 1.8   | 1.5   | 2.0   | -0.13 | 1.00  | 2157 | 1.6   | 0.07  | 1.6   | 1.3   | 2.0   | -0.17 | 1.00  |    |
|                           | WC (cm)                  | NA   | NA    | NA    | NA    | NA    | NA    | NA    | NA    | NA   | NA    | NA    | NA    | NA    | NA    | NA    | NA    | NA |
|                           | Hip (cm)                 | NA   | NA    | NA    | NA    | NA    | NA    | NA    | NA    | NA   | NA    | NA    | NA    | NA    | NA    | NA    | NA    | NA |
|                           | WHR (cm/cm)              | NA   | NA    | NA    | NA    | NA    | NA    | NA    | NA    | NA   | NA    | NA    | NA    | NA    | NA    | NA    | NA    | NA |
| <b>RISC</b>               | Age (yrs)                | 453  | 43.3  | 8.60  | 43.0  | 30.0  | 60.0  | 0.06  | -0.12 | 578  | 44.5  | 8.20  | 44.0  | 30.0  | 61.0  | 0.18  | -0.16 |    |
|                           | BMI (kg/m <sup>2</sup> ) | 453  | 26.4  | 3.50  | 26.1  | 17.0  | 43.9  | 1.00  | -0.03 | 578  | 24.8  | 4.20  | 23.9  | 16.9  | 41.7  | 1.00  | -0.13 |    |
|                           | Weight (kg)              | 453  | 84.0  | 12.90 | 82.0  | 48.8  | 143.9 | 0.86  | 0.48  | 578  | 67.5  | 11.90 | 65.8  | 42.1  | 119.0 | 0.90  | 0.31  |    |
|                           | Height (m)               | 453  | 178.4 | 6.90  | 178.0 | 149.0 | 203.0 | -0.03 | 1.00  | 578  | 165.0 | 6.30  | 165.0 | 147.0 | 187.0 | -0.13 | 1.00  |    |
|                           | WC (cm)                  | 447  | 93.8  | 10.20 | 93.0  | 65.0  | 147.0 | 0.80  | 0.19  | 570  | 80.7  | 11.50 | 79.0  | 49.0  | 120.0 | 0.82  | 0.08  |    |
|                           | Hip (cm)                 | 447  | 101.7 | 8.40  | 101.0 | 62.0  | 140.0 | 0.65  | 0.32  | 570  | 99.6  | 9.70  | 99.0  | 57.0  | 135.0 | 0.80  | 0.13  |    |
|                           | WHR (cm/cm)              | 447  | 0.9   | 0.07  | 0.9   | 0.7   | 1.7   | 0.42  | -0.10 | 570  | 0.8   | 0.08  | 0.8   | 0.6   | 1.3   | 0.35  | -0.01 |    |
| <b>SHIP-TREND</b>         | Age (yrs)                | 432  | 50.1  | 14.25 | 50.0  | 22.0  | 80.0  | 0.28  | -0.36 | 554  | 50.1  | 13.26 | 51.0  | 20.0  | 81.0  | 0.25  | -0.41 |    |
|                           | BMI (kg/m <sup>2</sup> ) | 432  | 27.8  | 3.80  | 27.7  | 17.7  | 43.9  | 1.00  | -0.07 | 554  | 27.0  | 5.08  | 26.3  | 18.5  | 53.6  | 1.00  | -0.19 |    |
|                           | Weight (kg)              | 432  | 86.9  | 13.05 | 85.5  | 53.3  | 129.8 | 0.87  | 0.43  | 554  | 72.7  | 13.73 | 71.2  | 45.5  | 136.3 | 0.91  | 0.23  |    |
|                           | Height (m)               | 432  | 1.8   | 0.07  | 1.8   | 1.6   | 2.0   | -0.07 | 1.00  | 554  | 1.6   | 0.06  | 1.7   | 1.4   | 1.8   | -0.19 | 1.00  |    |
|                           | WC (cm)                  | 432  | 94.4  | 11.20 | 94.0  | 66.4  | 138.8 | 0.88  | 0.06  | 554  | 83.1  | 11.98 | 81.5  | 54.5  | 122.8 | 0.90  | -0.07 |    |
|                           | Hip (cm)                 | 432  | 101.2 | 7.41  | 101.0 | 80.5  | 135.0 | 0.79  | 0.27  | 554  | 101.4 | 11.02 | 100.0 | 72.5  | 149.5 | 0.87  | 0.06  |    |

|                 |                          |      |       |       |       |       |       |       |       |      |       |       |       |       |       |       |       |
|-----------------|--------------------------|------|-------|-------|-------|-------|-------|-------|-------|------|-------|-------|-------|-------|-------|-------|-------|
|                 | WHR (cm/cm)              | 432  | 0.9   | 0.07  | 0.9   | 0.7   | 1.1   | 0.64  | -0.17 | 554  | 0.8   | 0.07  | 0.8   | 0.6   | 1.3   | 0.43  | -0.20 |
| <b>TRAILS</b>   | Age (yrs)                | 539  | 19.2  | 0.54  | 19.2  | 18.2  | 20.7  | 0.06  | -0.09 | 603  | 19.1  | 0.57  | 19.1  | 18.2  | 20.8  | 0.07  | -0.08 |
|                 | BMI (kg/m <sup>2</sup> ) | 539  | 22.6  | 3.80  | 21.9  | 15.6  | 43.2  | 1.00  | -0.03 | 602  | 23.0  | 3.71  | 22.4  | 15.9  | 45.6  | 1.00  | -0.16 |
|                 | Weight (kg)              | 539  | 76.3  | 13.99 | 73.5  | 48.4  | 138.0 | 0.90  | 0.40  | 602  | 66.5  | 10.94 | 65.5  | 42.5  | 125.0 | 0.89  | 0.31  |
|                 | Height (m)               | 539  | 183.6 | 7.28  | 183.5 | 165.0 | 206.0 | -0.03 | 1.00  | 603  | 170.1 | 6.56  | 170.5 | 141.5 | 191.5 | -0.16 | 1.00  |
|                 | WC (cm)                  | 537  | 81.8  | 9.81  | 79.5  | 64.5  | 130.8 | 0.87  | 0.20  | 602  | 75.3  | 8.76  | 73.6  | 46.0  | 130.0 | 0.86  | 0.05  |
|                 | Hip (cm)                 | 537  | 99.4  | 8.39  | 98.0  | 75.5  | 138.5 | 0.82  | 0.31  | 602  | 99.9  | 8.49  | 99.3  | 51.0  | 133.8 | 0.79  | 0.16  |
|                 | WHR (cm/cm)              | 537  | 0.8   | 0.05  | 0.8   | 0.7   | 1.1   | 0.49  | -0.03 | 602  | 0.8   | 0.05  | 0.7   | 0.6   | 1.0   | 0.41  | -0.10 |
| <b>TWINGENE</b> | Age (yrs)                | 4432 | 65.6  | 8.04  | 65.2  | 47.6  | 93.3  | -0.05 | -0.29 | 4948 | 64.7  | 8.22  | 64.3  | 47.4  | 93.9  | 0.04  | -0.32 |
|                 | BMI (kg/m <sup>2</sup> ) | 4349 | 26.3  | 3.54  | 25.9  | 15.4  | 57.8  | 1.00  | -0.07 | 4827 | 25.8  | 4.31  | 25.1  | 15.0  | 67.0  | 1.00  | -0.13 |
|                 | Weight (kg)              | 4349 | 81.9  | 12.22 | 80.5  | 50.0  | 179.1 | 0.86  | 0.44  | 4827 | 68.8  | 11.96 | 67.1  | 37.6  | 171.5 | 0.90  | 0.31  |
|                 | Height (m)               | 4432 | 1.8   | 0.07  | 1.8   | 1.4   | 2.1   | -0.07 | 1.00  | 4948 | 1.6   | 0.06  | 1.6   | 1.4   | 1.9   | -0.13 | 1.00  |
|                 | WC (cm)                  | 4414 | 97.2  | 10.25 | 97.0  | 52.5  | 193.0 | 0.82  | 0.14  | 4929 | 87.0  | 11.58 | 86.0  | 40.0  | 199.0 | 0.83  | 0.06  |
|                 | Hip (cm)                 | 4399 | 103.2 | 7.99  | 103.0 | 41.0  | 197.0 | 0.64  | 0.25  | 4922 | 103.4 | 9.39  | 102.0 | 38.0  | 172.0 | 0.83  | 0.12  |
|                 | WHR (cm/cm)              | 4396 | 0.9   | 0.09  | 0.9   | 0.5   | 2.6   | 0.37  | -0.05 | 4917 | 0.8   | 0.08  | 0.8   | 0.5   | 1.9   | 0.37  | -0.04 |
| <b>TwinsUK</b>  | Age (yrs)                | NA   | NA    | NA    | NA    | NA    | NA    | NA    | NA    | 3003 | 47.2  | 12.81 | 48.9  | 16.1  | 79.0  | 0.18  | -0.21 |
|                 | BMI (kg/m <sup>2</sup> ) | NA   | NA    | NA    | NA    | NA    | NA    | NA    | NA    | 3003 | 25.2  | 4.71  | 24.3  | 13.2  | 52.4  | 1.00  | -0.14 |
|                 | Weight (kg)              | NA   | NA    | NA    | NA    | NA    | NA    | NA    | NA    | 3003 | 66.3  | 12.63 | 64.1  | 35.1  | 140.9 | 0.91  | 0.26  |
|                 | Height (m)               | NA   | NA    | NA    | NA    | NA    | NA    | NA    | NA    | 3003 | 1.6   | 0.06  | 1.6   | 1.4   | 1.8   | -0.14 | 1.00  |
|                 | WC (cm)                  | NA   | NA    | NA    | NA    | NA    | NA    | NA    | NA    | 2201 | 79.1  | 10.54 | 77.0  | 53.0  | 134.0 | 0.85  | 0.04  |
|                 | Hip (cm)                 | NA   | NA    | NA    | NA    | NA    | NA    | NA    | NA    | 2200 | 101.5 | 9.86  | 100.0 | 69.0  | 168.0 | 0.87  | 0.12  |
|                 | WHR (cm/cm)              | NA   | NA    | NA    | NA    | NA    | NA    | NA    | NA    | 2200 | 0.8   | 0.06  | 0.8   | 0.6   | 1.4   | 0.35  | -0.07 |

**Supplementary Table 20.** Study design, number of individuals and sample quality control for MetaboChip study cohorts.

| Study                       |                                                                          | Study design                               | Total sample Size (N) | Sample QC                            |                                                                                                                                | Samples in analyses (N) | Anthropometric assessment method | References                                                                                                                                                                                                                                                                                                                                                                                                                                                                                                                                                                                                                                                                                           |
|-----------------------------|--------------------------------------------------------------------------|--------------------------------------------|-----------------------|--------------------------------------|--------------------------------------------------------------------------------------------------------------------------------|-------------------------|----------------------------------|------------------------------------------------------------------------------------------------------------------------------------------------------------------------------------------------------------------------------------------------------------------------------------------------------------------------------------------------------------------------------------------------------------------------------------------------------------------------------------------------------------------------------------------------------------------------------------------------------------------------------------------------------------------------------------------------------|
| Short name                  | Full name                                                                |                                            |                       | Call rate*                           | other exclusions                                                                                                               |                         |                                  |                                                                                                                                                                                                                                                                                                                                                                                                                                                                                                                                                                                                                                                                                                      |
| <b>ADVANCE-CAD controls</b> | Atherosclerotic Disease, Vascular Function, & Genetic Epidemiology study | Population-based case control study of CAD | 705                   | ≥95%                                 | 1) missing body weight and/or height data<br>2) sex discrepancies                                                              | 663                     | measured                         | 1) Go, A.S. et al. Statin and beta-blocker therapy and the initial presentation of coronary heart disease. <i>Ann Intern Med</i> 144, 229-38 (2006).<br>2) Taylor-Piliae, R.E. et al. Validation of a new brief physical activity survey among men and women aged 60-69 years. <i>Am J Epidemiol</i> 164, 598-606 (2006).<br>3) Iribarren, C. et al. Metabolic syndrome and early-onset coronary artery disease: is the whole greater than its parts? <i>J Am Coll Cardiol</i> 48, 1800-7 (2006).<br>4) Assimes, T.L. et al. Susceptibility locus for clinical and subclinical coronary artery disease at chromosome 9p21 in the multi-ethnic ADVANCE study. <i>Hum Mol Genet</i> 17, 2320-8 (2008). |
| <b>ADVANCE-CAD cases</b>    | Atherosclerotic Disease, Vascular Function, & Genetic Epidemiology study | Population-based case control study of CAD | 974                   | ≥95%                                 | 1) missing body weight and/or height data<br>2) sex discrepancies                                                              | 895                     | measured                         | 1) Go, A.S. et al. Statin and beta-blocker therapy and the initial presentation of coronary heart disease. <i>Ann Intern Med</i> 144, 229-38 (2006).<br>2) Taylor-Piliae, R.E. et al. Validation of a new brief physical activity survey among men and women aged 60-69 years. <i>Am J Epidemiol</i> 164, 598-606 (2006).<br>3) Iribarren, C. et al. Metabolic syndrome and early-onset coronary artery disease: is the whole greater than its parts? <i>J Am Coll Cardiol</i> 48, 1800-7 (2006).<br>4) Assimes, T.L. et al. Susceptibility locus for clinical and subclinical coronary artery disease at chromosome 9p21 in the multi-ethnic ADVANCE study. <i>Hum Mol Genet</i> 17, 2320-8 (2008). |
| <b>AMC-PAS</b>              | Academic Medical Centre Amsterdam Premature Atherosclerosis Study        | CAD cases                                  | 706                   | 0.97                                 | 1) heterozygosity<br>2) ethnic outliers<br>3) duplicates<br>4) missing phenotypes<br>5) call rate < 0.95                       | 490                     | measured                         | Coronary Artery Disease, C. et al. Large scale association analysis of novel genetic loci for coronary artery disease. <i>Arterioscler Thromb Vasc Biol</i> 29, 774-80 (2009).                                                                                                                                                                                                                                                                                                                                                                                                                                                                                                                       |
| <b>B1958C</b>               | 1958 British Birth Cohort                                                | Population-based                           | 2359                  | MAF ≥5%: ≥95%<br>1% ≤MAF <5%<br>≥99% | 1) MAF ≥1%; genotype clustering<br>2) call rate<br>3) HWE<br>4) MI of alleles<br>5) concordance rate<br>6) correct SNP mapping | 2211                    | measured                         |                                                                                                                                                                                                                                                                                                                                                                                                                                                                                                                                                                                                                                                                                                      |
| <b>BHS</b>                  | Busselton Health Study                                                   | Population-based                           | 270                   | ≥99%                                 | 1) Relatedness<br>2) Missing height measurement                                                                                | 263                     | measured                         | James, A.L. et al. Decline in lung function in the Busselton Health Study: the effects of asthma and cigarette smoking. <i>Am J Respir Crit Care Med</i> 171, 109-14 (2005).                                                                                                                                                                                                                                                                                                                                                                                                                                                                                                                         |
| <b>CARDIOGENICS</b>         | CARDIOGENICS                                                             | CAD case-control                           | 806                   | 0.98                                 | 1) heterozygosity<br>2) ethnic outliers<br>3) duplicates<br>4) missing phenotypes<br>5) call rate < 0.95                       | 754                     | measured                         | Samani, N.J. et al. Genomewide association analysis of coronary artery disease. <i>N Engl J Med</i> 357, 443-53 (2007).                                                                                                                                                                                                                                                                                                                                                                                                                                                                                                                                                                              |

|                     |                                                                                 |                           |      |                                      |                                                                                                                                    |      |          |                                                                                                                                                                                                                                                                                                                                                                                                                           |
|---------------------|---------------------------------------------------------------------------------|---------------------------|------|--------------------------------------|------------------------------------------------------------------------------------------------------------------------------------|------|----------|---------------------------------------------------------------------------------------------------------------------------------------------------------------------------------------------------------------------------------------------------------------------------------------------------------------------------------------------------------------------------------------------------------------------------|
| <b>D2D 2007</b>     | FIN-D2D study, 2007 cohort                                                      | Population-based          | 2720 | ≥98.15%                              | 1) Missing BMI, age, age<18.<br>2) Gender discrepancy or anomaly<br>3) Unexplained duplicate sample                                | 2688 | measured | Kotronen, A. et al. Non-alcoholic and alcoholic fatty liver disease - two diseases of affluence associated with the metabolic syndrome and type 2 diabetes: the FIN-D2D survey. BMC Public Health 10, 237 (2010).                                                                                                                                                                                                         |
| <b>DESIR</b>        | Data from an Epidemiological Study on the Insulin Resistance syndrome           | Population-based          | 4993 | ≥90%                                 | 1) Missing data                                                                                                                    | 3925 | measured | Balkau, B. [An epidemiologic survey from a network of French Health Examination Centres, (D.E.S.I.R.): epidemiologic data on the insulin resistance syndrome]. Rev Epidemiol Sante Publique 44, 373-5 (1996).                                                                                                                                                                                                             |
| <b>DIAGEN</b>       | The DIAbetes GENetics Study                                                     | Clinical prevention study | 1535 | ≥98.15%                              | 1) Missing BMI, age, age<18.<br>2) Gender discrepancy or anomaly<br>3) Unexplained duplicate sample                                | 1462 | measured | Schwarz, P.E., et al. Hypoadiponectinemia is associated with progression toward type 2 diabetes and genetic variation in the ADIPOQ gene promoter. Diabetes Care 29, 1645-50 (2006).                                                                                                                                                                                                                                      |
| <b>DILGOM</b>       | Dietary, life style, and genetic determinants of obesity and metabolic syndrome | Population-based          | 3997 | ≥95%                                 | 1) heterozygosity <23.9% or >27.6%;<br>2) ethnic outliers;<br>3) related individuals and duplicates.                               | 3938 | measured | 1) Konttinen, H. et al. Emotional eating, depressive symptoms and self-reported food consumption. A population-based study. Appetite 54, 473-9 (2010).<br>2) Inouye, M. et al. An immune response network associated with blood lipid levels. PLoS Genet 6, e1001113 (2010).<br>3) Peltonen, M. et al. The National FINRISK 2007 Study. Helsinki: Publications of the National Public Health Institute, B 34/2008 (2008). |
| <b>DPS</b>          | Diabetes Prevention Study                                                       | Population-based          | 522  | ≥98.15%                              | 1) Missing BMI, age, age<18.<br>2) Gender discrepancy or anomaly<br>3) Unexplained duplicate sample                                | 472  | measured | Tuomilehto, J. et al. Prevention of type 2 diabetes mellitus by changes in lifestyle among subjects with impaired glucose tolerance. N Engl J Med 344, 1343-50 (2001).                                                                                                                                                                                                                                                    |
| <b>DR'S EXTRA</b>   | DR'S EXTRA                                                                      | Population-based          | 1408 | ≥98.15%                              | 1) Missing BMI, age, age<18.<br>2) Gender discrepancy or anomaly<br>3) Unexplained duplicate sample                                | 1295 | measured | Kouki, R. et al. Diet, fitness and metabolic syndrome--the DR's EXTRA study. Nutr Metab Cardiovasc Dis 22, 553-60 (2012).                                                                                                                                                                                                                                                                                                 |
| <b>DUNDEE cases</b> | DUNDEE cases                                                                    | Population-based          | 3582 | MAF ≥5%: ≥95%<br>≥1% MAF<5%:<br>≥99% | 1) MAF≥1%<br>2) genotype clustering<br>3) call rate<br>4) HWE<br>5) MI of alleles<br>6) concordance rate<br>7) correct SNP mapping | 3582 | measured |                                                                                                                                                                                                                                                                                                                                                                                                                           |

|                         |                                                                                     |                  |              |                                                                         |                                                                                                                                            |              |          |                                                                                                                                                                                                                                                                                                                                |
|-------------------------|-------------------------------------------------------------------------------------|------------------|--------------|-------------------------------------------------------------------------|--------------------------------------------------------------------------------------------------------------------------------------------|--------------|----------|--------------------------------------------------------------------------------------------------------------------------------------------------------------------------------------------------------------------------------------------------------------------------------------------------------------------------------|
| <b>DUNDEE controls</b>  | DUNDEE controls                                                                     | Population-based | 3962         | MAF $\geq 5\%$ : $\geq 95\%$<br>$\geq 1\%$ MAF $< 5\%$ :<br>$\geq 99\%$ | 1) MAF $\geq 1\%$<br>2) genotype clustering<br>3) call rate<br>4) HWE<br>5) MI of alleles<br>6) concordance rate<br>7) correct SNP mapping | 3709         | measured |                                                                                                                                                                                                                                                                                                                                |
| <b>EAS</b>              | Edinburgh Artery Study                                                              | Population based | 733          | $\geq 90\%$                                                             | 1) Missing body weight and height.<br>2) Heterozygosity                                                                                    | 733          | measured | Fowkes, F.G. et al. Edinburgh Artery Study: prevalence of asymptomatic and symptomatic peripheral arterial disease in the general population. <i>Int J Epidemiol</i> 20, 384-92 (1991).                                                                                                                                        |
| <b>EGCUT-CAD</b>        | Estonian Genome Center of University of Tartu - Cardiovascular Disease cases        | Case-Controls    | 700          | $\geq 84.6\%$                                                           | 1) Missing body weight and height.<br>2) Cryptic relatedness                                                                               | 700          | measured | Nelis, M. et al. Genetic structure of Europeans: a view from the North-East. <i>PLoS One</i> 4, e5472 (2009).                                                                                                                                                                                                                  |
| <b>EGCUT-CONTROLS</b>   | Estonian Genome Center of University of Tartu - Controls                            | Case-Controls    | 942          | $\geq 84.6\%$                                                           | 1) Missing body weight and height.<br>2) Cryptic relatedness                                                                               | 942          | measured | Nelis, M. et al. Genetic structure of Europeans: a view from the North-East. <i>PLoS One</i> 4, e5472 (2009).                                                                                                                                                                                                                  |
| <b>EGCUT-T2D</b>        | Estonian Genome Center of University of Tartu - Type 2 Diabetes cases               | Case-Controls    | 968          | $\geq 84.6\%$                                                           | 1) Missing body weight and height.<br>2) Cryptic relatedness                                                                               | 968          | measured | Nelis, M. et al. Genetic structure of Europeans: a view from the North-East. <i>PLoS One</i> 4, e5472 (2009).                                                                                                                                                                                                                  |
| <b>Ely Study</b>        | MRC Ely Study                                                                       | Population-based | 1625         | $\geq 95\%$                                                             | 1) missing phenotype data<br>2) gender check;<br>3) duplicates check;                                                                      | 1600         | measured | Forouhi, N.G. et al. Incidence of Type 2 diabetes in England and its association with baseline impaired fasting glucose: the Ely study 1990-2000. <i>Diabet Med</i> 24, 200-7 (2007).                                                                                                                                          |
| <b>EMIL</b>             | Echinococcus Multilocularis and Internal Diseases in Leutkirch (EMIL) study         | Population based | N/A          | $\geq 95\%$                                                             | 1) Missing phenotype<br>2) non-European ancestry                                                                                           | 1722         | measured | 1) Boehm, B.O. et al. Prevalence of the metabolic syndrome in southwest Germany. <i>Scand J Clin Lab Invest Suppl</i> 240, 122-8 (2005).<br>2) Haenle, M.M. et al. Overweight, physical activity, tobacco and alcohol consumption in a cross-sectional random sample of German adults. <i>BMC Public Health</i> 6, 233 (2006). |
| <b>EPIC-Norfolk T2D</b> | EPIC (European Prospective Investigation into Cancer) Norfolk T2D case-Cohort Study | Population-based | 978 - cohort | $\geq 95\%$                                                             | 1) Missing body weight and height, or case-control status.<br>2) Heterozygosity<br>3) gender check                                         | 963 - cohort | measured | 1) Day, N. et al. EPIC-Norfolk: study design and characteristics of the cohort. <i>European Prospective Investigation of Cancer. Br J Cancer</i> 80 Suppl 1, 95-103 (1999).<br>2) Loos, R.J. et al. Common variants near MC4R are associated with fat mass, weight and risk of obesity. <i>Nat Genet</i> 40, 768-75 (2008).    |
|                         |                                                                                     |                  | 735 - T2D    |                                                                         |                                                                                                                                            | 727 - T2D    |          |                                                                                                                                                                                                                                                                                                                                |
| <b>Fenland</b>          | The Fenland Study                                                                   | Population-based | 3251         | $\geq 95\%$                                                             | 1) missing phenotype data<br>2) gender check;<br>3) duplicates check;                                                                      | 3186         | measured | Willer, C.J. et al. Six new loci associated with body mass index highlight a neuronal influence on body weight regulation. <i>Nat Genet</i> 41, 25-34 (2009).                                                                                                                                                                  |
| <b>FUSION stage 2</b>   | FUSION stage 2                                                                      | case-control     | 2951         | $\geq 98.15\%$                                                          | 1) Missing BMI, age, age $< 18$ .<br>2) Gender discrepancy or anomaly<br>3) Unexplained duplicate sample                                   | 2929         | measured | Scott, L.J. et al. A genome-wide association study of type 2 diabetes in Finns detects multiple susceptibility variants. <i>Science</i> 316, 1341-5 (2007).                                                                                                                                                                    |

|                |                                                                                                                                               |                                                                                    |       |         |                                                                                                                                              |       |          |                                                                                                                                                                                                                                                                                                                                                                                                                                                                                                                                                                                                                 |
|----------------|-----------------------------------------------------------------------------------------------------------------------------------------------|------------------------------------------------------------------------------------|-------|---------|----------------------------------------------------------------------------------------------------------------------------------------------|-------|----------|-----------------------------------------------------------------------------------------------------------------------------------------------------------------------------------------------------------------------------------------------------------------------------------------------------------------------------------------------------------------------------------------------------------------------------------------------------------------------------------------------------------------------------------------------------------------------------------------------------------------|
| <b>GLACIER</b> | Gene x Lifestyle interactions And Complex traits Involved in Elevated disease Risk                                                            | Prospective cohort study                                                           | 6,311 | ≥95%    | 1) Missing phenotype<br>2) Duplicates<br>3) Call rate<br>4) Heterozygosity<br>5) Gender fails                                                | 6047  | measured | 1) Renstrom, F. et al. Genetic predisposition to long-term nondiabetic deteriorations in glucose homeostasis: Ten-year follow-up of the GLACIER study. <i>Diabetes</i> 60, 345-54 (2011).<br>2) Hallmans, G. et al. Cardiovascular disease and diabetes in the Northern Sweden Health and Disease Study Cohort - evaluation of risk factors and their interactions. <i>Scand J Public Health Suppl</i> 61, 18-24 (2003).<br>3) Renstrom, F. et al. Replication and extension of genome-wide association study results for obesity in 4923 adults from northern Sweden. <i>Hum Mol Genet</i> 18, 1489-96 (2009). |
| <b>HNR</b>     | Heinz Nixdorf Recall                                                                                                                          | Population-based                                                                   | 4570  | ≥97%    | 1) Missing BMI<br>2) heterozygosity<br>3) ethnic outlier<br>4) related individuals<br>5) duplicates                                          | 4500  | measured | 1) Stang, A. et al. Baseline recruitment and analyses of nonresponse of the Heinz Nixdorf Recall Study: identifiability of phone numbers as the major determinant of response. <i>Eur J Epidemiol</i> 20, 489-96 (2005).<br>2) Pechlivanis, S. et al. Coronary artery calcification and its relationship to validated genetic variants for diabetes mellitus assessed in the Heinz Nixdorf recall cohort. <i>Arterioscler Thromb Vasc Biol</i> 30, 1867-72 (2010).                                                                                                                                              |
| <b>HUNT 2</b>  | The Nord-Trøndelag Health Study 2                                                                                                             | Population-based, although T2D case-control samples selected for metabochip typing | 1567  | ≥98.15% | 1) Missing BMI, age, age<18, forms of diabetes other than T2D (cases)<br>2) Gender discrepancy or anomaly<br>3) Unexplained duplicate sample | 1334  | measured | Holmen J, Midthjell K, et al. The Nord-Trøndelag Health Study 1995-97 (HUNT 2): Objectives, contents, methods and participation. <i>Nor J Epidemiol</i> 13(1):19-32 (2003).                                                                                                                                                                                                                                                                                                                                                                                                                                     |
| <b>IMPROVE</b> | Carotid Intima Media Thickness [IMT] and IMT-Progression as Predictors of Vascular Events in a High Risk European Population                  | Population-based                                                                   | NA    | ≥95%    | 1) ambiguous sex<br>2) cryptic relatedness<br>3) non-european descent                                                                        | 3,425 | measured | Baldassarre, D. et al. Cross-sectional analysis of baseline data to identify the major determinants of carotid intima-media thickness in a European population: the IMPROVE study. <i>Eur Heart J</i> 31, 614-22 (2010).                                                                                                                                                                                                                                                                                                                                                                                        |
| <b>KORA S3</b> | Cooperative Health Research in the Region of Augsburg (third survey), KOoperative Gesundheitsforschung in der Region Augsburg (dritte Studie) | Population-based                                                                   | 3113  | none    | none                                                                                                                                         | 3,113 | measured | Wichmann, H.E., Gieger, C., Illig, T. & Group, M.K.S. KORA-gen--resource for population genetics, controls and a broad spectrum of disease phenotypes. <i>Gesundheitswesen</i> 67 Suppl 1, S26-30 (2005).                                                                                                                                                                                                                                                                                                                                                                                                       |
| <b>KORA S4</b> | Cooperative Health Research in the Region of Augsburg (forth survey), KOoperative Gesundheitsforschung in der Region Augsburg (vierte Studie) | Population-based                                                                   | 3028  | none    | none                                                                                                                                         | 3,028 | measured | Wichmann, H.E., Gieger, C., Illig, T. & Group, M.K.S. KORA-gen--resource for population genetics, controls and a broad spectrum of disease phenotypes. <i>Gesundheitswesen</i> 67 Suppl 1, S26-30 (2005).                                                                                                                                                                                                                                                                                                                                                                                                       |

|                         |                                                                 |                                                                                    |       |         |                                                                                                                                                       |       |          |                                                                                                                                                                                                                                                                                                                                                                                                                                                                                                                                       |
|-------------------------|-----------------------------------------------------------------|------------------------------------------------------------------------------------|-------|---------|-------------------------------------------------------------------------------------------------------------------------------------------------------|-------|----------|---------------------------------------------------------------------------------------------------------------------------------------------------------------------------------------------------------------------------------------------------------------------------------------------------------------------------------------------------------------------------------------------------------------------------------------------------------------------------------------------------------------------------------------|
| <b>Leipzig Adults</b>   | Leipzig adults                                                  | Population-based                                                                   | 1005  | ≥95%    | 1) ethnic outliers<br>2) gender discordance                                                                                                           | 1,005 | measured | Speliotes, E.K. et al. Association analyses of 249,796 individuals reveal 18 new loci associated with body mass index. <i>Nat Genet</i> 42, 937-48 (2010).                                                                                                                                                                                                                                                                                                                                                                            |
| <b>LURIC - Cases</b>    | Ludwigshafen Risk and Cardiovascular Health Study               | Case - Control                                                                     | 2583  | ≥95%    | 1) missing metabochip data<br>2) ambiguous sex<br>3) duplicates, 4) relatedness                                                                       | 2251  | measured | Winkelmann, B.R. et al. Rationale and design of the LURIC study--a resource for functional genomics, pharmacogenomics and long-term prognosis of cardiovascular disease. <i>Pharmacogenomics</i> 2, S1-73 (2001).                                                                                                                                                                                                                                                                                                                     |
| <b>LURIC - Controls</b> | Ludwigshafen Risk and Cardiovascular Health Study               | Case - Control                                                                     | 733   | ≥95%    | 1) missing metabochip data<br>2) ambiguous sex<br>3) duplicates, 4) relatedness                                                                       | 645   | measured | Winkelmann, B.R. et al. Rationale and design of the LURIC study--a resource for functional genomics, pharmacogenomics and long-term prognosis of cardiovascular disease. <i>Pharmacogenomics</i> 2, S1-73 (2001).                                                                                                                                                                                                                                                                                                                     |
| <b>METSIM</b>           | Metabolic Syndrome In Men                                       | Population-based, although T2D case-control samples selected for metabochip typing | 2176  | ≥98.15% | 1) Missing BMI and age<br>2) age<18<br>3) Gender discrepancy or anomaly<br>4) Unexplained duplicate sample                                            | 2014  | measured | Stancakova, A. et al. Changes in insulin sensitivity and insulin release in relation to glycemia and glucose tolerance in 6,414 Finnish men. <i>Diabetes</i> 58, 1212-21 (2009).                                                                                                                                                                                                                                                                                                                                                      |
| <b>MORGAM Cases</b>     | MOnica Risk, Genetics, Archiving and Monograph                  | CVD cases from population-based follow-up cohorts.                                 | ~2150 | ≥95%    | 1) heterozygosity <18.1% or >20.7%;<br>2) >10.0% discordance with Sequenom genotypes<br>3) ethnic outliers;<br>4) related individuals and duplicates. | 2052  | measured | 1) Evans, A. et al. MORGAM (an international pooling of cardiovascular cohorts). <i>Int J Epidemiol</i> 34, 21-7 (2005).<br>2) Tunstall-Pedoe H, editor. Prepared by Tunstall-Pedoe H, Kuulasmaa K, Tolonen H, Davidson M, Mendis S with 64 other contributors for The WHO MONICA Project. MONICA Monograph and Multimedia Sourcebook. Geneva: World Health Organization; 2003. ISBN 92 4 156223 4. Also available from <a href="http://www.ktl.fi/monica/public/monograph.html">http://www.ktl.fi/monica/public/monograph.html</a> . |
| <b>MORGAM Controls</b>  | MOnica Risk, Genetics, Archiving and Monograph                  | Population-based follow-up cohorts.                                                | ~2650 | ≥95%    | 1) heterozygosity <18.1% or >20.7%;<br>2) >10.0% discordance with Sequenom genotypes<br>3) ethnic outliers;<br>4) related individuals and duplicates. | 2473  | measured | 1) Evans, A. et al. MORGAM (an international pooling of cardiovascular cohorts). <i>Int J Epidemiol</i> 34, 21-7 (2005).<br>2) Tunstall-Pedoe H, editor. Prepared by Tunstall-Pedoe H, Kuulasmaa K, Tolonen H, Davidson M, Mendis S with 64 other contributors for The WHO MONICA Project. MONICA Monograph and Multimedia Sourcebook. Geneva: World Health Organization; 2003. ISBN 92 4 156223 4. Also available from <a href="http://www.ktl.fi/monica/public/monograph.html">http://www.ktl.fi/monica/public/monograph.html</a> . |
| <b>NSHD</b>             | MRC National Survey of Health & Development                     | Birth cohort                                                                       | 5,362 | ≥95%    | 1) Missing body weight and height.<br>2) Heterozygosity<br>3) gender check                                                                            | 988   | measured | Wadsworth, M., Kuh, D., Richards, M. & Hardy, R. Cohort Profile: The 1946 National Birth Cohort (MRC National Survey of Health and Development). <i>Int J Epidemiol</i> 35, 49-54 (2006).                                                                                                                                                                                                                                                                                                                                             |
| <b>PIVUS</b>            | Prospective Investigation of the Vasculature in Uppsala Seniors | Population-based                                                                   | 999   | ≥90%    | 1) Related individuals and duplicates<br>2) Heterozygosity, (F-mean(F))/sd(Z) ≥ 5<br>3) Missing phenotypes used in analysis                           | 978   | measured | Lind, L., Fors, N., Hall, J., Marttala, K. & Stenborg, A. A comparison of three different methods to evaluate endothelium-dependent vasodilation in the elderly: the Prospective Investigation of the Vasculature in Uppsala Seniors (PIVUS) study. <i>Arterioscler Thromb Vasc Biol</i> 25, 2368-75 (2005).                                                                                                                                                                                                                          |
| <b>STR</b>              | Swedish Twin Registry                                           | Population-based                                                                   | 2702  | ≥90%    | 1) Heterozygosity, (F-mean(F))/sd(Z) ≥ 5<br>2) Missing phenotypes used in analysis                                                                    | 2185  | measured | Lichtenstein, P. et al. The Swedish Twin Registry in the third millennium: an update. <i>Twin Res Hum Genet</i> 9, 875-82 (2006).                                                                                                                                                                                                                                                                                                                                                                                                     |



|                  |                                                                                              |                                                                                    |      |                                       |                                                                                                                                      |      |          |                                                                                                                                                                                                                                                                                                                                              |
|------------------|----------------------------------------------------------------------------------------------|------------------------------------------------------------------------------------|------|---------------------------------------|--------------------------------------------------------------------------------------------------------------------------------------|------|----------|----------------------------------------------------------------------------------------------------------------------------------------------------------------------------------------------------------------------------------------------------------------------------------------------------------------------------------------------|
| <b>THISEAS</b>   | The Hellenic study of Interactions between Snps and Eating in Atherosclerosis Susceptibility | CAD case-control                                                                   | 1887 | ≥97%                                  | 1) heterozygosity<br>2) ethnic outliers<br>3) duplicates<br>4) missing phenotypes<br>5) call rate< 0.95                              | 1413 | measured |                                                                                                                                                                                                                                                                                                                                              |
| <b>Tromsø</b>    | Tromsø 4                                                                                     | Population-based, although T2D case-control samples selected for metabochip typing | 1421 | ≥98.15%                               | 1) Missing BMI, age, age<18.<br>2) Gender discrepancy or anomaly<br>3) Unexplained duplicate sample                                  | 1418 | measured | Jacobsen, B.K., Eggen, A.E., Mathiesen, E.B., Wilsgaard, T. & Njolstad, I. Cohort profile: the Tromso Study. <i>Int J Epidemiol</i> 41, 961-7 (2012).                                                                                                                                                                                        |
| <b>ULSAM</b>     | Uppsala Longitudinal Study of Adult Men                                                      | Population-based                                                                   | 1221 | ≥90%                                  | 1) Related individuals and duplicates<br>2) Heterozygosity, (F-mean(F))/sd(Z) ≥ 5<br>3) Missing phenotypes used in analysis          | 1112 | measured | Ingelsson, E., Sundstrom, J., Arnlov, J., Zethelius, B. & Lind, L. Insulin resistance and risk of congestive heart failure. <i>JAMA</i> 294, 334-41 (2005).                                                                                                                                                                                  |
| <b>WHITEHALL</b> | The Whitehall II study                                                                       | Cohort of London-based civil servants                                              | 3413 | ≥95%                                  | 1) missing phenotype data<br>2) gender check;<br>3) duplicates check;                                                                | 2234 | measured | 1) Marmot, M. & Brunner, E. Cohort Profile: the Whitehall II study. <i>Int J Epidemiol</i> 34, 251-6 (2005).<br>2) Jensen, A.C. et al. Associations of common genetic variants with age-related changes in fasting and postload glucose: evidence from 18 years of follow-up of the Whitehall II cohort. <i>Diabetes</i> 60, 1617-23 (2011). |
| <b>WTCCC-T2D</b> | Wellcome Trust Case Control Consortium - T2D non GWAS                                        | Population-based                                                                   | 1335 | MAF ≥5% : ≥95%<br>≥1% MAF<5%:<br>≥99% | 1) MAF ≥ 1%<br>2) call rate<br>3) HWE<br>4) MI of alleles<br>5) concordance rate<br>6) correct SNP mapping<br>7) genotype clustering | 1077 | measured | Wellcome Trust Case Control, C. Genome-wide association study of 14,000 cases of seven common diseases and 3,000 shared controls. <i>Nature</i> 447, 661-78 (2007).                                                                                                                                                                          |

\* Call rate to exclude individuals for whom genotyping success rate is less than a certain percentage (to exclude 'bad' samples/DNA)

**Supplementary Table 21.** Information on genotyping methods, quality control of SNPs, imputation, and statistical analysis for Metabochip study cohort

| Study                          | GENOTYPING                                        |                    |            |                   |                           | ASSOCIATION ANALYSIS  |                   |
|--------------------------------|---------------------------------------------------|--------------------|------------|-------------------|---------------------------|-----------------------|-------------------|
|                                | Genotype calling algorithm                        | Inclusion criteria |            |                   | SNPs that met QC criteria | SNPs in meta-analysis | Analyses software |
|                                |                                                   | MAF                | Call rate* | P for HWE         |                           |                       |                   |
| ADVANCE-CAD controls (males)   | GenCall                                           | >0%                | ALL        | >0.001            | 195,405                   | 195,405               | PLINK             |
| ADVANCE-CAD controls (females) | GenCall                                           | >0%                | ALL        | >0.001            | 195,679                   | 195,679               | PLINK             |
| ADVANCE-CAD cases (males)      | GenCall                                           | >0%                | ALL        | >0.001            | 195,050                   | 195,050               | PLINK             |
| ADVANCE-CAD cases (females)    | GenCall                                           | >0%                | ALL        | >0.001            | 195,827                   | 195,827               | PLINK             |
| AMC-PAS                        | GenoSNP                                           | ALL                | ≥98%       | >10 <sup>-4</sup> | 169,807                   | 169,807               | PLINK             |
| B1958C                         | GeneCall                                          | ≥1%                | ≥95%       | >10 <sup>-6</sup> | 180,655                   | 180,655               | SNPTEST           |
| BHS                            | GenomeStudio                                      | ALL                | ALL        | ALL               | 129,565                   | 129,565               | GenABEL           |
| CARDIOGENICS                   | GenoSNP                                           | ALL                | ≥98%       | >10 <sup>-5</sup> | 177,614                   | 177,614               | PLINK             |
| D2D 2007 cases                 | BeadStudio version 3.3.7,<br>GentraIn version 1.0 | >0%                | ≥98.15%    | ALL               | 138,569                   | 138,569               | EMMAX             |
| D2D 2007 controls              | BeadStudio version 3.3.7,<br>GentraIn version 1.0 | >0%                | ≥98.15%    | none              | 145,465                   | 145,465               | EMMAX             |
| DIAGEN cases                   | BeadStudio version 3.3.7,<br>GentraIn version 1.0 | >0%                | ≥98.15%    | none              | 137,937                   | 137,937               | EMMAX             |
| DIAGEN controls                | BeadStudio version 3.3.7,<br>GentraIn version 1.0 | >0%                | ≥98.15%    | none              | 142,744                   | 142,744               | EMMAX             |
| DESIR                          | GeneCall                                          | ALL                | ALL        | none              | 194,763                   | 194,763               | PLINK             |
| DILGOM                         | GenCall                                           | ALL                | ≥95%       | none              | 183,872                   | 183,872               | PLINK             |
| DPS cases                      | BeadStudio version 3.3.7,<br>GentraIn version 1.0 | >0%                | ≥98.15%    | none              | 138,569                   | 138,569               | EMMAX             |
| DPS controls                   | BeadStudio version 3.3.7,<br>GentraIn version 1.0 | >0%                | ≥98.15%    | none              | 145,465                   | 145,465               | EMMAX             |
| DR'S EXTRA cases               | BeadStudio version 3.3.7,<br>GentraIn version 1.0 | >0%                | ≥98.15%    | none              | 138,569                   | 138,569               | EMMAX             |
| DR'S EXTRA controls            | BeadStudio version 3.3.7,<br>GentraIn version 1.0 | >0%                | ≥98.15%    | none              | 145,465                   | 145,465               | EMMAX             |
| DUNDEE cases                   | GeneCall                                          | ≥1%                | ≥95%       | >10 <sup>-6</sup> | 180,399                   | 180,399               | SNPTEST           |
| DUNDEE controls                | GeneCall                                          | ≥1%                | ≥95%       | >10 <sup>-6</sup> | 180,399                   | 180,399               | SNPTEST           |

|                                |                                                   |     |         |                                                                    |         |         |         |
|--------------------------------|---------------------------------------------------|-----|---------|--------------------------------------------------------------------|---------|---------|---------|
| <b>EAS</b>                     | GeneCall                                          | >0% | ≥90%    | >10 <sup>-6</sup>                                                  | 184,558 | 134,470 | PLINK   |
| <b>EGCUT-CAD</b>               | GeneCall                                          | >0% | ≥90%    | >10 <sup>-6</sup>                                                  | 182,516 | 130,213 | GenABEL |
| <b>EGCUT-CONTROLS</b>          | GeneCall                                          | >0% | ≥90%    | >10 <sup>-6</sup>                                                  | 182,516 | 132,363 | GenABEL |
| <b>EGCUT-T2D</b>               | GeneCall                                          | >0% | ≥90%    | >10 <sup>-6</sup>                                                  | 182,516 | 131,317 | GenABEL |
| <b>EMIL</b>                    | GenCall                                           | NA  | ≥95%    | >10 <sup>-6</sup>                                                  | 183,031 | 183,031 | PLINK   |
| <b>Ely Study</b>               | GeneCall                                          | >0% | ≥90%    | >10 <sup>-6</sup>                                                  | 149,302 | 149,302 | PLINK   |
| <b>EPIC-Norfolk T2D</b>        | GeneCall                                          | >0% | ≥90%    | >10 <sup>-6</sup>                                                  | 143,294 | 143,294 | PLINK   |
| <b>Fenland</b>                 | GeneCall                                          | >0% | ≥90%    | >10 <sup>-6</sup>                                                  | 167,085 | 167,085 | PLINK   |
| <b>FUSION stage 2 cases</b>    | BeadStudio version 3.3.7,<br>Gentrain version 1.0 | >0% | ≥98.15% | none                                                               | 138,569 | 138,569 | EMMAX   |
| <b>FUSION stage 2 controls</b> | BeadStudio version 3.3.7,<br>Gentrain version 1.0 | >0% | ≥98.15% | none                                                               | 145,465 | 145,465 | EMMAX   |
| <b>GLACIER</b>                 | Illuminus                                         | >0% | ≥95%    | >10 <sup>-5</sup>                                                  | 149,782 | 149,782 | PLINK   |
| <b>HNR</b>                     | Genetrain2                                        | ALL | ≥95%    | >10 <sup>-6</sup>                                                  | 192,261 | 192,168 | PLINK   |
| <b>HUNT 2 cases</b>            | BeadStudio version 3.3.7,<br>Gentrain version 1.0 | >0% | ≥98.15% | NA                                                                 | 143,806 | 143,806 | EMMAX   |
| <b>HUNT 2 controls</b>         | BeadStudio version 3.3.7,<br>Gentrain version 1.0 | >0% | ≥98.15% | NA                                                                 | 143,806 | 143,806 | EMMAX   |
| <b>IMPROVE</b>                 | GeneCall                                          | >0% | ≥95%    | >10 <sup>-6</sup>                                                  | 185,704 | 183,645 | PLINK   |
| <b>KORA S3</b>                 | Genome Studio                                     | ALL | ALL     | none                                                               | 185,781 | 185,781 | PLINK   |
| <b>KORA S4</b>                 | Genome Studio                                     | ALL | ALL     | none                                                               | 185,781 | 185,781 | PLINK   |
| <b>Leipzig Adults</b>          | GeneCall                                          | >0% | ≥95%    | MAF >0.05: >5.7x10 <sup>-7</sup><br>MAF <0.05: >1x10 <sup>-4</sup> | 141,071 | 141,071 | SNPTEST |
| <b>LURIC</b>                   | GeneTrain 2                                       | ALL | ≥90%    | >10 <sup>-6</sup>                                                  | 191,341 | 191,341 | PLINK   |
| <b>METSIN cases</b>            | BeadStudio version 3.3.7,<br>Gentrain version 1.0 | >0% | ≥98.15% | none                                                               | 138,569 | 138,569 | EMMAX   |
| <b>METSIN controls</b>         | BeadStudio version 3.3.7,<br>Gentrain version 1.0 | >0% | ≥98.15% | none                                                               | 145,465 | 145,465 | EMMAX   |
| <b>MORGAM Cases</b>            | GenCall                                           | ALL | ALL     | none                                                               | 196,725 | 196,725 | PLINK   |
| <b>MORGAM Controls</b>         | GenCall                                           | ALL | ALL     | none                                                               | 196,725 | 196,725 | PLINK   |
| <b>NSHD</b>                    | GeneCall                                          | >0% | ≥90%    | >10 <sup>-6</sup>                                                  | 146,474 | 146,474 | PLINK   |
| <b>PIVUS</b>                   | GenCall                                           | ALL | ≥90%    | >10 <sup>-6</sup>                                                  | 185,450 | 185,450 | PLINK   |

|                        |                                                   |     |         |                   |         |         |         |
|------------------------|---------------------------------------------------|-----|---------|-------------------|---------|---------|---------|
| <b>STR</b>             | GenCall                                           | ALL | ≥90%    | >10 <sup>-6</sup> | 183,961 | 183,961 | Merlin  |
| <b>THISEAS</b>         | GenoSNP                                           | ALL | ≥98%    | >10 <sup>-7</sup> | 169,779 | 169,779 | PLINK   |
| <b>Tromsø cases</b>    | BeadStudio version 3.3.7,<br>Gentrain version 1.0 | >0% | ≥98.15% | none              | 139,415 | 139,415 | EMMAX   |
| <b>Tromsø controls</b> | BeadStudio version 3.3.7,<br>Gentrain version 1.0 | >0% | ≥98.15% | none              | 143,806 | 143,806 | EMMAX   |
| <b>ULSAM</b>           | GenCall                                           | ALL | ≥90%    | >10 <sup>-6</sup> | 183,357 | 183,357 | PLINK   |
| <b>WHITEHALL</b>       | GeneCall                                          | >0% | ≥90%    | >10 <sup>-6</sup> | 171,257 | 171,257 | PLINK   |
| <b>WTCCC-T2D</b>       | GeneCall                                          | ≥1% | ≥95%    | >10 <sup>-6</sup> | 180,655 | 180,655 | SNPTEST |

\* Call rate to exclude individuals for whom genotyping success rate is less than a certain percentage (to exclude 'bad' samples/DNA)

**Supplementary Table 22: Study-specific descriptive statistics of MetaboChip cohorts**

| Study                       | Trait                    | Men  |        |       |        |       |        |                      |                         | Women |        |       |        |       |        |                      |                         |
|-----------------------------|--------------------------|------|--------|-------|--------|-------|--------|----------------------|-------------------------|-------|--------|-------|--------|-------|--------|----------------------|-------------------------|
|                             |                          | n    | mean   | SD    | median | min   | max    | correlation with BMI | correlation with height | n     | mean   | SD    | median | min   | max    | correlation with BMI | correlation with height |
| <b>ADVANCE-CAD controls</b> | Age (yrs)                | 420  | 65.80  | 2.90  | 65.30  | 61.00 | 72.30  | -0.03                | -0.02                   | 243   | 65.70  | 2.90  | 65.50  | 60.60 | 71.20  | -0.15                | -0.14                   |
|                             | BMI (kg/m <sup>2</sup> ) | 420  | 28.40  | 4.50  | 27.60  | 19.90 | 46.60  | 1.00                 | -0.09                   | 243   | 28.00  | 6.20  | 27.00  | 17.40 | 50.40  | 1.00                 | -0.13                   |
|                             | Weight (kg)              | 420  | 87.90  | 14.90 | 85.20  | 59.60 | 136.40 | 0.88                 | 0.39                    | 243   | 73.70  | 16.50 | 70.70  | 44.20 | 128.20 | 0.94                 | 0.21                    |
|                             | Height (m)               | 420  | 1.76   | 0.07  | 1.76   | 1.57  | 1.95   | -0.09                | 1.00                    | 243   | 1.62   | 0.06  | 1.63   | 1.44  | 1.78   | -0.13                | 1.00                    |
|                             | WC (cm)                  | 419  | 99.50  | 12.60 | 98.50  | 66.50 | 154.00 | 0.89                 | 0.11                    | 243   | 85.80  | 13.40 | 84.80  | 58.70 | 131.60 | 0.92                 | -0.04                   |
|                             | Hip (cm)                 | NA   | NA     | NA    | NA     | NA    | NA     | NA                   | NA                      | 0     | NA     | NA    | NA     | NA    | NA     | NA                   | NA                      |
|                             | WHR (cm/cm)              | NA   | NA     | NA    | NA     | NA    | NA     | NA                   | NA                      | 0     | NA     | NA    | NA     | NA    | NA     | NA                   | NA                      |
| <b>ADVANCE-CAD cases</b>    | Age (yrs)                | 675  | 61.50  | 8.20  | 61.20  | 34.00 | 87.50  | -0.19                | -0.09                   | 220   | 66.20  | 6.30  | 66.40  | 47.90 | 80.10  | -0.81                | -0.22                   |
|                             | BMI (kg/m <sup>2</sup> ) | 675  | 29.10  | 4.80  | 28.20  | 17.80 | 53.70  | 1.00                 | -0.03                   | 220   | 29.00  | 6.40  | 28.00  | 16.90 | 66.10  | 1.00                 | -0.17                   |
|                             | Weight (kg)              | 675  | 90.29  | 16.04 | 87.91  | 48.40 | 164.65 | 0.90                 | 0.40                    | 220   | 75.57  | 16.52 | 73.44  | 44.91 | 149.10 | 0.92                 | 0.22                    |
|                             | Height (m)               | 675  | 1.80   | 0.10  | 1.80   | 1.60  | 2.00   | -0.03                | 1.00                    | 220   | 1.60   | 0.10  | 1.60   | 1.40  | 1.80   | -0.17                | 1.00                    |
|                             | WC (cm)                  | 675  | 99.90  | 12.00 | 98.40  | 70.20 | 148.00 | 0.89                 | 0.17                    | 217   | 89.20  | 14.10 | 88.40  | 59.90 | 132.30 | 0.90                 | 0.03                    |
|                             | Hip (cm)                 | 0    | NA     | NA    | NA     | NA    | NA     | NA                   | NA                      | 0     | NA     | NA    | NA     | NA    | NA     | NA                   | NA                      |
|                             | WHR (cm/cm)              | 0    | NA     | NA    | NA     | NA    | NA     | NA                   | NA                      | 0     | NA     | NA    | NA     | NA    | NA     | NA                   | NA                      |
| <b>AMC-PAS</b>              | Age (yrs)                | 368  | 43.50  | 5.14  | 44.50  | 24.00 | 50.00  | -0.05                | -0.06                   | 122   | 42.78  | 5.62  | 44.00  | 25.00 | 50.00  | 0.09                 | -0.09                   |
|                             | BMI (kg/m <sup>2</sup> ) | 368  | 27.13  | 3.81  | 26.70  | 18.50 | 40.60  | 1.00                 | 0.08                    | 122   | 26.19  | 5.09  | 25.30  | 17.40 | 41.20  | 1.00                 | -0.09                   |
|                             | Weight (kg)              | 368  | 88.09  | 14.84 | 86.00  | 50.00 | 150.00 | 0.88                 | 0.54                    | 122   | 73.08  | 14.85 | 70.00  | 49.00 | 122.00 | 0.93                 | 0.29                    |
|                             | Height (m)               | 368  | 1.80   | 0.07  | 1.80   | 1.59  | 2.04   | 0.08                 | 1.00                    | 122   | 1.67   | 0.06  | 1.67   | 1.50  | 1.83   | -0.09                | 1.00                    |
|                             | WC (cm)                  | 0    | NA     | NA    | NA     | NA    | NA     | NA                   | NA                      | 0     | NA     | NA    | NA     | NA    | NA     | NA                   | NA                      |
|                             | Hip (cm)                 | 0    | NA     | NA    | NA     | NA    | NA     | NA                   | NA                      | 0     | NA     | NA    | NA     | NA    | NA     | NA                   | NA                      |
|                             | WHR (cm/cm)              | 0    | NA     | NA    | NA     | NA    | NA     | NA                   | NA                      | 0     | NA     | NA    | NA     | NA    | NA     | NA                   | NA                      |
| <b>B1958C</b>               | Age (yrs)                | 1234 | 45.00  | 0.00  | 45.00  | 45.00 | 45.00  | NA                   | NA                      | 902   | 45.00  | 0.00  | 45.00  | 45.00 | 45.00  | NA                   | NA                      |
|                             | BMI (kg/m <sup>2</sup> ) | 1232 | 27.80  | 4.20  | 27.30  | 16.50 | 53.60  | 1.00                 | -0.02                   | 902   | 26.60  | 5.30  | 25.30  | 17.70 | 54.30  | 1.00                 | -0.16                   |
|                             | Weight (kg)              | 1234 | 85.90  | 14.80 | 84.60  | 47.00 | 158.90 | 0.89                 | 0.41                    | 902   | 70.10  | 14.30 | 67.00  | 42.00 | 143.50 | 0.92                 | 0.23                    |
|                             | Height (m)               | 1234 | 1.76   | 0.07  | 1.76   | 1.56  | 1.98   | -0.02                | 1.00                    | 902   | 1.62   | 0.06  | 1.63   | 1.22  | 1.84   | -0.16                | 1.00                    |
|                             | WC (cm)                  | 1234 | 98.10  | 11.80 | 97.20  | 73.10 | 151.20 | 0.80                 | 0.20                    | 902   | 83.90  | 14.30 | 82.40  | 60.50 | 133.80 | 0.76                 | 0.05                    |
|                             | Hip (cm)                 | 1234 | 105.30 | 9.10  | 105.10 | 86.20 | 152.40 | 0.64                 | 0.26                    | 902   | 103.90 | 13.80 | 102.40 | 82.80 | 157.60 | 0.71                 | 0.10                    |
|                             | WHR (cm/cm)              | 1234 | 0.90   | 0.50  | 0.90   | 0.74  | 1.20   | 0.08                 | 0.01                    | 902   | 0.80   | 0.70  | 0.80   | 0.63  | 1.10   | 0.02                 | 0.06                    |
| <b>BHS</b>                  | Age (yrs)                | 170  | 69.80  | 8.73  | 71.30  | 35.90 | 91.10  | -0.01                | -0.20                   | 93    | 70.50  | 9.73  | 71.70  | 41.60 | 91.60  | -0.06                | -0.33                   |
|                             | BMI (kg/m <sup>2</sup> ) | 169  | 26.70  | 3.59  | 26.30  | 18.00 | 38.70  | 1.00                 | -0.03                   | 93    | 26.30  | 4.65  | 25.40  | 18.70 | 44.50  | 1.00                 | 0.07                    |
|                             | Weight (kg)              | 169  | 79.90  | 12.20 | 79.80  | 51.40 | 109.00 | 0.86                 | 0.49                    | 93    | 67.60  | 13.10 | 66.00  | 46.00 | 107.00 | 0.94                 | 0.42                    |
|                             | Height (m)               | 170  | 1.73   | 0.07  | 1.72   | 1.56  | 1.89   | -0.03                | 1.00                    | 93    | 1.60   | 0.06  | 1.60   | 1.49  | 1.76   | 0.07                 | 1.00                    |
|                             | WC (cm)                  | 166  | 97.00  | 10.40 | 95.90  | 69.00 | 129.50 | 0.88                 | 0.19                    | 91    | 84.80  | 11.10 | 82.00  | 65.20 | 119.00 | 0.88                 | 0.18                    |
|                             | Hip (cm)                 | 164  | 100.70 | 7.70  | 100.90 | 82.00 | 137.00 | 0.83                 | 0.25                    | 91    | 102.70 | 10.90 | 100.20 | 86.00 | 140.20 | 0.93                 | 0.19                    |
|                             | WHR (cm/cm)              | 164  | 0.96   | 0.06  | 0.97   | 0.78  | 1.12   | 0.49                 | 0.01                    | 91    | 0.82   | 0.06  | 0.82   | 0.70  | 0.96   | 0.26                 | 0.05                    |
| <b>CARDIOGENICS</b>         | Age (yrs)                | 476  | 55.72  | 8.32  | 56.00  | 26.00 | 87.00  | -0.04                | -0.19                   | 278   | 54.25  | 7.64  | 55.00  | 39.00 | 79.00  | 0.06                 | -0.12                   |
|                             | BMI (kg/m <sup>2</sup> ) | 476  | 27.73  | 4.11  | 27.10  | 17.10 | 42.20  | 1.00                 | -0.09                   | 278   | 26.01  | 4.37  | 25.30  | 17.70 | 43.80  | 1.00                 | -0.02                   |

|                          |                          |      |        |       |        |        |        |       |       |      |        |       |        |        |        |       |       |
|--------------------------|--------------------------|------|--------|-------|--------|--------|--------|-------|-------|------|--------|-------|--------|--------|--------|-------|-------|
|                          | Weight (kg)              | 476  | 86.41  | 13.80 | 84.00  | 36.00  | 133.00 | 0.87  | 0.40  | 278  | 70.13  | 12.99 | 68.00  | 43.00  | 127.00 | 0.91  | 0.39  |
|                          | Height (m)               | 476  | 1.76   | 0.07  | 1.78   | 1.45   | 1.98   | -0.09 | 1.00  | 278  | 1.64   | 0.06  | 1.65   | 1.50   | 1.80   | -0.02 | 1.00  |
|                          | WC (cm)                  | 0    | NA     | NA    | NA     | NA     | NA     | NA    | NA    | 0    | NA     | NA    | NA     | NA     | NA     | NA    | NA    |
|                          | Hip (cm)                 | 0    | NA     | NA    | NA     | NA     | NA     | NA    | NA    | 0    | NA     | NA    | NA     | NA     | NA     | NA    | NA    |
|                          | WHR (cm/cm)              | 0    | NA     | NA    | NA     | NA     | NA     | NA    | NA    | 0    | NA     | NA    | NA     | NA     | NA     | NA    | NA    |
| <b>D2D 2007 cases</b>    | Age (yrs)                | 270  | 63.13  | 7.82  | 65.00  | 45.00  | 74.00  | -0.06 | -0.21 | 187  | 63.66  | 7.11  | 65.00  | 45.00  | 74.00  | -0.08 | -0.26 |
|                          | BMI (kg/m <sup>2</sup> ) | 270  | 29.95  | 5.01  | 29.14  | 20.20  | 48.27  | 1.00  | 0.03  | 187  | 31.38  | 6.12  | 30.66  | 19.27  | 52.68  | 1.00  | 0.06  |
|                          | Weight (kg)              | 270  | 92.26  | 16.46 | 90.40  | 57.70  | 150.00 | 0.90  | 0.41  | 187  | 81.68  | 16.75 | 79.10  | 49.90  | 137.40 | 0.95  | 0.35  |
|                          | Height (m)               | 270  | 1.75   | 0.06  | 1.75   | 1.56   | 1.95   | 0.03  | 1.00  | 187  | 1.61   | 0.05  | 1.61   | 1.48   | 1.74   | 0.06  | 1.00  |
|                          | WC (cm)                  | 269  | 107.74 | 12.19 | 106.00 | 79.00  | 150.00 | 0.91  | 0.21  | 187  | 101.14 | 14.92 | 101.50 | 67.00  | 145.00 | 0.91  | 0.12  |
|                          | Hip (cm)                 | 270  | 104.57 | 8.95  | 103.00 | 84.50  | 145.00 | 0.86  | 0.27  | 187  | 109.11 | 11.63 | 108.00 | 85.00  | 152.00 | 0.90  | 0.19  |
|                          | WHR (cm/cm)              | 269  | 1.03   | 0.06  | 1.03   | 0.83   | 1.22   | 0.55  | 0.06  | 187  | 0.93   | 0.07  | 0.92   | 0.73   | 1.14   | 0.53  | -0.02 |
| <b>D2D 2007 controls</b> | Age (yrs)                | 1014 | 59.62  | 8.42  | 60.00  | 45.00  | 74.00  | 0.05  | -0.30 | 1217 | 58.78  | 8.24  | 58.00  | 45.00  | 74.00  | 0.12  | -0.28 |
|                          | BMI (kg/m <sup>2</sup> ) | 1014 | 26.82  | 3.75  | 26.45  | 16.49  | 48.95  | 1.00  | -0.03 | 1217 | 26.97  | 4.93  | 26.30  | 17.21  | 61.34  | 1.00  | -0.12 |
|                          | Weight (kg)              | 1014 | 83.10  | 13.33 | 81.50  | 46.50  | 160.00 | 0.85  | 0.46  | 1217 | 71.45  | 13.50 | 69.80  | 41.90  | 158.60 | 0.91  | 0.27  |
|                          | Height (m)               | 1014 | 1.76   | 0.07  | 1.76   | 1.45   | 1.98   | -0.03 | 1.00  | 1217 | 1.63   | 0.06  | 1.63   | 1.41   | 1.83   | -0.12 | 1.00  |
|                          | WC (cm)                  | 1014 | 98.05  | 10.86 | 97.00  | 63.00  | 149.00 | 0.89  | 0.15  | 1215 | 88.89  | 12.23 | 87.50  | 62.00  | 150.00 | 0.91  | 0.05  |
|                          | Hip (cm)                 | 1014 | 99.59  | 6.78  | 99.00  | 79.00  | 141.00 | 0.79  | 0.33  | 1215 | 102.23 | 9.35  | 101.00 | 79.50  | 150.00 | 0.90  | 0.13  |
|                          | WHR (cm/cm)              | 1014 | 0.98   | 0.06  | 0.98   | 0.79   | 1.24   | 0.68  | -0.07 | 1214 | 0.87   | 0.06  | 0.86   | 0.72   | 1.17   | 0.59  | -0.04 |
| <b>DESIR</b>             | Age (yrs)                | 2108 | 46.14  | 10.16 | 45.00  | 30.00  | 65.00  | 0.30  | -0.32 | 1817 | 46.18  | 10.35 | 45.00  | 30.00  | 65.00  | 0.32  | -0.30 |
|                          | BMI (kg/m <sup>2</sup> ) | 2081 | 25.61  | 3.38  | 25.30  | 16.70  | 45.40  | 1.00  | -0.12 | 1777 | 24.79  | 4.28  | 24.00  | 15.40  | 53.60  | 1.00  | -0.20 |
|                          | Weight (kg)              | 2081 | 76.32  | 10.98 | 75.00  | 46.00  | 140.00 | 0.85  | 0.41  | 1777 | 62.98  | 10.94 | 61.00  | 37.00  | 127.00 | 0.90  | 0.24  |
|                          | Height (m)               | 2082 | 172.63 | 6.57  | 172.00 | 150.00 | 196.00 | -0.12 | 1.00  | 1778 | 159.47 | 6.04  | 160.00 | 141.00 | 188.00 | -0.20 | 1.00  |
|                          | WC (cm)                  | 2077 | 90.12  | 9.70  | 90.00  | 64.00  | 133.00 | 0.88  | 0.03  | 1773 | 78.78  | 10.67 | 77.00  | 57.00  | 125.00 | 0.87  | -0.05 |
|                          | Hip (cm)                 | 2077 | 97.65  | 6.43  | 97.00  | 78.00  | 134.00 | 0.79  | 0.26  | 1773 | 98.58  | 8.97  | 98.00  | 69.00  | 160.00 | 0.84  | 0.08  |
|                          | WHR (cm/cm)              | 2077 | 0.92   | 0.06  | 0.92   | 0.71   | 1.21   | 0.60  | -0.20 | 1773 | 0.80   | 0.07  | 0.79   | 0.54   | 1.06   | 0.46  | -0.17 |
| <b>DIAGEN cases</b>      | Age (yrs)                | 210  | 63.80  | 10.80 | 64.00  | 37.00  | 96.00  | -0.23 | -0.19 | 215  | 67.83  | 12.54 | 67.00  | 33.00  | 93.00  | -0.33 | -0.25 |
|                          | BMI (kg/m <sup>2</sup> ) | 210  | 29.25  | 4.63  | 28.66  | 18.94  | 44.64  | 1.00  | 0.02  | 215  | 30.97  | 7.12  | 30.04  | 15.63  | 61.71  | 1.00  | 0.07  |
|                          | Weight (kg)              | 210  | 88.18  | 15.36 | 86.25  | 58.00  | 134.40 | 0.88  | 0.45  | 215  | 79.77  | 20.29 | 77.70  | 40.00  | 168.00 | 0.93  | 0.39  |
|                          | Height (m)               | 210  | 1.73   | 0.07  | 1.74   | 1.56   | 1.92   | 0.02  | 1.00  | 215  | 1.60   | 0.06  | 1.60   | 1.41   | 1.79   | 0.07  | 1.00  |
|                          | WC (cm)                  | 210  | 106.59 | 11.65 | 105.00 | 74.00  | 138.00 | 0.84  | 0.22  | 215  | 102.40 | 15.97 | 102.00 | 67.00  | 150.00 | 0.81  | 0.23  |
|                          | Hip (cm)                 | 210  | 106.56 | 8.65  | 106.00 | 81.00  | 129.00 | 0.72  | 0.25  | 215  | 110.94 | 15.07 | 108.00 | 71.00  | 154.00 | 0.80  | 0.27  |
|                          | WHR (cm/cm)              | 210  | 1.00   | 0.06  | 0.99   | 0.83   | 1.15   | 0.52  | 0.05  | 215  | 0.92   | 0.08  | 0.92   | 0.72   | 1.16   | 0.19  | 0.01  |
| <b>DIAGEN controls</b>   | Age (yrs)                | 450  | 62.80  | 14.28 | 63.00  | 22.00  | 96.00  | -0.19 | -0.38 | 587  | 61.72  | 15.44 | 62.00  | 18.00  | 94.00  | 0.04  | -0.34 |
|                          | BMI (kg/m <sup>2</sup> ) | 450  | 26.85  | 3.42  | 26.30  | 18.94  | 39.88  | 1.00  | 0.01  | 587  | 27.00  | 5.04  | 26.22  | 17.55  | 58.94  | 1.00  | -0.01 |
|                          | Weight (kg)              | 450  | 82.38  | 12.67 | 80.90  | 50.00  | 137.00 | 0.80  | 0.56  | 587  | 71.74  | 14.63 | 70.00  | 40.00  | 149.00 | 0.89  | 0.40  |
|                          | Height (m)               | 450  | 1.75   | 0.07  | 1.75   | 1.53   | 1.96   | 0.01  | 1.00  | 587  | 1.63   | 0.07  | 1.63   | 1.42   | 1.85   | 0.40  | 1.00  |
|                          | WC (cm)                  | 450  | 99.15  | 10.15 | 99.00  | 68.00  | 142.00 | 0.76  | 0.13  | 587  | 91.43  | 13.74 | 90.00  | 60.00  | 148.00 | 0.74  | 0.06  |
|                          | Hip (cm)                 | 450  | 103.47 | 7.05  | 103.00 | 84.00  | 131.00 | 0.61  | 0.31  | 587  | 105.49 | 12.00 | 105.00 | 72.00  | 165.00 | 0.83  | 0.14  |
|                          | WHR (cm/cm)              | 450  | 0.96   | 0.07  | 0.95   | 0.65   | 1.20   | 0.50  | -0.11 | 587  | 0.87   | 0.09  | 0.86   | 0.63   | 1.26   | 0.27  | -0.08 |
| <b>DILGOM</b>            | Age (yrs)                | 1797 | 53.28  | 13.47 | 55.00  | 25.00  | 74.00  | 0.15  | -0.32 | 2139 | 51.74  | 13.58 | 53.00  | 25.00  | 74.00  | 0.24  | -0.38 |
|                          | BMI (kg/m <sup>2</sup> ) | 1791 | 27.24  | 4.17  | 26.65  | 15.82  | 63.11  | 1.00  | -0.06 | 2139 | 26.85  | 5.36  | 25.77  | 16.04  | 52.53  | 1.00  | -0.18 |
|                          | Weight (kg)              | 1791 | 84.00  | 14.06 | 82.20  | 50.10  | 192.60 | 0.89  | 0.41  | 2139 | 70.82  | 14.22 | 68.50  | 38.50  | 144.50 | 0.92  | 0.20  |
|                          | Height (m)               | 1797 | 175.50 | 6.79  | 175.40 | 151.70 | 201.00 | -0.06 | 1.00  | 2138 | 162.50 | 6.25  | 162.50 | 138.40 | 184.10 | -0.18 | 1.00  |

|                            |                          |      |        |       |        |       |        |       |       |      |        |       |        |       |        |       |       |
|----------------------------|--------------------------|------|--------|-------|--------|-------|--------|-------|-------|------|--------|-------|--------|-------|--------|-------|-------|
|                            | WC (cm)                  | 1787 | 96.78  | 11.97 | 95.50  | 64.00 | 172.00 | 0.91  | 0.07  | 2122 | 87.02  | 13.50 | 85.00  | 58.00 | 143.00 | 0.92  | -0.03 |
|                            | Hip (cm)                 | 1790 | 100.50 | 7.63  | 100.00 | 80.50 | 161.00 | 0.85  | 0.25  | 2122 | 102.00 | 10.82 | 100.50 | 75.50 | 162.00 | 0.92  | 0.02  |
|                            | WHR (cm/cm)              | 1784 | 0.96   | 0.07  | 0.96   | 0.75  | 1.22   | 0.65  | -0.15 | 2116 | 0.85   | 0.06  | 0.85   | 0.68  | 1.10   | 0.56  | -0.09 |
| <b>DPS cases</b>           | Age (yrs)                | 32   | 56.00  | 6.69  | 58.59  | 43.69 | 64.78  | -0.12 | -0.21 | 57   | 54.90  | 6.22  | 54.93  | 43.28 | 67.79  | -0.13 | -0.18 |
|                            | BMI (kg/m <sup>2</sup> ) | 32   | 30.63  | 3.13  | 31.54  | 24.37 | 37.81  | 1.00  | -0.08 | 57   | 32.92  | 4.36  | 32.19  | 25.59 | 45.76  | 1.00  | -0.26 |
|                            | Weight (kg)              | 32   | 94.01  | 11.43 | 90.00  | 78.20 | 122.50 | 0.86  | 0.34  | 57   | 87.36  | 12.51 | 86.60  | 67.00 | 136.50 | 0.77  | 0.34  |
|                            | Height (m)               | 32   | 1.75   | 0.06  | 1.76   | 1.65  | 1.90   | -0.08 | 1.00  | 57   | 1.63   | 0.06  | 1.62   | 1.48  | 1.77   | -0.26 | 1.00  |
|                            | WC (cm)                  | 32   | 107.22 | 9.23  | 105.50 | 88.30 | 127.00 | 0.75  | 0.22  | 57   | 103.00 | 10.31 | 102.50 | 82.30 | 126.00 | 0.73  | 0.14  |
|                            | Hip (cm)                 | 32   | 106.19 | 6.46  | 105.15 | 97.00 | 119.00 | 0.79  | 0.24  | 57   | 113.98 | 8.61  | 113.60 | 99.00 | 140.00 | 0.79  | 0.10  |
|                            | WHR (cm/cm)              | 32   | 1.01   | 0.05  | 1.01   | 0.89  | 1.09   | 0.35  | -0.01 | 57   | 0.90   | 0.06  | 0.90   | 0.79  | 1.03   | 0.26  | 0.04  |
| <b>DPS controls</b>        | Age (yrs)                | 116  | 56.40  | 7.08  | 59.00  | 41.00 | 65.90  | 0.07  | -0.35 | 267  | 55.01  | 7.29  | 56.94  | 40.09 | 67.91  | -0.18 | -0.20 |
|                            | BMI (kg/m <sup>2</sup> ) | 116  | 29.55  | 3.45  | 29.13  | 23.50 | 44.80  | 1.00  | 0.02  | 267  | 31.72  | 4.85  | 30.64  | 23.99 | 50.50  | 1.00  | 0.05  |
|                            | Weight (kg)              | 116  | 90.64  | 12.45 | 88.95  | 62.90 | 148.10 | 0.82  | 0.55  | 267  | 82.99  | 14.30 | 80.00  | 52.90 | 131.10 | 0.88  | 0.48  |
|                            | Height (m)               | 116  | 1.75   | 0.06  | 1.75   | 1.56  | 1.89   | 0.02  | 1.00  | 267  | 1.62   | 0.06  | 1.62   | 1.44  | 1.78   | 0.05  | 1.00  |
|                            | WC (cm)                  | 116  | 103.09 | 9.32  | 102.25 | 83.50 | 139.00 | 0.85  | 0.22  | 265  | 99.28  | 11.30 | 98.00  | 78.00 | 139.00 | 0.84  | 0.23  |
|                            | Hip (cm)                 | 116  | 104.94 | 7.58  | 104.65 | 88.00 | 143.50 | 0.80  | 0.32  | 267  | 112.12 | 10.78 | 110.00 | 90.30 | 161.00 | 0.87  | 0.25  |
|                            | WHR (cm/cm)              | 116  | 0.98   | 0.05  | 0.98   | 0.86  | 1.08   | 0.41  | -0.04 | 265  | 0.89   | 0.06  | 0.89   | 0.72  | 1.06   | 0.19  | 0.09  |
| <b>DR'S EXTRA Cases</b>    | Age (yrs)                | 60   | 69.06  | 5.88  | 70.84  | 57.81 | 78.12  | -0.24 | -0.40 | 61   | 68.28  | 5.74  | 69.67  | 57.92 | 77.72  | -0.05 | -0.35 |
|                            | BMI (kg/m <sup>2</sup> ) | 60   | 29.41  | 4.76  | 28.68  | 20.96 | 41.23  | 1.00  | 0.19  | 61   | 32.39  | 6.14  | 31.71  | 19.96 | 48.40  | 1.00  | -0.12 |
|                            | Weight (kg)              | 60   | 86.75  | 16.43 | 83.65  | 47.60 | 120.50 | 0.91  | 0.53  | 61   | 81.80  | 16.19 | 80.60  | 54.10 | 129.90 | 0.90  | 0.25  |
|                            | Height (m)               | 60   | 1.71   | 0.07  | 1.70   | 1.47  | 1.96   | 0.19  | 1.00  | 61   | 1.59   | 0.06  | 1.60   | 1.40  | 1.74   | -0.12 | 1.00  |
|                            | WC (cm)                  | 60   | 104.35 | 12.79 | 104.25 | 80.00 | 133.75 | 0.93  | 0.32  | 61   | 103.27 | 14.37 | 101.75 | 72.00 | 136.50 | 0.91  | 0.04  |
|                            | Hip (cm)                 | 60   | 103.32 | 10.41 | 101.00 | 81.00 | 132.50 | 0.87  | 0.41  | 61   | 110.29 | 11.53 | 109.00 | 91.00 | 145.00 | 0.88  | 0.00  |
|                            | WHR (cm/cm)              | 60   | 1.01   | 0.06  | 1.02   | 0.87  | 1.14   | 0.46  | 0.00  | 61   | 0.93   | 0.07  | 0.92   | 0.77  | 1.18   | 0.53  | -0.03 |
| <b>DR'S EXTRA Controls</b> | Age (yrs)                | 542  | 66.37  | 5.44  | 66.11  | 57.36 | 78.46  | -0.13 | -0.27 | 632  | 66.40  | 5.24  | 66.20  | 57.71 | 78.70  | 0.02  | -0.30 |
|                            | BMI (kg/m <sup>2</sup> ) | 542  | 27.14  | 3.51  | 26.83  | 19.31 | 44.21  | 1.00  | 0.06  | 632  | 27.16  | 4.62  | 26.26  | 15.96 | 48.57  | 1.00  | -0.12 |
|                            | Weight (kg)              | 542  | 82.13  | 12.40 | 80.80  | 51.30 | 135.90 | 0.86  | 0.53  | 632  | 69.47  | 12.22 | 67.85  | 41.90 | 143.20 | 0.90  | 0.29  |
|                            | Height (m)               | 542  | 1.74   | 0.06  | 1.74   | 1.57  | 1.93   | 0.06  | 1.00  | 632  | 1.60   | 0.06  | 1.60   | 1.42  | 1.78   | -0.12 | 1.00  |
|                            | WC (cm)                  | 542  | 97.49  | 10.07 | 96.63  | 73.00 | 136.50 | 0.87  | 0.28  | 632  | 87.44  | 11.99 | 86.25  | 59.50 | 130.50 | 0.89  | 0.03  |
|                            | Hip (cm)                 | 542  | 98.93  | 7.20  | 99.00  | 78.00 | 134.00 | 0.81  | 0.37  | 632  | 101.16 | 9.36  | 99.75  | 78.50 | 139.50 | 0.89  | 0.09  |
|                            | WHR (cm/cm)              | 542  | 0.98   | 0.05  | 0.98   | 0.84  | 1.12   | 0.59  | 0.05  | 632  | 0.86   | 0.06  | 0.86   | 0.70  | 1.05   | 0.56  | -0.06 |
| <b>DUNDEE controls</b>     | Age (yrs)                | 1918 | 60.20  | 11.09 | 61.00  | 36.00 | 79.00  | 0.01  | -0.26 | 1789 | 57.99  | 11.45 | 57.00  | 36.00 | 79.00  | 0.01  | -0.24 |
|                            | BMI (kg/m <sup>2</sup> ) | 1918 | 27.26  | 3.97  | 26.90  | 16.20 | 54.90  | 1.00  | -0.08 | 1788 | 26.81  | 5.02  | 26.00  | 14.30 | 51.60  | 1.00  | -0.15 |
|                            | Weight (kg)              | 1918 | 84.63  | 13.34 | 83.80  | 46.90 | 168.00 | 0.88  | 0.40  | 1788 | 70.46  | 13.50 | 68.55  | 33.00 | 125.60 | 0.91  | 0.27  |
|                            | Height (m)               | 1918 | 1.76   | 0.07  | 1.76   | 1.51  | 1.98   | -0.08 | 1.00  | 1789 | 1.62   | 0.07  | 1.62   | 1.43  | 1.85   | -0.15 | 1.00  |
|                            | WC (cm)                  | 1917 | 98.49  | 10.73 | 98.00  | 69.00 | 172.00 | 0.86  | 0.11  | 1787 | 86.69  | 12.30 | 86.00  | 61.00 | 153.00 | 0.84  | 0.02  |
|                            | Hip (cm)                 | 0    | NA     | NA    | NA     | NA    | NA     | NA    | NA    | 0    | NA     | NA    | NA     | NA    | NA     | NA    | NA    |
|                            | WHR (cm/cm)              | 0    | NA     | NA    | NA     | NA    | NA     | NA    | NA    | 0    | NA     | NA    | NA     | NA    | NA     | NA    | NA    |
| <b>DUNDEE cases</b>        | Age (yrs)                | 1929 | 63.19  | 9.49  | 64.00  | 36.00 | 88.00  | -0.26 | -0.18 | 1351 | 64.02  | 9.76  | 66.00  | 36.00 | 89.00  | -0.33 | -0.18 |
|                            | BMI (kg/m <sup>2</sup> ) | 1924 | 31.12  | 5.64  | 30.30  | 16.20 | 61.50  | 1.00  | -0.06 | 1346 | 32.93  | 7.05  | 32.00  | 16.40 | 62.30  | 1.00  | 0.00  |
|                            | Weight (kg)              | 1925 | 94.31  | 18.16 | 91.70  | 46.90 | 177.80 | 0.91  | 0.35  | 1347 | 84.58  | 19.33 | 82.58  | 42.20 | 164.00 | 0.94  | 0.35  |
|                            | Height (m)               | 1928 | 1.74   | 0.07  | 1.74   | 1.50  | 2.00   | -0.06 | 1.00  | 1348 | 1.60   | 0.06  | 1.60   | 1.40  | 1.86   | 0.00  | 1.00  |
|                            | WC (cm)                  | 1750 | 108.51 | 13.36 | 107.00 | 74.00 | 164.00 | 0.89  | 0.13  | 1215 | 103.67 | 15.16 | 103.00 | 62.00 | 177.00 | 0.84  | 0.16  |
|                            | Hip (cm)                 | 0    | NA     | NA    | NA     | NA    | NA     | NA    | NA    | 0    | NA     | NA    | NA     | NA    | NA     | NA    | NA    |

|                       | WHR (cm/cm)              | 0   | NA     | NA    | NA     | NA     | NA     | NA    | NA    | 0   | NA     | NA    | NA     | NA    | NA     | NA    | NA    |    |
|-----------------------|--------------------------|-----|--------|-------|--------|--------|--------|-------|-------|-----|--------|-------|--------|-------|--------|-------|-------|----|
| <b>EAS</b>            | Age (yrs)                | 353 | 64.73  | 5.60  | 64.76  | 54.73  | 75.36  | -0.01 | -0.22 | 378 | 64.24  | 5.71  | 63.93  | 54.92 | 75.20  | 0.03  | -0.24 |    |
|                       | BMI (kg/m <sup>2</sup> ) | 353 | 25.28  | 3.08  | 25.15  | 16.69  | 39.55  | 1.00  | -0.06 | 378 | 25.27  | 4.19  | 24.61  | 17.38 | 51.46  | 1.00  | -0.11 |    |
|                       | Weight (kg)              | 353 | 75.02  | 10.61 | 74.30  | 48.80  | 123.91 | 0.82  | 0.52  | 378 | 64.45  | 11.37 | 63.09  | 38.90 | 118.89 | 0.88  | 0.37  |    |
|                       | Height (m)               | 353 | 172.17 | 6.98  | 172.00 | 154.00 | 191.00 | -0.06 | 1.00  | 378 | 1.60   | 0.06  | 1.60   | 1.41  | 1.79   | -0.11 | 1.00  |    |
|                       | WC (cm)                  | 353 | NA     | NA    | NA     | NA     | NA     | NA    | NA    | 378 | NA     | NA    | NA     | NA    | NA     | NA    | NA    | NA |
|                       | Hip (cm)                 | 353 | NA     | NA    | NA     | NA     | NA     | NA    | NA    | 378 | NA     | NA    | NA     | NA    | NA     | NA    | NA    | NA |
|                       | WHR (cm/cm)              | 353 | NA     | NA    | NA     | NA     | NA     | NA    | NA    | 378 | NA     | NA    | NA     | NA    | NA     | NA    | NA    | NA |
| <b>EGCUT-CAD</b>      | Age (yrs)                | 355 | 63.50  | 10.20 | 64.00  | 36.00  | 94.00  | -0.24 | -0.27 | 613 | 64.50  | 10.50 | 64.00  | 32.00 | 93.00  | -0.29 | -0.25 |    |
|                       | BMI (kg/m <sup>2</sup> ) | 354 | 32.60  | 4.70  | 31.90  | 20.50  | 51.40  | 1.00  | -0.04 | 613 | 33.70  | 5.70  | 32.90  | 21.20 | 56.90  | 1.00  | -0.01 |    |
|                       | Weight (kg)              | 354 | 100.80 | 16.10 | 99.00  | 62.00  | 160.00 | 0.88  | 0.43  | 613 | 88.30  | 16.30 | 86.00  | 47.00 | 160.00 | 0.90  | 0.41  |    |
|                       | Height (m)               | 355 | 1.76   | 0.07  | 1.75   | 1.58   | 2.00   | -0.04 | 1.00  | 613 | 1.62   | 0.06  | 1.62   | 1.43  | 1.84   | -0.01 | 1.00  |    |
|                       | WC (cm)                  | 272 | 111.70 | 11.20 | 110.50 | 82.00  | 145.00 | 0.79  | 0.06  | 417 | 104.60 | 14.20 | 103.00 | 62.00 | 150.00 | 0.78  | 0.25  |    |
|                       | Hip (cm)                 | 272 | 110.10 | 11.20 | 110.00 | 70.00  | 155.00 | 0.64  | 0.13  | 417 | 116.00 | 14.00 | 115.00 | 63.00 | 165.00 | 0.76  | 0.27  |    |
|                       | WHR (cm/cm)              | 272 | 1.00   | 0.10  | 1.00   | 0.70   | 1.60   | 0.16  | -0.08 | 417 | 0.90   | 0.10  | 0.90   | 0.70  | 1.10   | 0.19  | 0.02  |    |
| <b>EGCUT-T2D</b>      | Age (yrs)                | 355 | 63.50  | 10.20 | 64.00  | 36.00  | 94.00  | -0.24 | -0.27 | 613 | 64.50  | 10.50 | 64.00  | 32.00 | 93.00  | -0.29 | -0.25 |    |
|                       | BMI (kg/m <sup>2</sup> ) | 354 | 32.60  | 4.70  | 31.90  | 20.50  | 51.40  | 1.00  | -0.04 | 613 | 33.70  | 5.70  | 32.90  | 21.20 | 56.90  | 1.00  | -0.01 |    |
|                       | Weight (kg)              | 354 | 100.84 | 16.09 | 99.00  | 62.00  | 160.00 | 0.88  | 0.43  | 613 | 88.28  | 16.33 | 86.00  | 47.00 | 160.00 | 0.90  | 0.41  |    |
|                       | Height (m)               | 355 | 1.80   | 0.10  | 1.80   | 1.60   | 2.00   | -0.04 | 1.00  | 613 | 1.60   | 0.10  | 1.60   | 1.40  | 1.80   | -0.01 | 1.00  |    |
|                       | WC (cm)                  | 272 | 111.70 | 11.20 | 110.50 | 82.00  | 145.00 | 0.79  | 0.06  | 417 | 104.60 | 14.20 | 103.00 | 62.00 | 150.00 | 0.78  | 0.25  |    |
|                       | Hip (cm)                 | 272 | 110.10 | 11.20 | 110.00 | 70.00  | 155.00 | 0.64  | 0.13  | 417 | 116.00 | 14.00 | 115.00 | 63.00 | 165.00 | 0.76  | 0.27  |    |
|                       | WHR (cm/cm)              | 272 | 1.02   | 0.09  | 1.01   | 0.70   | 1.57   | 0.16  | -0.08 | 417 | 0.90   | 0.07  | 0.90   | 0.71  | 1.12   | 0.19  | 0.02  |    |
| <b>EGCUT-CONTROLS</b> | Age (yrs)                | 341 | 54.40  | 11.00 | 55.00  | 35.00  | 86.00  | 0.23  | -0.33 | 601 | 50.00  | 10.10 | 49.00  | 34.00 | 93.00  | 0.21  | -0.30 |    |
|                       | BMI (kg/m <sup>2</sup> ) | 340 | 22.80  | 2.50  | 22.70  | 16.70  | 29.40  | 1.00  | -0.21 | 600 | 22.10  | 2.50  | 22.10  | 14.60 | 35.50  | 1.00  | -0.12 |    |
|                       | Weight (kg)              | 340 | 70.86  | 8.50  | 70.00  | 48.00  | 95.00  | 0.76  | 0.46  | 600 | 59.46  | 7.64  | 60.00  | 41.00 | 99.00  | 0.81  | 0.48  |    |
|                       | Height (m)               | 340 | 1.80   | 0.10  | 1.80   | 1.50   | 2.00   | -0.21 | 1.00  | 600 | 1.60   | 0.10  | 1.60   | 1.40  | 1.80   | -0.12 | 1.00  |    |
|                       | WC (cm)                  | 340 | 84.10  | 6.80  | 85.00  | 54.00  | 110.00 | 0.45  | 0.21  | 600 | 72.80  | 5.80  | 73.00  | 52.00 | 105.00 | 0.66  | 0.11  |    |
|                       | Hip (cm)                 | 340 | 94.90  | 7.70  | 96.00  | 57.00  | 115.00 | 0.37  | 0.19  | 600 | 95.10  | 7.20  | 95.00  | 64.00 | 122.00 | 0.55  | 0.26  |    |
|                       | WHR (cm/cm)              | 340 | 0.89   | 0.08  | 0.88   | 0.67   | 1.22   | 0.08  | 0.00  | 600 | 0.77   | 0.06  | 0.76   | 0.58  | 1.15   | 0.15  | -0.14 |    |
| <b>Ely Study</b>      | Age (yrs)                | 744 | 61.49  | 9.13  | 61.51  | 35.67  | 77.44  | -0.04 | -0.26 | 855 | 60.82  | 9.26  | 60.17  | 36.34 | 78.88  | 0.08  | -0.30 |    |
|                       | BMI (kg/m <sup>2</sup> ) | 744 | 27.36  | 3.99  | 26.81  | 15.98  | 45.82  | 1.00  | -0.05 | 855 | 27.29  | 5.37  | 26.33  | 16.89 | 59.28  | 1.00  | -0.13 |    |
|                       | Weight (kg)              | 744 | 83.07  | 13.31 | 81.00  | 48.50  | 134.50 | 0.85  | 0.43  | 855 | 71.11  | 14.34 | 68.50  | 38.00 | 145.00 | 0.89  | 0.29  |    |
|                       | Height (m)               | 744 | 1.74   | 0.07  | 1.74   | 1.55   | 2.00   | -0.05 | 1.00  | 855 | 1.61   | 0.06  | 1.61   | 1.46  | 1.80   | -0.13 | 1.00  |    |
|                       | WC (cm)                  | 736 | 100.00 | 10.60 | 99.40  | 71.25  | 144.00 | 0.84  | 0.14  | 852 | 87.56  | 12.60 | 85.88  | 57.25 | 143.25 | 0.85  | 0.03  |    |
|                       | Hip (cm)                 | 736 | 105.33 | 7.56  | 104.53 | 85.15  | 139.25 | 0.78  | 0.26  | 851 | 107.13 | 11.78 | 105.25 | 80.10 | 171.00 | 0.87  | 0.11  |    |
|                       | WHR (cm/cm)              | 735 | 0.95   | 0.06  | 0.95   | 0.75   | 1.14   | 0.54  | -0.06 | 851 | 0.82   | 0.06  | 0.81   | 0.58  | 1.04   | 0.34  | -0.08 |    |
| <b>EMIL</b>           | Age (yrs)                | 807 | 45.70  | 11.40 | 45.00  | 25.00  | 75.00  | 0.20  | -0.29 | 915 | 46.10  | 11.20 | 45.00  | 25.00 | 73.00  | 0.34  | -0.29 |    |
|                       | BMI (kg/m <sup>2</sup> ) | 807 | 27.70  | 4.70  | 26.90  | 17.20  | 57.50  | 1.00  | -0.09 | 908 | 26.70  | 6.30  | 25.00  | 14.80 | 60.20  | 1.00  | -0.11 |    |
|                       | Weight (kg)              | 807 | 86.20  | 15.60 | 84.00  | 49.00  | 180.00 | 0.90  | 0.35  | 908 | 71.70  | 17.30 | 67.50  | 37.20 | 174.00 | 0.94  | 0.23  |    |
|                       | Height (m)               | 807 | 1.76   | 0.67  | 1.76   | 1.49   | 1.96   | -0.09 | 1.00  | 915 | 1.64   | 0.66  | 1.64   | 1.44  | 1.91   | -0.11 | 1.00  |    |
|                       | WC (cm)                  | 767 | 95.30  | 12.20 | 94.00  | 60.00  | 153.00 | 0.88  | 0.03  | 855 | 82.80  | 13.10 | 80.00  | 53.00 | 137.00 | 0.89  | -0.03 |    |
|                       | Hip (cm)                 | 767 | 104.60 | 8.00  | 104.00 | 72.00  | 158.00 | 0.82  | 0.23  | 855 | 103.20 | 11.10 | 101.00 | 56.00 | 157.00 | 0.90  | 0.07  |    |
|                       | WHR (cm/cm)              | 767 | 0.91   | 0.07  | 0.91   | 0.64   | 1.150  | 0.63  | -0.18 | 855 | 0.80   | 0.07  | 0.80   | 0.56  | 1.27   | 0.49  | -0.14 |    |
| <b>EPIC-cohort</b>    | Age (yrs)                | 410 | 59.82  | 9.15  | 60.30  | 40.00  | 79.10  | 0.07  | -0.22 | 551 | 58.83  | 9.60  | 58.40  | 39.90 | 77.40  | 0.15  | -0.25 |    |







|                        |                          |      |        |       |        |        |        |       |       |        |        |       |        |        |        |       |       |
|------------------------|--------------------------|------|--------|-------|--------|--------|--------|-------|-------|--------|--------|-------|--------|--------|--------|-------|-------|
|                        | Hip (cm)                 | 373  | 120.39 | 24.78 | 116.00 | 71.00  | 204.00 | 0.92  | -0.01 | 526.00 | 125.69 | 26.09 | 126.00 | 63.00  | 192.00 | 0.91  | 0.08  |
|                        | WHR (cm/cm)              | 376  | 1.00   | 0.11  | 1.00   | 0.76   | 1.30   | 0.25  | 0.07  | 544.00 | 0.91   | 0.12  | 0.90   | 0.60   | 1.40   | 0.38  | -0.07 |
| <b>LURIC Cases</b>     | Age (yrs)                | 1678 | 63.06  | 9.82  | 63.78  | 26.87  | 88.46  | -0.08 | -0.22 | 573    | 66.24  | 9.62  | 67.19  | 34.00  | 92.00  | -0.04 | -0.13 |
|                        | BMI (kg/m <sup>2</sup> ) | 1678 | 27.50  | 3.78  | 27.05  | 17.51  | 57.10  | 1.00  | -0.06 | 573    | 27.21  | 4.62  | 27.02  | 16.35  | 46.09  | 1.00  | -0.05 |
|                        | Weight (kg)              | 1678 | 82.67  | 12.68 | 81.80  | 51.00  | 185.00 | 0.87  | 0.44  | 573    | 70.48  | 12.85 | 70.00  | 43.00  | 122.30 | 0.91  | 0.37  |
|                        | Height (cm)              | 1678 | 173.32 | 6.59  | 173.00 | 152.00 | 202.00 | -0.06 | 1.00  | 573    | 160.87 | 6.10  | 160.00 | 146.00 | 178.00 | -0.05 | 1.00  |
|                        | WC (cm)                  | 1652 | 101.00 | 10.70 | 100.00 | 61.00  | 165.00 | 0.76  | 0.12  | 566    | 94.86  | 13.32 | 94.00  | 63.00  | 135.00 | 0.80  | 0.12  |
|                        | Hip (cm)                 | 1652 | 102.53 | 8.89  | 102.00 | 66.00  | 165.00 | 0.68  | 0.18  | 566    | 103.78 | 11.48 | 103.00 | 70.00  | 150.00 | 0.79  | 0.18  |
|                        | WHR (cm/cm)              | 1652 | 0.99   | 0.06  | 0.98   | 0.63   | 1.61   | 0.33  | -0.05 | 566    | 0.91   | 0.08  | 0.91   | 0.68   | 1.22   | 0.29  | -0.04 |
| <b>LURIC Controls</b>  | Age (yrs)                | 330  | 54.89  | 12.45 | 55.62  | 17.25  | 87.85  | 1.00  | -0.31 | 315    | 62.14  | 11.02 | 62.69  | 26.97  | 90.71  | 0.03  | -0.22 |
|                        | BMI (kg/m <sup>2</sup> ) | 330  | 27.24  | 3.72  | 26.65  | 16.34  | 40.33  | 1.00  | -0.14 | 315    | 27.25  | 4.86  | 26.51  | 16.77  | 44.82  | 1.00  | -0.10 |
|                        | Weight (kg)              | 330  | 84.94  | 12.63 | 83.00  | 54.80  | 130.00 | 0.84  | 0.41  | 315    | 71.92  | 13.39 | 70.00  | 41.00  | 125.00 | 0.91  | 0.32  |
|                        | Height (cm)              | 330  | 176.59 | 7.09  | 176.00 | 160.00 | 198.00 | -0.14 | 1.00  | 315    | 162.40 | 6.53  | 163.00 | 141.00 | 189.00 | -0.10 | 1.00  |
|                        | WC (cm)                  | 327  | 99.37  | 10.69 | 98.00  | 68.00  | 139.00 | 0.78  | 0.02  | 310    | 92.86  | 12.40 | 93.00  | 58.00  | 134.00 | 0.78  | 0.11  |
|                        | Hip (cm)                 | 327  | 102.14 | 8.31  | 101.00 | 75.00  | 138.00 | 0.69  | 0.11  | 310    | 103.98 | 11.69 | 103.00 | 71.00  | 147.00 | 0.79  | 0.13  |
|                        | WHR (cm/cm)              | 327  | 0.97   | 0.07  | 0.97   | 0.70   | 1.20   | 0.40  | -0.10 | 310    | 0.89   | 0.07  | 0.89   | 0.65   | 1.18   | 0.19  | 0.01  |
| <b>METSIM cases</b>    | Age (yrs)                | 1109 | 60.26  | 6.56  | 60.00  | 45.00  | 74.00  | -0.16 | -0.21 | 0      | NA     | NA    | NA     | NA     | NA     | NA    | NA    |
|                        | BMI (kg/m <sup>2</sup> ) | 1109 | 30.22  | 5.22  | 29.41  | 18.29  | 55.54  | 1.00  | 0.00  | 0      | NA     | NA    | NA     | NA     | NA     | NA    | NA    |
|                        | Weight (kg)              | 1109 | 92.46  | 17.06 | 90.00  | 51.00  | 174.00 | 0.91  | 0.37  | 0      | NA     | NA    | NA     | NA     | NA     | NA    | NA    |
|                        | Height (m)               | 1109 | 1.75   | 0.06  | 1.75   | 1.57   | 1.93   | 0.00  | 1.00  | 0      | NA     | NA    | NA     | NA     | NA     | NA    | NA    |
|                        | WC (cm)                  | 1108 | 107.19 | 13.32 | 105.00 | 71.50  | 167.00 | 0.91  | 0.15  | 0      | NA     | NA    | NA     | NA     | NA     | NA    | NA    |
|                        | Hip (cm)                 | 1108 | 105.05 | 8.91  | 104.00 | 86.00  | 147.00 | 0.83  | 0.24  | 0      | NA     | NA    | NA     | NA     | NA     | NA    | NA    |
|                        | WHR (cm/cm)              | 1108 | 1.02   | 0.07  | 1.01   | 0.80   | 1.44   | 0.63  | 0.01  | 0      | NA     | NA    | NA     | NA     | NA     | NA    | NA    |
| <b>METSIM controls</b> | Age (yrs)                | 905  | 53.94  | 5.00  | 54.00  | 45.00  | 72.00  | -0.01 | -0.20 | 0      | NA     | NA    | NA     | NA     | NA     | NA    | NA    |
|                        | BMI (kg/m <sup>2</sup> ) | 905  | 26.40  | 3.37  | 26.04  | 18.51  | 48.06  | 1.00  | -0.06 | 0      | NA     | NA    | NA     | NA     | NA     | NA    | NA    |
|                        | Weight (kg)              | 905  | 82.55  | 11.90 | 81.50  | 45.00  | 154.00 | 0.84  | 0.45  | 0      | NA     | NA    | NA     | NA     | NA     | NA    | NA    |
|                        | Height (m)               | 905  | 1.77   | 0.06  | 1.77   | 1.55   | 1.96   | -0.06 | 1.00  | 0      | NA     | NA    | NA     | NA     | NA     | NA    | NA    |
|                        | WC (cm)                  | 905  | 95.85  | 9.63  | 95.00  | 74.00  | 152.00 | 0.86  | 0.17  | 0      | NA     | NA    | NA     | NA     | NA     | NA    | NA    |
|                        | Hip (cm)                 | 905  | 100.31 | 6.26  | 100.00 | 72.00  | 160.00 | 0.72  | 0.34  | 0      | NA     | NA    | NA     | NA     | NA     | NA    | NA    |
|                        | WHR (cm/cm)              | 905  | 0.95   | 0.06  | 0.95   | 0.78   | 1.19   | 0.65  | -0.05 | 0      | NA     | NA    | NA     | NA     | NA     | NA    | NA    |
| <b>MoRGAM Cases</b>    | Age (yrs)                | 1772 | 58.76  | 7.78  | 58.58  | 25.49  | 75.84  | -0.01 | -0.06 | 280    | 57.85  | 8.53  | 59.49  | 30.60  | 73.89  | 0.14  | -0.29 |
|                        | BMI (kg/m <sup>2</sup> ) | 1707 | 27.50  | 3.88  | 27.15  | 17.04  | 47.96  | 1.00  | -0.04 | 246    | 29.09  | 5.71  | 28.46  | 17.87  | 50.66  | 1.00  | -0.26 |
|                        | Weight (kg)              | 1708 | 81.71  | 12.79 | 80.60  | 50.20  | 129.00 | 0.88  | 0.43  | 246    | 72.82  | 14.05 | 71.35  | 46.90  | 132.00 | 0.92  | 0.14  |
|                        | Height (m)               | 1707 | 172.30 | 6.29  | 172.00 | 150.00 | 197.00 | -0.04 | 1.00  | 246    | 158.40 | 6.29  | 158.00 | 138.00 | 180.00 | -0.26 | 1.00  |
|                        | WC (cm)                  | 983  | 97.48  | 10.72 | 96.50  | 72.00  | 138.50 | 0.86  | 0.12  | 222    | 88.92  | 13.42 | 87.50  | 61.50  | 131.00 | 0.87  | -0.10 |
|                        | Hip (cm)                 | 984  | 101.00 | 7.78  | 100.00 | 75.00  | 137.00 | 0.76  | 0.20  | 222    | 105.80 | 10.28 | 104.80 | 82.50  | 147.50 | 0.90  | -0.06 |
|                        | WHR (cm/cm)              | 983  | 0.96   | 0.06  | 0.96   | 0.73   | 1.20   | 0.53  | -0.03 | 222    | 0.84   | 0.08  | 0.83   | 0.61   | 1.38   | 0.43  | -0.10 |
| <b>MoRGAM Controls</b> | Age (yrs)                | 2138 | 59.42  | 7.98  | 59.77  | 25.14  | 76.37  | 0.05  | -0.14 | 335    | 57.33  | 9.00  | 58.78  | 27.28  | 73.66  | 0.22  | -0.25 |
|                        | BMI (kg/m <sup>2</sup> ) | 2095 | 26.88  | 3.98  | 26.50  | 16.67  | 51.90  | 1.00  | -0.02 | 319    | 27.61  | 4.97  | 26.81  | 15.43  | 51.06  | 1.00  | -0.08 |
|                        | Weight (kg)              | 2095 | 80.58  | 13.26 | 79.60  | 42.80  | 154.00 | 0.89  | 0.43  | 320    | 69.86  | 13.49 | 68.20  | 40.80  | 134.00 | 0.90  | 0.36  |
|                        | Height (m)               | 2094 | 173.00 | 6.52  | 173.00 | 151.00 | 194.00 | -0.02 | 1.00  | 319    | 159.00 | 6.72  | 159.00 | 139.00 | 178.00 | -0.08 | 1.00  |
|                        | WC (cm)                  | 1084 | 95.14  | 10.94 | 94.50  | 64.00  | 144.00 | 0.88  | 0.12  | 287    | 85.26  | 12.32 | 83.50  | 60.50  | 121.00 | 0.87  | 0.04  |
|                        | Hip (cm)                 | 1084 | 100.60 | 7.65  | 100.00 | 74.50  | 144.00 | 0.78  | 0.24  | 287    | 103.60 | 9.43  | 102.00 | 82.50  | 144.00 | 0.87  | 0.16  |
|                        | WHR (cm/cm)              | 1084 | 0.95   | 0.07  | 0.95   | 0.67   | 1.16   | 0.59  | -0.07 | 287    | 0.82   | 0.07  | 0.82   | 0.68   | 1.08   | 0.56  | -0.11 |



|                  |                          |      |        |       |        |       |        |       |       |     |        |       |        |       |        |       |       |
|------------------|--------------------------|------|--------|-------|--------|-------|--------|-------|-------|-----|--------|-------|--------|-------|--------|-------|-------|
|                  | Weight (kg)              | 1112 | 80.40  | 11.42 | 79.50  | 46.00 | 138.70 | 0.87  | 0.42  | 0   | NA     | NA    | NA     | NA    | NA     | NA    | NA    |
|                  | Height (m)               | 1112 | 1.75   | 0.06  | 1.75   | 1.56  | 2.00   | -0.07 | 1.00  | 0   | NA     | NA    | NA     | NA    | NA     | NA    | NA    |
|                  | WC (cm)                  | 1094 | 94.75  | 9.54  | 94.00  | 51.00 | 137.00 | 0.87  | 0.13  | 0   | NA     | NA    | NA     | NA    | NA     | NA    | NA    |
|                  | Hip (cm)                 | 1094 | 100.16 | 7.07  | 100.00 | 51.00 | 141.00 | 0.78  | 0.28  | 0   | NA     | NA    | NA     | NA    | NA     | NA    | NA    |
|                  | WHR (cm/cm)              | 1094 | 0.95   | 0.05  | 0.95   | 0.78  | 1.14   | 0.58  | -0.11 | 0   | NA     | NA    | NA     | NA    | NA     | NA    | NA    |
| <b>WHITEHALL</b> | Age (yrs)                | 1699 | 60.51  | 5.82  | 59.38  | 50.69 | 72.93  | -0.06 | -0.13 | 535 | 60.60  | 5.79  | 59.81  | 50.47 | 72.85  | 0.06  | -0.16 |
|                  | BMI (kg/m <sup>2</sup> ) | 1699 | 26.65  | 3.63  | 26.30  | 18.10 | 44.80  | 1.00  | -0.07 | 535 | 27.14  | 5.31  | 26.20  | 16.30 | 47.70  | 1.00  | -0.10 |
|                  | Weight (kg)              | 1699 | 81.85  | 12.38 | 80.40  | 43.00 | 133.00 | 0.85  | 0.42  | 535 | 70.82  | 14.44 | 68.50  | 41.30 | 130.10 | 0.89  | 0.32  |
|                  | Height (m)               | 1699 | 1.75   | 0.07  | 1.75   | 1.44  | 1.98   | -0.07 | 1.00  | 535 | 1.62   | 0.06  | 1.61   | 1.39  | 1.80   | -0.10 | 1.00  |
|                  | WC (cm)                  | 1699 | 95.12  | 10.25 | 94.45  | 66.55 | 138.00 | 0.89  | 0.12  | 535 | 86.00  | 12.92 | 85.40  | 55.55 | 126.30 | 0.89  | 0.04  |
|                  | Hip (cm)                 | 1699 | 99.85  | 6.53  | 99.30  | 76.00 | 131.00 | 0.79  | 0.34  | 534 | 101.95 | 10.19 | 100.70 | 77.20 | 139.20 | 0.88  | 0.18  |
|                  | WHR (cm/cm)              | 1699 | 0.95   | 0.06  | 0.95   | 0.77  | 1.20   | 0.66  | -0.13 | 534 | 0.84   | 0.07  | 0.84   | 0.68  | 1.11   | 0.57  | -0.13 |
| <b>WTCCC-T2D</b> | Age (yrs)                | 626  | 56.30  | 10.20 | 57.00  | 20.80 | 87.00  | -0.19 | -0.11 | 448 | 56.40  | 11.10 | 57.90  | 19.40 | 80.10  | -0.15 | -0.11 |
|                  | BMI (kg/m <sup>2</sup> ) | 624  | 31.20  | 5.60  | 30.40  | 16.80 | 60.30  | 1.00  | 0.04  | 445 | 33.80  | 7.60  | 33.00  | 18.70 | 59.60  | 1.00  | -0.05 |
|                  | Weight (kg)              | 624  | 96.60  | 19.20 | 95.00  | 57.00 | 190.50 | 0.92  | 0.42  | 445 | 88.20  | 20.90 | 84.70  | 43.00 | 165.50 | 0.94  | 0.30  |
|                  | Height (m)               | 625  | 1.80   | 0.10  | 1.80   | 1.60  | 2.20   | 0.04  | 1.00  | 445 | 1.60   | 0.10  | 1.60   | 1.40  | 1.80   | -0.05 | 1.00  |
|                  | WC (cm)                  | 606  | 108.72 | 14.88 | 107.00 | 75.00 | 200.66 | 0.87  | 0.19  | 431 | 104.28 | 15.39 | 104.00 | 60.00 | 149.00 | 0.86  | 0.09  |
|                  | Hip (cm)                 | 606  | 110.22 | 11.95 | 109.00 | 86.40 | 215.90 | 0.76  | 0.22  | 431 | 116.24 | 15.54 | 114.00 | 79.50 | 172.00 | 0.89  | 0.09  |
|                  | WHR (cm/cm)              | 604  | 1.00   | 0.10  | 1.00   | 0.80  | 1.30   | 0.48  | 0.05  | 431 | 0.90   | 0.10  | 0.90   | 0.70  | 1.20   | 0.14  | 0.01  |

## Supplementary Note

### 1. Genome-wide association meta-analyses

#### 1.1 Genome wide association analysis (GWAS) in 250,000 individuals

- 1.1.1 Description of individual cohorts, genotyping methods, and quality control
- 1.1.2 Imputation
- 1.1.3 GWA analyses in individual studies
- 1.1.4 Quality control checks of individual studies
- 1.1.5 Meta-analysis of GWA studies

#### 1.2 GCTA-COJO: conditional and joint multiple SNPs analysis

- 1.2.1 Cluster analysis of signals within genomic loci

#### 1.3 Replication using independent studies typed with the Metabochip

- 1.3.1 Description of individual studies and genotyping methods
- 1.3.2 Metabochip analysis in individual studies
- 1.3.3 Quality control checks of individual studies
- 1.3.4 Meta-analysis of Metabochip
- 1.3.5 Metabochip replication results

#### 1.4 Validation of inflated statistics using linear mixed models in 59,380 individuals

- 1.4.1 Accounting for structure within individual studies through linear mixed models
- 1.4.2 GRM-ALL analysis
- 1.4.3 GRM-LOO (Leave One Out) analysis
- 1.4.4 GRM-O/E (Odd/Even) analysis (Women's Genome Health Study only)
- 1.4.5 Comparison of  $\lambda_{GC}$  inflation factors in GWA-based meta-analysis
- 1.4.6 Assessing the potential effect of duplicate or cryptically related samples

#### 1.5 Assessing stratification and winner's curse using family-based and non-family based cohorts

- 1.5.1 Family -based analyses for validation of inflated statistics using family transmission tests in a subset of 25,849 individuals
- 1.5.2 Estimation of winner's curse and stratification

### 2. Biological analyses

#### 2.1 Enrichment of associated SNPs in ENCODE regions, eQTLs and non-synonymous variants

- 2.1.1 Non-synonymous variants in strong LD with height SNPs
- 2.1.2 Association with other traits.
- 2.1.3 Enrichment in ENCODE annotated regions
- 2.1.4 eQTL analyses in peripheral blood
- 2.1.5 Biological enrichment analysis: OMIM genes

#### 2.2 Enrichment of genes in associated loci in reconstituted gene sets

- 2.2.1 Data-driven Enrichment-Prioritized Integration for Complex Traits (DEPICT) method – gene prioritization (T.H.P *et al.*, unpublished data).
- 2.2.2 DEPICT method – reconstituted gene set enrichment.
- 2.2.3 DEPICT method – enrichment of tissue and cell type annotations.
- 2.2.4 DEPICT method – false-discovery rate estimation
- 2.2.5 Construction of DEPICT-based gene evidence table
- 2.2.6 DEPICT method – overlap of reconstituted gene sets and visualization

**3. Acknowledgments**

**4. Affiliations of investigators from acknowledged consortia**

## **1. Genome-wide association meta-analysis**

We combined the height summary statistics from 79 genome-wide association (GWA) studies in a meta-analysis of 253,288 individuals.

### **1.1.1 Description of individual cohorts, genotyping methods, and quality control**

Descriptive characteristics, study design, sample size, sample quality control (QC) and anthropometric measurement technique for studies included in the primary GWA meta-analysis but not previously reported in Lango Allen *et al.* (2010)<sup>1</sup> are provided in **Supplementary Tables 17-19**. All participants provided written informed consent and the studies were approved by the respective Local Research Ethics committees or Institutional Review Boards.

Details on the genotyping platform used and genotype quality control procedures employed for each study are presented in **Supplementary Table 18**, while the basic anthropometric measures are summarised in **Supplementary Table 19**.

### **1.1.2 Imputation**

All cohorts were genotyped using commercially available Affymetrix (Affymetrix, Inc., Santa Clara, CA, USA), Illumina (Illumina, Inc. San Diego, CA, USA) genotyping arrays, or custom Perlegen (Perlegen Sciences, Inc. Mountain View, CA, USA) arrays. To facilitate meta-analysis, each group performed genotype imputation using BIMBAM<sup>2</sup>, MACH<sup>3,4</sup>, IMPUTE<sup>5</sup> BEAGLE<sup>6</sup> or PLINK<sup>7</sup> and genotypes from the Phase II CEU HapMap.

### **1.1.3 GWA analyses in individual studies**

Each GWA study tested association between each imputed or genotyped SNP and sex standardized height, assuming an additive inheritance model and adjusting for age and other appropriate covariates specific to the study (e.g. genotype-based principal components). Studies with unrelated individuals tested association under a linear regression framework. Studies with related samples used variance component or other linear mixed effects modelling to account for relatedness in the regression. The uncertainty of the imputed genotypes was taken into account in the association analysis using methods appropriate for the imputation software used.

The genomic control (GC) inflation factor was calculated for each of the GWA scans separately. The average GC inflation factor was 1.03. Genomic control correction was applied to results for each study prior to meta-analysis by multiplying SNP standard errors by the square root of the inflation factor.

### **1.1.4 Quality control checks of individual studies**

Each file was processed through a cleaning script<sup>8</sup> that performed several quality checks, including calculating the number of markers, ranges of test statistics, the genomic correction inflation factor, and NxMAF. From each study we excluded monomorphic SNPs and SNPs with poor imputation quality:  $rsq\_hat < 0.3$  (BEAGLE<sup>6</sup>, BIMBAM<sup>2</sup> and MACH<sup>3,4</sup>),  $proper\ info < 0.4$  (IMPUTE<sup>5</sup>), or  $info < 0.8$  (PLINK<sup>7</sup>). Additional checks to identify outlying study files were also made in attempt to ensure that correct transformations to the phenotype had been applied, correct assignment of the effect allele and effect allele frequency had been made, and that genomic control inflation factors and the proportion of previously published height SNPs<sup>1</sup> with directional consistency were consistent relative to sample size amongst other study files.

### **1.1.5 Meta-analysis of GWA studies**

A total of 2,550,858 autosomal SNPs were meta-analyzed across 174 input files (many of the 79 cohorts had separate male-female and/or case-control files). We did not apply a minor allele frequency cut-off, but we did apply an arbitrary cut-off of  $NxMAF > 3$  (equivalent



to a minor allele count of 6) to guard against extremely rare variants present in only one or two samples (possible genotyping/imputation errors or private mutations), for which regression coefficients are not estimated well using the standard statistical methods employed in most GWA statistical programs. We used the inverse-variance fixed effects meta-analysis method to combine the results from the individual studies. For comparison purposes, we also performed a sample size weighted  $Z$ -score based fixed effects meta-analysis. The correlation coefficient between the  $\log_{10}$  of the  $P$ -values of the inverse variance and sample size weighted meta-analysis was  $>0.99$ . Meta-analyses were performed using the software program METAL<sup>9</sup> ([www.sph.umich.edu/csg/abecasis/metal](http://www.sph.umich.edu/csg/abecasis/metal)).

## **1.2 GCTA-COJO: conditional and joint multiple SNPs analysis**

We used a conditional and joint (COJO) multiple SNPs analysis implemented in GCTA<sup>10,11</sup> to select the top associated SNPs. This method uses the summary statistics from the meta-analysis and LD correlations between SNPs estimated from a reference sample to perform a conditional association analysis<sup>10</sup>. The method starts with an initial model of the SNP that shows the strongest evidence of association across the whole genome. It then implements the association analysis conditioning on the selected SNP(s) to select the top SNPs one-by-one iteratively via a stepwise model selection procedure until no SNP has a conditional  $P$ -value that passes the significance level. Finally, all the selected SNPs are fitted jointly in the model for effect size estimation. The advantage of this method is that i) it uses summary statistics of the meta-analysis without having to access the individual-level genotype data which is usually unavailable in a large-scale meta-analysis; ii) it performs the conditional analysis iteratively so that there is no need to use arbitrary distance and LD thresholds to define the top associated SNP at a locus; iii) it is able to detect multiple associated SNPs at a single genomic locus.

We used the ARIC cohort as the reference sample for LD estimation<sup>1</sup>. We used 593,521 genotyped SNPs to create the genetic relatedness between 8,682 individuals of European ancestry. We removed one of each pair of individuals with an estimate of genetic relatedness  $> 0.025$  and retained 6,654 unrelated individuals. There were  $\sim 3.0\text{M}$  SNPs included in the original meta-analysis. We included in this analysis only the SNPs ( $\sim 2.48\text{M}$ ) on HapMap2 and with sample size  $> 50,000$ . We used the conventional genome-wide significance level ( $P < 5 \times 10^{-8}$ ) for SNP discovery and chose a range of less stringent significance levels ( $5 \times 10^{-3}$ ,  $5 \times 10^{-4}$ , ...,  $5 \times 10^{-7}$ ) to select SNPs for prediction analysis. We ignored the LD correlations between SNPs in  $> 20\text{Mb}$  distance or on different chromosomes. In addition, to avoid sample overlap in the subsequent prediction and estimation analyses, the target cohort in which the prediction or GCTA<sup>10,11</sup> estimation analysis (see below) was performed was excluded from the original meta-analysis. Using this method we identified 697 signals (**Supplementary Table 1**).

### **1.2.1 Cluster analysis of signals within genomic loci**

To test whether height-associated SNPs were non-randomly distributed over the genome, we constructed 10,000 random sets of 697 SNPs each that were matched based on allele frequency ( $\pm 5$  percentage points), nearby number of genes (using LD cut-off  $r^2 > 0.5$ ;  $\pm 10\%$  of seed SNP gene neighbor count), and gene proximity ( $\pm 20\text{kb}$ ). We used the number of secondary signals (distance less than 1Mb between neighboring SNPs) to test for non-random clustering. Among the 10,000 matched random sets, we observed an average of 200 (range 162 to 243) SNP-pairs by the matched SNPs compared to 273 with the set of 697 height SNPs. The observed distribution resulted in an empirical enrichment  $P$ -value  $< 0.0001$ .

We repeated the clustering analysis by estimating the total number of distance-wise genomic loci (distance between physically neighbouring SNPs more than the given distance

threshold, like for example 1Mb) by using same set of 10,000 sets of random matched SNP-sets across a range of locus size definitions, from 100kb to 1.25Mb. We also repeated the analyses using 50kb and 100kb sections of DNA at various distances from index variants – e.g. 50kb-100kb, 100kb-200kb, 200kb-300kb. We observed evidence of clustering regardless of locus size, but showed that the majority of clustering was driven by variants within windows <250kb. The results for the whole range of locus sizes are shown in **Supplementary Table 2**.

### **1.3 Replication using independent studies typed with MetaboChip**

We combined the height summary statistics from 37 MetaboChip-based association studies in a meta-analysis of 80,067 individuals.

#### **1.3.1 Description of individual studies and genotyping methods**

Descriptive characteristics, study design, sample size, sample quality control (QC) and anthropometric measurement technique for the studies included in the MetaboChip meta-analysis are provided in **Supplementary Tables 20-22**. All individuals were Caucasians of European ancestry. All participants provided written informed consent and the studies were approved by the respective Local Research Ethics committees or Institutional Review Boards.

Details on the genotype quality control procedures employed for each study are presented in **Supplementary Table 21**, while the basic anthropometric measures are summarised in **Supplementary Table 22**.

Studies were genotyped using Illumina's commercially available custom MetaboChip genotyping array<sup>12</sup>. Briefly, the array holds ~200,000 SNPs of interest for metabolic and atherosclerotic / cardiovascular disease traits. In addition, SNPs known to have reached genome-wide significance for any trait at the time of design are also present on the array.

#### **1.3.2 MetaboChip analysis in Individual studies**

Each GWA study tested association between each genotyped SNP and the same height transformations, adjustment, and inheritance model as described above. All studies comprised of unrelated individuals. Studies that also contributed to the primary GWA analysis removed any subjects that contributed to the primary GWA prior to analysis. We tested for association between SNPs and height using a linear regression framework.

The genomic control (GC) inflation factor was calculated for each of the MetaboChip scans separately. The average GC inflation factor was 1.03. Genomic control correction was applied to results for each study prior to meta-analysis. However, as MetaboChip contains SNPs associated with height and other anthropometric traits, we used a set 4,427 SNPs associated with QT interval present on MetaboChip to calculate, and control for, study inflation factors. This was to avoid over correction by incorporating SNPs already known to influence height.

#### **1.3.3 Quality control checks of individual studies**

Each file was processed through a cleaning script that performed several quality checks, including calculating the number of markers, ranges of test statistics, the genomic correction inflation factor, and  $N_x\text{MAF}$ . From each study we excluded monomorphic SNPs and SNPs with a call rate <95% and/or Hardy-Weinberg  $P < 1 \times 10^{-6}$ . Additional checks to identify outlying study files were also made as described in section 1.1.4.

#### **1.3.4 Meta-analysis of MetaboChip**

A total of 110,743 autosomal SNPs were meta-analyzed across 82 input files. We did not apply a minor allele frequency cut-off, but did apply the same  $N \times \text{MAF} > 3$  cut-off for SNP inclusion as used for the genome-wide analyses. We used exactly the same meta-analysis procedure as described for the GWAS. The correlation coefficient between the  $\log_{10}$  of the  $P$ -values of the inverse variance and sample size weighted meta-analysis was  $>0.99$ .

### 1.3.5 Metachip replication results

We aimed to replicate 403/697 lead SNPs identified through conditional analysis, significant prior to conditional analysis (i.e. genome-wide significance not driven through haplotype effects), and were either found on Metachip or had a proxy with  $r^2 \geq 0.8$  located  $\pm 500\text{kb}$  from the lead SNP. The “best” proxy was selected based on having the highest  $r^2$  and closest to the lead SNP, breaking any  $r^2$  ties (**Supplementary Table 3**). Proxies were obtained using the SNP Annotation and Proxy Search (SNAP) program<sup>13</sup> using data from HapMap release 22, HapMap 3, and 1000 Genomes Pilot 1.

We compared the number of signals that were significant based on the Metachip meta-analysis and identified 370/403 that reached  $P < 0.05$  (92%) and 126/403 (31%) that reached  $P < 5 \times 10^{-8}$  (**Supplementary Table 3**). We also compared effect sizes to analyse directional consistency between the two meta-analyses. As proxies were used and effect alleles not directly comparable, we limited the number of comparisons to 339/403 whereby either the same SNP was found on Metachip or the minor allele frequency (MAF) of both the original signal SNP and the proxy SNP was  $< 0.4$ . Proxy SNPs were compared by comparing the effect sizes of the minor allele in both datasets. In total, 309 and 105 reached  $P < 0.05$  and  $P < 5 \times 10^{-8}$ , respectively, of which all had directional consistency with the primary GWA meta-analysis (**Supplementary Table 3**).

Of the 403 SNPs put forward for replication, 293 represented signals that were not previously identified in a previous meta-analysis of height<sup>1</sup>. Previously identified SNPs were classified as having LD  $r^2 \geq 0.1$  within 500Kb of the lead SNP. Of the novel SNPs, 262/293 reached  $P < 0.05$  (89%) and 64/293 reached  $P < 5 \times 10^{-8}$  (22%).

## 1.4 Validation of inflated statistics using linear mixed models in 59,380 individuals

### 1.4.1 Accounting for structure within individual studies through linear mixed models

We used 15 studies ( $N=59,380$ ) of which 12 contributed to the main GWAS meta-analysis ( $N=35,962$ ). Each study performed additional association analyses by utilising linear mixed models (LMM) as implemented in EMMAX<sup>14</sup>. Briefly, for each LMM analysis, a genomic relationship matrix (GRM) was generated using directly genotyped SNPs available in each study to estimate the genetic similarity between all pairs of individuals. Males and females (and cases and controls where relevant) from the same study were combined to maximise the detection of genetic structure within each cohort. The matrix was then incorporated into the LMM for association testing of the imputed genotypes. The summary results from each study were then combined into an inverse-variance fixed-effects meta-analysis and inflation factors calculated based on SNPs with  $N > 25,000$  that passed imputation QC criteria (above). Three LMM analyses were performed: an “all” meta-analysis (GRM-ALL), a “leave-one-out” (GRM-LOO) meta-analysis, and an “odd/even” meta-analysis (GRM-O/E).

### 1.4.2 GRM-ALL analysis

Each study performed an association analysis whereby the genomic relationship matrix generated utilised all SNPs across the genome, effectively correcting for any genetic similarity amongst individuals genome-wide. As a quality check we compared the directional consistency of the 180 loci previously reported<sup>1</sup> for each study relative to sample size. The mean  $\lambda_{GC}$  value was 1.00 (**Supplementary Table 4**). After performing a meta-analysis, the overall  $\lambda_{GC}$  value was 1.20.

### **1.4.3 GRM-LOO (Leave One Out) analysis**

Each study (with the exception of the Women's Genome Health Study (see below)) performed a leave-one-out analysis whereby each chromosome was tested while adjusting for a genomic relationship matrix generated from directly genotyped SNPs from the other 21 chromosomes. As for the GWA and Metabochip analyses, we performed a quality check by comparing the directional consistency of the 180 loci previously reported for each study relative to sample size. The mean  $\lambda_{GC}$  value was 1.03 (**Supplementary Table 4**). The overall  $\lambda_{GC}$  value from meta-analysis was 1.21.

### **1.4.4 GRM-O/E (Odd/Even) analysis (Women's Genome Health Study only)**

The sample size of 21,354 in the Women's Genome Health Study (WGHS) precluded the creation of 22 individual GRMs due to computation constraints, which consequently excluded WGHS from the GRM-LOO analysis. Therefore, two GRMs were created using GCTA<sup>11</sup> that utilised variants on the odd and even chromosomes. The two genomic relationship matrices were then reformatted for EMMAX with R. SNPs on odd chromosomes were tested while correcting for the GRM calculated from the even chromosomes, and SNPs on even chromosomes were tested while correcting for GRM calculated from the odd chromosomes.

The  $\lambda_{GC}$  value obtained from GRM-O/E was 1.07. The  $\lambda_{GC}$  value based on the GWAS summary data was 1.13. These lambdas were based on SNPs with N=21,354 (all SNPs in the data available).

### **1.4.5 Comparison of $\lambda_{GC}$ inflation factors in GWA-based meta-analysis**

A fixed-effects inverse-variance meta-analysis of the "standard" GWAS summary data from the 15 studies (including three studies that were not part of the primary GWA meta-analysis) was performed to calculate  $\lambda_{GC}$  values corresponding to no genomic correction (1.24) and a single genomic correction (1.20). These  $\lambda_{GC}$  values were then used to determine whether the  $\lambda_{GC}$  from the linear mixed models were more consistent with adjustments through single- or double-genomic control.

Finally, we combined all 15 EMMAX-based studies together (N=59,380) and meta-analyzed GRM-ALL results and GRM-LOO + GRM-O/E to compare the  $\lambda_{GC}$  values obtained (1.20 and 1.29, respectively) to those obtained when meta-analyzing the GWA study data (single  $\lambda_{GC}$  = 1.23) (**Supplementary Table 4**)

### **1.4.6 Assessing the potential effect of duplicate or cryptically related samples**

To access the potential effect of any duplicate or cryptically related samples present between the studies, we calculated  $\lambda_{GC}$  in the overall meta-analysis after duplicating a study file and eliminating another study file with similar sample size (thus creating an entire set of duplicate samples larger than is likely to be present in the actual data). Meta-analyses with duplicate sample sets ranging from 450 to 3,800 individuals resulted in  $\lambda_{GC}$  ranging from 1.98 to 2.02, suggesting that duplicate samples or cryptically related samples, if present, would have a minimal impact on the overall inflation factor.

## **1.5 Assessing stratification and winner's curse using family-based and non-family based studies**

### **1.5.1 Family-based analyses for validation of inflated statistics using family transmission tests in a subset of 25,849 individuals**

Within family analysis was performed in seven studies (Amish, Framingham, TWINGENE, QIMR, SardinIA, Family Health Study and ERF) to assess confounding effects of stratification. We selected 416 genome-wide significant SNPs representing multiple loci ( $r^2 < 0.1$  and  $> 1\text{Mb}$  distance) by performing a single GC corrected meta-analysis that excluded these studies. Pure transmission-based tests for each of these SNPs were performed using the QFAM option in PLINK<sup>7</sup> with 100K permutations, except in ERF and SARDiNIA studies where QTDT<sup>15</sup> was used. QC filtering of SNPs for low imputation quality scores was followed by inverse variance method of meta-analysis of the summary statistics. Of 416 genome-wide significant SNPs, 371 (89%) had a consistent direction of effect after the meta-analysis of family based studies.

### 1.5.2 Estimation of winner's curse and stratification

We partitioned the effects of overestimates of effect sizes by looking at the deficit of replication compared with what would be expected in independent samples, both in family-based samples (where a deficit of replicating signals reflects overestimation of effect size due to both winner's curse and stratification) and in a random set of non-family-based samples (where a deficit of replicating signals reflects overestimation of effect size due to winner's curse alone).

To calculate the effective sample size of a study, we first estimated the linear relationship of the inverse of the median standard error to square root of sample size in the GIANT data (excluding the family-based studies, whose effective sample size is usually much lower than the actual sample size). We then used this linear relationship to determine the equivalent effective sample size for each study by measuring the median standard error for that study<sup>8</sup>. We generated new meta-analyses, after excluding a set of studies, either the family-based studies or in turn each of three sets of randomly selected, non-family-based studies. Each set of non-family-based studies was chosen to have a combined effective sample size similar to that of the family-based studies (**Supplementary Table 5**). For each new meta-analysis, we only applied the study specific single GC correction and estimated effect sizes and association results for each SNP. Apparently independent genome-wide significant SNPs were selected in the same way as for the overall meta-analysis ( $r^2 < 0.1$  and  $> 1\text{Mb}$  distance).

For these genome-wide significant SNPs, we then calculated the expected number of directionally consistent replications at various  $P$ -value thresholds in the excluded studies, by using the SNP effect sizes from the meta-analyses described above, the allele frequencies, and the combined effective sample size of the excluded studies. We then calculated the deficit in directionally consistent replicating signals at each  $P$ -value threshold as (number of SNPs expected to achieve the  $P$ -value threshold) minus (number of replications actually observed at that threshold).

The deficit in replication could arise from true positive signals whose effect sizes have been inflated by stratification or by the winner's curse (inflation of the effect size estimate in the meta-analysis used to identify the genome-wide significant SNPs). The deficit could also be due to completely false positive signals from stratification. To account for the winner's curse, we calculated the average deficit at each  $P$ -value threshold across the three sets of random non-family-based cohorts. We subtracted this average deficit from the deficit observed for the family-based cohorts to obtain an estimate of the remaining deficit attributable to stratification, arising from inflation of effect sizes of true associations and/or completely false positive associations.

To estimate the upper bound for completely false positive signals, we assumed that all of the deficit in replication was due to these false positives (If some of the deficit is attributable to inflation of effect sizes for true associations, it follows that fewer false positive signals would be needed to account for the deficit in replication.). We note that the observed deficit actually

underestimates the number of false positive associations slightly due to the expected rate of chance replication. Specifically, if there are  $k$  false positive associations, then we will observe  $k/2\alpha$  replications by chance, where  $\alpha$  is the  $P$ -value threshold. As such, the actual deficit will be  $k(1-0.5\alpha)$  instead of  $k$ . To account for these chance replications we therefore multiplied the deficit by the inverse of  $(1-0.5\alpha)$ , which is  $2/(2-\alpha)$ . For directional consistency, this correction factor is 2; for  $p < 0.05$ , the correction factor is  $\sim 1.03$ . We also adjusted the deficit to account for slight differences in the number of genome-wide significant SNPs in the meta-analyses excluding different sets of cohorts. (**Supplementary Table 5**).

We also examined the directional consistency of the SNPs available in the 7 family-based studies and observed an overall concordance of 89% after meta-analyzing the seven studies (**Supplementary Table 6**).

## 2. Biological analyses

### **2.1 Enrichment of associated SNPs in ENCODE regions, eQTLs and non-synonymous variants**

#### **2.1.1 Non-synonymous variants in strong LD with height SNPs**

For all 697 SNPs associated with height (method described in Section 1.2), we calculated the pair-wise linkage disequilibrium with the non-synonymous variants detected in the 1000 Genomes Phase 1 release. 100 SNPs out of 697 were in strong LD ( $r^2 \geq 0.8$ ) with at least one missense, nonsense, inframe deletion or inframe insertion. In total we identified 231 1000 Genomes Project data proxies, including 225 missense (including 3 initiator codon variants), 3 nonsense, 2 inframe-deletion and 1 inframe-insertion (**Supplementary Table 7**). We used the SNPinfo tool<sup>16</sup> (<http://snpinfo.nih.gov/snpinfo>) to annotate the predicted functional consequences of the identified non-synonymous proxies.

To test whether height-associated SNPs were enriched for non-synonymous variants in strong LD, we first pruned the 697 SNPs based on LD (cut-off  $r^2 > 0.1$ ), which left 628 SNPs. Using these SNPs we then constructed 10,000 random sets of 628 SNPs each that were matched based on allele frequency ( $\pm 5$  percentage points), nearby number of genes (using LD cut-off  $r^2 > 0.5$ ;  $\pm 10\%$  of seed SNP gene neighbor count), and gene proximity ( $\pm 20$ kb). Among the 10,000 matched random sets, we observed an average of 78 (range 0 to 114) non-synonymous variants tagged by the matched SNPs compared to 95 with the pruned set of 628 height SNPs. The observed distribution resulted in an empirical enrichment  $P$ -value  $< 0.02$ .

#### **2.1.2 Association with other traits**

The full NHGRI GWAS catalogue (<http://www.genome.gov/26525384>; accessed on 13th January 2013) was downloaded and all SNPs associated with diseases and traits other than anthropometric (height, BMI, Waist-Hip-Ratio and obesity) at genome-wide significance level ( $P < 5 \times 10^{-8}$ ) were extracted. We next identified all SNPs in strong LD ( $r^2 \geq 0.8$ ) with the 697 height-associated SNPs. Thirty-six of the 697 height SNPs tagged 45 NHGRI GWAS catalogue associations, of which 9 were the height SNP itself (**Supplementary Table 10**). Two height SNPs rs7980687 and rs8756 (two proxies at  $r^2 > 0.8$ ) were associated with childhood head circumference and adult brain structure, where the height increasing allele was also the trait increasing allele. Next we applied the same enrichment assessment framework (as described in section 2.1.1 above) to estimate if the height SNPs tend to show increased overlap with trait associated loci. Among the 10,000 random sets, we observed an average of 13 (range 0 to 26) trait associations from the NHGRI GWAS catalogue tagged ( $r^2 \geq 0.8$ ) by the matched SNPs compared to 33 with the pruned set of 628 height SNPs. The observed distribution resulted in an empirical enrichment  $P$ -value  $< 0.0001$ .

### 2.1.3 Enrichment in ENCODE annotated regions

The two main goals of this analysis were (1) to quantify whether the set of height SNPs identified were enriched for functional genomic elements as catalogued by the ENCODE Project<sup>17</sup> or the Roadmap Epigenomics Project ([www.roadmapepigenomics.org](http://www.roadmapepigenomics.org)), and (2) to use these functional annotations to prioritize functional variants. We downloaded all histone ENCODE tracks (with peak coordinates) available in Summer 2012 for the tier 1 (GM12878, K562, H1-hESC) and tier 2 (HUVEC, HepG2) ENCODE cell lines. We added to this list different epigenomic marks generated in osteoblasts and chondrocytes from bone marrow-derived mesenchymal stem cells by the Roadmap Epigenomics Project. Our algorithm to combine genetic and epigenetic data includes four steps. **STEP 1:** We used SNPs from the 1000 Genomes Project CEU dataset to generate 1,000 sets of variants that are matched with the height “seed” variants based on allele frequency, gene proximity and linkage disequilibrium (LD). Note only 672/697 associated SNPs could be found (and therefore matched) in the 1000 Genomes dataset. **STEP 2:** For each variant in the seed and matched sets, we retrieve all other variants in LD using data from the 1000 Genomes Project CEU datasets and the PLINK software ( $r^2 \geq 0.8$ ). **STEP 3:** We annotated all variants and their proxies in each of the 1,001 sets for overlap with ENCODE/Roadmap Epigenomics features of interest. **STEP 4:** We calculated the statistical significance of the enrichment for each track by counting the number of matched sets with equal or more SNP-peak overlaps than in the seed set of variants. Results from the enrichment analysis are presented in (**Supplementary Table 11**). In all cases, there was a strong enrichment ( $P < 0.001$ ) of peaks within these tracks for the height loci when compared to matched set of markers (**Supplementary Table 11**). These results are consistent with the previously reported enrichment of expression quantitative trait loci (eQTL) among the height loci that was observed in lymphoblastoid cell lines<sup>6</sup> and suggest that many of these loci will impact phenotype through the regulation of gene expression.

### 2.1.4 eQTL analysis in peripheral blood

We used *cis*-eQTL data from a total of 2,360 unrelated individuals obtained from three datasets with gene expression data measured from whole peripheral blood (1,240 individuals from Fehrmann-HT12v3, 229 individuals from Fehrmann-H8v2<sup>18</sup> and 891 individuals from the EGCUT study<sup>19</sup>). The gene expression data were obtained from total RNA in whole blood samples. Genotype data were first filtered for allele frequency ( $MAF > 0.01$ ), HWE ( $P < 1 \times 10^{-6}$ ), and SNP call rate (95%) before imputation using the Phase II CEU HapMap reference panel and imputation dosage values were used as genotypes during the analysis.

To avoid hybridization artifacts, we harmonized the data by aligning the gene expression probes to the human genome build 18 (Ensembl build 54) using BLAT, SOAPAlign v2, and BWA and excluding any probe that mapped to multiple genomic locations or contained more than two mismatches. Each expression dataset was normalized as follows: (1) quintile normalized, (2)  $\log_2$  transformed, and (3) standardized to have a mean of zero and variance equal to one. We used the software MixupMapper<sup>20</sup> to identify and remove sample mix-ups. To correct for possible population structure, we residualized the gene expression data on the first four multi-dimensional scaling components obtained from the genotypic data. We residualized the resulting variable on 40 PCs, derived from the variance-covariance matrix of the genotypic data, that did not show any significant evidence of association with the genotypes (and might therefore have a biological interpretation). A more detailed overview of the method has been published elsewhere<sup>21</sup>.

After normalization of the gene expression data, we correlated genotype dosages of the height-associated SNPs with gene expression values using Spearman's rank correlation. To detect *cis*-eQTLs, we assessed only those combinations of SNPs and probes where the

distance between SNP and the midpoint of the probe was smaller than 1 megabase (Mb). Individual datasets were meta-analyzed using a Z-score method, weighted for the sample size of each dataset. We then permuted the sample labels and repeated this analysis 100 times, in order to obtain the *P*-value distribution used to control the FDR at 5%. Since SNPs can be highly correlated due to LD, *cis*-eQTL effects are often caused by SNPs in high LD with the query SNP. In order to determine whether the height-associated SNPs have independent *cis*-eQTL effects with respect to other SNPs in their locus, we performed a conditional analysis. Using the procedure described above, we first determined which SNPs show the strongest *cis*-eQTL (eSNP) effect for each of the probes associated with the 697 height-associated SNPs. Then, we adjusted the gene expression data for these effects using linear regression, and repeated the *cis*-eQTL analysis on the height SNPs (and vice-versa). This analysis allowed us to identify height-associated variants that were also the best *cis*-eQTL SNP.

We observed a significant *cis*-effect for 295 out of 697 height SNPs, of which 21 were identified as the best eQTL SNP for a given probe (**Supplementary Table 8**). A further 54 SNPs showed residual independent effect on expression after conditioning on the best eQTL SNP in each locus that in combination affected the expression levels for 56 genes. To test if the height-associated SNPs are enriched for SNPs associated with *cis* gene expression, we performed an eQTL lookup with the 10,000 random SNP-sets described in section 2.1.1. On average we observed 272 (range 0 to 321) significant (FDR<0.05) *cis*-effects, of which on average 16 (range 0 to 33) were identified as best eQTL SNPs. The respective counts for the pruned set of 628 height SNPs were 281 and 24. The observed distribution gives an empirical enrichment *P*-value of 0.59 for *cis*-eQTL effects and *P*-value of 0.03 for best eQTL SNP.

### 2.1.5 Biological enrichment analysis: OMIM genes

Using the Online Mendelian Inheritance in Man (OMIM) (<http://www.omim.org>) database we updated a previously used list<sup>1</sup> of genes that are either 1) linked to human monogenic conditions or syndromes characterized by abnormal skeletal growth, 2) known to regulate growth hormone levels or 3) involved in growth plate physiology. This annotation resulted in 266 “OMIM genes” (**Supplementary Table 9**). We then assessed if a listed OMIM gene was the nearest to the identified height-associated SNP. We observed 39 instances (~14.7%) whereby the OMIM gene was the closest coding gene (**Supplementary Table 9**). When performed a similar search in each locus (see 2.2.2 for details) we observed 73 OMIM genes. We assessed the significance of this result by generating 10,000 matching sets for the 628 height SNPs (see Section 2.1.1) and annotated the nearest coding gene. In the 10,000 random sets the median count of OMIM genes was 54 (range 26 to 88), which was lower than the 73 OMIM genes observed among the 628 observed SNPs (empirical enrichment *P*-value 0.013).

## 2.2. Enrichment of genes in associated loci in reconstituted gene sets

**2.2.1 Data-driven Enrichment-Prioritized Integration for Complex Traits (DEPICT) method – gene prioritization (T.H.P *et al.*, unpublished data).** Prioritization of genes within a given associated locus was accomplished by (1) correlating a given gene’s predicted functions (henceforth referred to as co-functionality vector, representing the gene’s membership across all reconstituted gene sets) with the co-functionality vector of genes from all other associated loci, (2) summarizing the given gene’s overall pair-wise relatedness as Z-score, (3) adjusting the given gene’s Z-score by the number of genes in the given locus, and (4) re-computing steps #1-#3 1,000 times based on random loci that were matched by gene density and using the 1,000 null scores to adjust the observed Z-score from step 3 for potential gene length bias and potential biases in the gene expression data, and (5) converting the Z-score to a *P*-value. Please refer to the Supplementary Note section 2.2.4



for a description of the empirical false discovery rate estimation, and to Supplementary Note section 2.2.5 for information on the construction of the gene evidence table used to highlight genes in the main text of this paper.

**2.2.2 DEPICT method – reconstituted gene set enrichment.** For a given reconstituted gene set, DEPICT quantified enrichment by (1) summing the co-functionality Z-scores of all genes within each associated locus and then computing the sum across all loci, (2) repeating step #1 1,000 times based on random loci that were matched by gene density and using the 1,000 null Z-scores to adjust the observed Z-score by subtracting their mean and dividing with their standard deviation (3) converting the adjusted Z-score to a *P*-value. Please refer to the Supplementary Note section 2.2.4 for a description of the empirical false discovery rate estimation to Supplementary Note section 2.2.6 for information on the gene set pruning and visualization. Supplementary Table 12 lists of pruned gene sets with  $P < 1 \times 10^{-11}$ , for the complete list of significant gene sets please refer to the GIANT website (see URLs).

**2.2.3 DEPICT method – enrichment of tissue and cell type annotations.** We used DEPICT to assess whether genes within associated loci were specifically expressed in any of the 209 tissue and cell type annotations present in the gene expression data used in DEPICT. The expression data was based on the available Affymetrix HGU133a2.0 platform human sample microarrays. For each microarray the tissue of origin was determined by text-mining the Gene Expression Omnibus database microarray sample description (SOFT files) for tissue-related Medical Subject Heading (MeSH) terms. We limited this analysis to terms starting with A2-9, A10-11, A14-15, and A17. Individual microarray samples were allowed to map to several tissue or cell type annotations, and we restricted the analysis to tissue annotations comprising at least 10 microarrays. When mapping microarrays to a given MeSH term, we included all microarrays annotated to terms that according to the MeSH ontology were children of the given term. Consequently several of the tissue and cell type annotations were not independent from each other. The expression matrix comprised 19,997 genes and 37,427 samples (the number of samples left after QC of the 43,278 Affymetrix HGU133a2.0 platform human microarray samples) spanning 209 MeSH terms. To down-weight genes that were highly expressed across the majority of tissue or cell type annotations (and hence non-informative in the analysis), we  $N(0,1)$  standardized each gene's expression values across all tissues. Hereafter we averaged the expression of microarray samples that were annotated with the same MeSH term. The enrichment procedure and calculation of false discovery rates was conceptually similar to the gene set enrichment approach except that the processed expression matrix (genes x tissue annotations) was substituted for the co-functionality matrix (genes x gene sets) for scoring.

We previously conducted a principal component analysis on the probe correlation matrices of 77,840 microarrays samples from four Affymetrix platforms, resulting in the identification of a total of 2,206 robustly estimated principal components (377 for Human Genome U133A, 777 for Human Genome U133 Plus 2.0, 677 for Mouse Genome 430 2.0 and 375 for Rat Genome 230 2.0; See Cvejic *et al.*<sup>22</sup> for more information.) Furthermore, we showed that genes in predefined gene sets may enrich for high or low loading genes on these principal components. In order to construct the DEPICT cofunctionality matrix, which defined the reconstituted gene sets (and genes' predicted functional annotations), we first ascertained 14,461 predefined gene sets (see below) for enrichment on each of the 2,206 principal components (using a *t* test). To ensure normality, the *P*-values were converted into 'enrichment' Z-scores, which for each pre-defined gene sets resulted in a Z-score vector across principal components. We subsequently assessed all individual genes, and correlated the 14,461 enrichment Z-score vectors with the 2,206 PC eigenvector coefficients that we had per gene. Significant positive correlation indicated that a gene was likely to operate in that pathway. To avoid circularity in cases where the gene was part of the given predefined gene set, we left out the gene from the gene set, recomputed the gene set's

enrichment Z-score vector along all components and then correlated the gene with the gene set' Z-score vector. This correlation matrix of genes by gene sets – referred to as co-functionality matrix in the main text – comprised 19,997 genes and 14,461 gene sets and quantified each gene's likelihood to be part of a given gene set. A visual description of the concept behind this method can be found at [www.genenetwork.nl/genenetwork](http://www.genenetwork.nl/genenetwork) (click on "Method"), and it was recently used to identify *SMIM1* as the gene that is responsible for the VEL-blood group<sup>22</sup>. Using this procedure we reconstituted existing various pathways and gene sets: 737 Reactome pathways<sup>23</sup>, 5,083 Gene Ontology terms<sup>24</sup>, 184 KEGG pathways<sup>25</sup>, and 2,473 phenotypic gene sets (based on 211,882 gene-phenotype pairs from the Mouse Genetics Initiative<sup>26</sup>) and 5,984 molecular pathways (based on 169,810 high-confidence experimentally-derived protein-protein interactions<sup>27</sup>).

#### 2.2.4 DEPICT method – false-discovery rate estimation

To estimate empirical false-discovery rates (FDR) that further controlled for effects of factors such as gene size and gene set composition, we repeated the DEPICT analysis 50 times. Each repeated randomized run was based on 566 input regions (See Online Methods) that were drawn from the pool of random regions matching for gene density. FDRs for the best prioritized gene at each region were estimated by first ordering the regions by the *P*-value (increasingly) of each regions' best-prioritized gene (henceforth referred to as 'tier one genes'). The same was done for each of the 50 repeated runs. The FDR for the region with the best tier one gene was estimated by counting the number of regions across all 50 randomized runs that contained a tier one gene with a *P*-value equal to or smaller than the observed regions' tier one gene's *P*-value. This count was divided by the number of randomized runs ( $n=50$ ) multiplied by region-rank, where region-rank was the rank of the observed region (i.e. 1). Similarly, the FDR for the second best prioritized region and its tier one gene was estimated counting the number of regions across the 50 randomized runs that comprised a tier one gene with a *P*-value equal to or less than the tier one gene of the second best region. The FDR was then calculated by dividing this count by the  $50 \times 2$ . Using this procedure, an FDR was estimated for the tier one gene in each region. To enable prioritization of multiple genes at a given region, we estimated FDRs for genes that were not tier one genes, but nevertheless exhibited low *P*-values (henceforth referred to as 'tier two genes'). We only considered genes that had *P*-values smaller than the *P*-value of least well prioritized tier one gene, which still had  $FDR < 0.05$ . The tier 'two' genes' FDRs were estimated by ranking all genes in all regions by their *P*-value and assigning the tier two genes the FDR of the next tier one gene in that list. To estimate the FDR for a given gene set we relied on the same pool of randomized regions as described in the Online Methods for DEPICT. First, we counted the number of gene sets across all 50 randomized runs that had a *P*-value equal to or smaller than the observed *P*-value of the given gene set. We then divided this count by the number of repetitions ( $n=50$ ) multiplied by gene set-rank, where gene set-rank was the rank of the given gene set (among all gene sets ordered by increasing *P*-values).

#### 2.2.5 Construction of DEPICT-based gene evidence table

**Supplementary Table 16** includes all genes within any of the 566 DEPICT regions that were significantly prioritized ( $FDR < 0.05$ ). Table columns either contain region specific information (such as genes that have missense variants in LD with or are nearest to the lead SNP), or qualitative/quantitative indications for a given genes' connection with height (such as DEPICT *P*-values). Unless otherwise stated, 'No' denotes that there was no evidence, while 'Yes' means that there was evidence. The 'OMIM human stature gene' column is based on the list of manually curated list of human stature genes<sup>28</sup> described in Section 2.1.5 and outlined in **Supplementary Table 9**. The 'Nominally significant in GRAIL' column reports whether a given gene was nominally significant in the GRAIL method (**Supplementary Table 13**) (GRAIL was run with the 697 SNPs as input, and no gene length correction was applied). The 'Associated with rodent growth plate differential tissue expression' column indicates whether the given gene has been reported to be differentially

expressed between growth plate cartilage and soft tissues (lung, kidney, heart) in male mice<sup>28</sup>. The 'Associated with rodent temporal and spatial growth plate differential expression' indicates whether the given gene has been reported to be spatially regulated across different growth plate zones (resting vs. proliferative or proliferative vs. hypertrophic) or temporally regulated between 3-week and 12-week proliferative zones in male rats<sup>28</sup>. The 'Mouse Genome Informatics database evidence' column denotes whether the given gene leads to a 'limbs/digits/tail' or skeleton phenotype (phenotype IDs MP:0005371, MP:0005390) upon knockout in mice. Knockout data was downloaded from the Mouse Genome Project database<sup>26</sup>. The 'Within prioritized gene set' column lists whether the given gene was part of a reconstituted gene set that was significantly (FDR<0.05) prioritized in the DEPICT analysis. Genes were considered to be part of a given reconstituted gene set if their Z-score for the particular gene set was above 4.75 (comparable to  $P < 10^{-6}$ ). The 'Blood eQTL in blood' column lists whether the given gene has been reported to be transcriptionally regulated in whole blood by one of the associated SNPs (or a SNP in linkage disequilibrium,  $r^2 > 0.7$ , with any of the associated SNPs). The expression quantitative trait locus (eQTL) data originated from a large-scale eQTL meta-analysis<sup>21</sup>. The '1000 Genomes Project nsVariant' column listed whether a gene had a missense variant (**Supplementary Table 7**), that was in linkage disequilibrium with any of the associated SNPs (or a SNP in high linkage disequilibrium,  $r^2 > 0.7$ ) with any of the associated SNPs). The missense variants data originated from the 1000 Genomes Project Phase 1 data<sup>29</sup> (Download date 11/20/2012).

### 2.2.6 DEPICT method – overlap of reconstituted gene sets and visualization

To assess overlap of significant results from the DEPICT gene set enrichment analysis, we first computed the pairwise overlap of all gene sets with false-discovery rates less than 0.05. Hereafter, network diagrams were used to visualize pathway similarity by representing gene sets as nodes and gene set to gene set similarity as edges. All gene sets with a similarity above 0.1 were connected by an edge, gene sets with similarities above 0.25 were merged into single meta nodes, and edges were scaled according degree of similarity (ranging from 0.1 to 0.25). Similarity was calculated based on the *Jaccard* index, which is commonly used to assess the similarity between sets. The Cytoscape software<sup>30,31</sup> was used to construct the network figure.

## References

1. Lango Allen, H. *et al.* Hundreds of variants clustered in genomic loci and biological pathways affect human height. *Nature* **467**, 832-8 (2010).
2. Scheet, P. & Stephens, M. A fast and flexible statistical model for large-scale population genotype data: applications to inferring missing genotypes and haplotypic phase. *Am J Hum Genet* **78**, 629-44 (2006).
3. Li, Y., Willer, C., Sanna, S. & Abecasis, G. Genotype imputation. *Annu Rev Genomics Hum Genet* **10**, 387-406 (2009).
4. Li, Y., Willer, C.J., Ding, J., Scheet, P. & Abecasis, G.R. MaCH: using sequence and genotype data to estimate haplotypes and unobserved genotypes. *Genet Epidemiol* **34**, 816-34 (2010).
5. Marchini, J., Howie, B., Myers, S., McVean, G. & Donnelly, P. A new multipoint method for genome-wide association studies by imputation of genotypes. *Nat Genet* **39**, 906-13 (2007).
6. Browning, S.R. & Browning, B.L. Rapid and accurate haplotype phasing and missing-data inference for whole-genome association studies by use of localized haplotype clustering. *Am J Hum Genet* **81**, 1084-97 (2007).
7. Purcell, S. *et al.* PLINK: a tool set for whole-genome association and population-based linkage analyses. *Am J Hum Genet* **81**, 559-75 (2007).
8. Winkler, T.W. *et al.* Quality control and conduct of genome-wide association meta-analyses. *Nat Protoc* **9**, 1192-212 (2014).
9. Willer, C.J., Li, Y. & Abecasis, G.R. METAL: fast and efficient meta-analysis of genomewide association scans. *Bioinformatics* **26**, 2190-1 (2010).
10. Yang, J. *et al.* Conditional and joint multiple-SNP analysis of GWAS summary statistics identifies additional variants influencing complex traits. *Nat Genet* **44**, 369-75, S1-3 (2012).
11. Yang, J., Lee, S.H., Goddard, M.E. & Visscher, P.M. GCTA: a tool for genome-wide complex trait analysis. *Am J Hum Genet* **88**, 76-82 (2011).
12. Voight, B.F. *et al.* The metabochip, a custom genotyping array for genetic studies of metabolic, cardiovascular, and anthropometric traits. *PLoS Genet* **8**, e1002793 (2012).
13. Johnson, A.D. *et al.* SNAP: a web-based tool for identification and annotation of proxy SNPs using HapMap. *Bioinformatics* **24**, 2938-9 (2008).
14. Kang, H.M. *et al.* Variance component model to account for sample structure in genome-wide association studies. *Nat Genet* **42**, 348-54 (2010).
15. Abecasis, G.R., Cardon, L.R. & Cookson, W.O. A general test of association for quantitative traits in nuclear families. *Am J Hum Genet* **66**, 279-92 (2000).
16. Xu, Z. & Taylor, J.A. SNPinfo: integrating GWAS and candidate gene information into functional SNP selection for genetic association studies. *Nucleic Acids Res* **37**, W600-5 (2009).
17. Dunham, I. *et al.* An integrated encyclopedia of DNA elements in the human genome. *Nature* **489**, 57-74 (2012).
18. Fehrmann, R.S. *et al.* Trans-eQTLs reveal that independent genetic variants associated with a complex phenotype converge on intermediate genes, with a major role for the HLA. *PLoS Genet* **7**, e1002197 (2011).
19. Nelis, M. *et al.* Genetic structure of Europeans: a view from the North-East. *PLoS One* **4**, e5472 (2009).
20. Westra, H.J. *et al.* MixupMapper: correcting sample mix-ups in genome-wide datasets increases power to detect small genetic effects. *Bioinformatics* **27**, 2104-11 (2011).
21. Westra, H.J. *et al.* Systematic identification of trans eQTLs as putative drivers of known disease associations. *Nat Genet* **45**, 1238-43 (2013).
22. Cvejic, A. *et al.* SMIM1 underlies the Vel blood group and influences red blood cell traits. *Nat Genet* **45**, 542-5 (2013).

23. Croft, D. *et al.* Reactome: a database of reactions, pathways and biological processes. *Nucleic Acids Res* **39**, D691-7 (2011).
24. Raychaudhuri, S. *et al.* Identifying relationships among genomic disease regions: predicting genes at pathogenic SNP associations and rare deletions. *PLoS Genet* **5**, e1000534 (2009).
25. Kanehisa, M., Goto, S., Sato, Y., Furumichi, M. & Tanabe, M. KEGG for integration and interpretation of large-scale molecular data sets. *Nucleic Acids Res* **40**, D109-14 (2012).
26. Bult, C.J. *et al.* Mouse genome informatics in a new age of biological inquiry. in *Proceedings of the IEEE International Symposium on Bio-Informatics and Biomedical Engineering* 29-32 (2000).
27. Lage, K. *et al.* A human phenome-interactome network of protein complexes implicated in genetic disorders. *Nat Biotechnol* **25**, 309-16 (2007).
28. Lui, J.C. *et al.* Synthesizing genome-wide association studies and expression microarray reveals novel genes that act in the human growth plate to modulate height. *Hum Mol Genet* **21**, 5193-201 (2012).
29. Abecasis, G.R. *et al.* An integrated map of genetic variation from 1,092 human genomes. *Nature* **491**, 56-65 (2012).
30. Saito, R. *et al.* A travel guide to Cytoscape plugins. *Nat Methods* **9**, 1069-76 (2012).
31. Smoot, M.E., Ono, K., Ruscheinski, J., Wang, P.L. & Ideker, T. Cytoscape 2.8: new features for data integration and network visualization. *Bioinformatics* **27**, 431-2 (2011).

### 3. Acknowledgements

**Personal grants** – Andrew R Wood and Timothy Frayling are supported by the European Research Council grant: SZ-245 50371-GLUCOSEGENES-FP7-IDEAS-ERC. T.H.P. is supported by The Danish Council for Independent Research Medical Sciences (FSS) and the The Alfred Benzon Foundation. Michael Weedon is supported by the Wellcome Trust Institutional Strategic Support Award (WT097835MF). EKS was supported by NIH K23DK080145, The Doris Duke Foundation, Central Society for Clinical Research, Department of Internal Medicine and BSSP program University of Michigan.

**ACTG (AIDS Clinical Trials Group)** - AIDS Clinical Trials Group data and specimen collection was supported by the following grants: UM1 AI069556,UM1 AI069532,UM1 AI069513,UM1 AI069511,UM1 AI069502,UM1 AI069501,UM1 AI069495,UM1 AI069494,UM1 AI069484,UM1 AI069474,UM1 AI069472,UM1 AI069471,UM1 AI069470,UM1 AI069467,UM1 AI069465,UM1 AI069452,UM1 AI069450,UM1 AI069447,UM1 AI069434,UM1 AI069428,UM1 AI069424,UM1 AI069423,UM1 AI069418,UM1 AI069415,UM1 AI068634,UL1 TR000445,UL1 RR025780,UL1 RR025777,UL1 RR025747,UL1 RR024996,UL1 RR024160,UL1 RR024156,U01 AI046376,U01 AI046376,U01 AI046370,U01 AI038858,U01 AI068636,UM1 AI069432,U01 AI038858,U01 AI038855,U01 AI034853,U01 AI032782,U01 AI032782,U01 AI032782,U01 AI027675,UM1 AI069477,U01 AI027666,U01 AI027661,U01 AI027658,U01 AI025868,U01 AI025859,U01 AI025859,P30 AI073961,P30 AI054999,R01 AI077505,UM1 AI069439,P30 AI050410,P30 AI050409,P30 AI045008,K24 AI051966,UM1 AI069419,K01 AI062435

**ADVANCE (Atherosclerotic Disease, Vascular Function, and Genetic Epidemiology)** - The ADVANCE study was supported by a grant from the Reynold's Foundation and NHLBI grant HL087647.

**AGES (Age, Gene/Environment Susceptibility Reykjavik Study)** - The Age, Gene/Environment Susceptibility Reykjavik Study has been funded by NIH contract N01-AG-12100, the NIA Intramural Research Program, Hjartavernd (the Icelandic Heart Association), and the Althingi (the Icelandic Parliament). The study is approved by the Icelandic National Bioethics Committee, (VSN: 00-063) and the Data Protection Authority. The researchers are indebted to the participants for their willingness to participate in the study.

**AMC-PASAMC-PAS** - AMC-PASAMC-PAS is grateful to M.D. Trip MD, PhD and S. Sivapalaratnam MD for their input in collecting the data. This work was funded by the Wellcome Trust (core grant 098051). We like to thank the members of the Wellcome Trust Sanger Institute Genotyping Facility.

**ARIC (Atherosclerosis Risk in Communities Study) - GWAS:** The Atherosclerosis Risk in Communities Study is carried out as a collaborative study supported by National Heart, Lung, and Blood Institute contracts (HHSN268201100005C, HHSN268201100006C, HHSN268201100007C, HHSN268201100008C, HHSN268201100009C, HHSN268201100010C, HHSN268201100011C, and HHSN268201100012C), R01HL087641, R01HL59367 and R01HL086694; National Human Genome Research Institute contract U01HG004402; and National Institutes of Health contract HHSN268200625226C. The authors thank the staff and participants of the ARIC study for their important contributions. Infrastructure was partly supported by Grant Number UL1RR025005, a component of the National Institutes of Health and NIH Roadmap for Medical Research. **MetaboChip:** The Population Architecture Using Genomics and Epidemiology (PAGE) program is funded by the National Human Genome Research Institute (NHGRI), supported by U01HG004803 (CALiCo), U01HG004798 (EAGLE), U01HG004802 (MEC), U01HG004790 (WHI), and U01HG004801 (Coordinating Center), and their respective NHGRI ARRA supplements. The contents of this paper are solely the responsibility of the authors and do not necessarily represent the official views of the NIH. The complete list of PAGE members can be found at <http://www.pagestudy.org>. The data and materials included in this report result from a collaboration between the following studies: The Multiethnic Cohort study (MEC) characterization of epidemiological architecture is funded through the NHGRI PAGE program (U01HG004802 and its NHGRI ARRA supplement). The MEC study is funded through the National Cancer Institute (R37CA54281, R01 CA63, P01CA33619, U01CA136792, and U01CA98758); Funding support for the "Epidemiology of putative genetic variants: The Women's Health Initiative" study is provided through the NHGRI PAGE program (U01HG004790 and its NHGRI ARRA supplement). The WHI program is funded by the National Heart, Lung, and Blood Institute; NIH; and U.S. Department of Health and Human Services through contracts N01WH22110, 24152, 32100-2, 32105-6, 32108-9, 32111-13, 32115, 32118-32119, 32122, 42107-26, 42129-32, and 44221. The authors thank the WHI investigators and staff for their dedication, and the study participants for making the program possible. A full listing of WHI investigators can be found at: [http://www.whiscience.org/publications/WHI\\_investigators\\_shortlist.pdf](http://www.whiscience.org/publications/WHI_investigators_shortlist.pdf); Funding support for the Genetic Epidemiology of Causal Variants Across the Life Course (CALiCo) program was provided through the NHGRI PAGE program (U01HG004803 and its NHGRI ARRA supplement). The following studies contributed to this manuscript and are funded by the following agencies: The Atherosclerosis Risk in Communities (ARIC) Study is carried out as a collaborative study supported by National Heart, Lung, and Blood Institute contracts N01-HC-55015, N01-HC-55016, N01-HC-55018, N01-HC-55019, N01-HC-55020, N01-HC-55021, N01-HC-55022. Assistance with phenotype harmonization, SNP selection and annotation, data cleaning, data management, integration and dissemination, and general study coordination was provided by the PAGE Coordinating Center

(U01HG004801-01 and its NHGRI ARRA supplement). The National Institutes of Mental Health also contributes to the support for the Coordinating Center. The PAGE consortium thanks the staff and participants of all PAGE studies for their important contributions. Dr. North is also funded by the National Heart, Lung, and Blood Institute grant R01 – DK089256.

**ASCOT (Anglo-Scandinavian Cardiac Outcomes Trial)** - This work was supported by Pfizer, New York, NY, USA, for the ASCOT study and the collection of the ASCOT DNA repository; by Servier Research Group, Paris, France; and by Leo Laboratories, Copenhagen, Denmark. We thank all ASCOT trial participants, physicians, nurses, and practices in the participating countries for their important contribution to the study. In particular we thank Clare Muckian and David Toomey for their help in DNA extraction, storage, and handling.

**AE (Athero-Express Biobank Study)** - Genotyping was funded by Cavadis B.V. Sander W. Van der Laan is funded through grants from the Interuniversity Cardiology Institute of the Netherlands (ICIN, 09.001) and CVON (GENIUS). Folkert W. Asselbergs is supported by a clinical fellowship from the Netherlands Organisation for Health Research and Development (ZonMw grant 90700342). Claudia Tersteeg, Krista den Ouden, Mirjam B. Smeets, and Loes B. Collé are graciously acknowledged for their work on the DNA extraction. Astrid E.M.W. Willems, Evelyn Velema, Kristy M. J. Vons, Sara Bregman, Timo R. ten Brinke, Sara van Laar, Louise M. Catanzariti, Joyce E.P. Vrijenhoek, Sander M. van de Weg, Arjan H. Schoneveld, Petra H. Homoed-van der Kraak, and Aryan Vink are graciously acknowledged for their past and continuing work on the Athero-Express Biobank Study. We would also like to thank all the (former) employees involved in the Athero-Express Biobank Study of the Departments of Surgery of the St. Antonius Hospital Nieuwegein and University Medical Center Utrecht for their continuing work. Jessica van Setten is graciously acknowledged for her help in the quality assurance and quality control of the genotype data. We graciously thank the team of Golden Helix Inc. especially Autumn Laughbaum, Bryce Christensen, Christophe Lambert, Greta Linse Peterson, and Gabe Rudy for their continuing support in data analysis. Lastly, we would like to thank all participants of the Athero-Express Biobank Study; without you these kinds of studies would not be possible

**B58C (British 1958 Birth Cohort)** - Data collection was funded by MRC grant G0000934 and cell-line creation by Wellcome Trust grant 068545/Z/02. Great Ormond Street Hospital/University College London, Institute of Child Health and Oxford Biomedical Research Centre, University of Oxford receive a proportion of funding from the Department of Health's National Institute for Health Research (NIHR) ('Biomedical Research Centres' funding). This paper presents independent research and the views expressed are those of the author(s) and not necessarily those of the NHS, the NIHR, or the Department of Health. The B58C-T1DGC genotyping utilized resources provided by the Type 1 Diabetes Genetics Consortium, a collaborative clinical study sponsored by the National Institute of Diabetes and Digestive and Kidney Diseases (NIDDK), National Institute of Allergy and Infectious Diseases (NIAID), National Human Genome Research Institute (NHGRI), National Institute of Child Health and Human Development (NICHD), and Juvenile Diabetes Research Foundation International (JDRF) and supported by U01 DK062418. B58C-T1DGC GWAS data were deposited by the Diabetes and Inflammation Laboratory, Cambridge Institute for Medical Research (CIMR), University of Cambridge, which is funded by Juvenile Diabetes Research Foundation International, the Wellcome Trust and the National Institute for Health Research Cambridge Biomedical Research Centre; the CIMR is in receipt of a Wellcome Trust Strategic Award (079895). The B58C-GABRIEL genotyping was supported by a contract from the European Commission Framework Programme 6 (018996) and grants from the French Ministry of Research

**BHS (Busselton Health Study)** - The Busselton Health Study (BHS) acknowledges the generous support for the 1994/5 follow-up study from Healthway, Western Australia and the numerous Busselton community volunteers who assisted with data collection and the study participants from the Shire of Busselton. The Busselton Health Study is supported by The Great Wine Estates of the Margaret River region of Western Australia.

**BLSA (Baltimore Longitudinal Study of Aging)** - The BLSA was supported by the Intramural Research Program of the NIH, National Institute on Aging.

**B-PROOF (B-vitamins for the PRevention Of Osteoporotic Fractures study)** - The B-PROOF group acknowledges the indispensable assistance of all collaborators and participants of the trial. The B-PROOF trial is supported by The Netherlands Organization for Health Research and Development (ZonMw, Grant 6130.0031), the Hague; unrestricted grant from NZO (Dutch Dairy Association), Zoetermeer; Orthica, Almere; NCHA (Netherlands Consortium Healthy Ageing) Leiden/Rotterdam; Ministry of Economic Affairs, Agriculture and Innovation (project KB-15-004-003), the Hague; Wageningen University, Wageningen; VUmc, Amsterdam; Erasmus Medical Center, Rotterdam; Unilever, Colworth, UK.

**BRIGHT (British Genetics of Hypertension study)** - This work was supported by the Medical Research Council of Great Britain (grant number G9521010D); and by the British Heart Foundation (grant number PG/02/128). A.F.D. was supported by the British Heart Foundation (grant numbers RG/07/005/23633, SP/08/005/25115); and by the European Union Ingenious HyperCare Consortium: Integrated Genomics, Clinical Research, and Care in Hypertension (grant number LSHM-C7-2006-037093). The BRIGHT study is extremely grateful to all the patients who participated in the study and the BRIGHT nursing team. We would also like to thank the Barts Genome Centre staff for their assistance with this project. This work forms part of the research themes contributing to the

translational research portfolio for Barts and the London Cardiovascular Biomedical Research Unit, which is supported and funded by the National Institute for Health Research. This work was facilitated by the National Institute for Research Biomedical Research Unit at Barts and MRC Programme 952010.

**CAPS (Cancer of the Prostate in Sweden study)** - The CAPS study was supported by grants from the Swedish Research Council, the Swedish Cancer Society, and the National Cancer Institute. E.I. was supported by grants from the Swedish Research Council, the Swedish Heart-Lung Foundation, the Swedish Society of Medicine, the Swedish Foundation for Strategic Research, and the Royal Swedish Academy of Science while working with this article.

**CARDIOGENICS (a study examining the genetics of cardiovascular disease)** - Sample collection in the Cardiogenics Consortium (<http://www.cardiogenics.eu/web/>) was funded by the 6th Framework Program of the European Union (LSHM-CT-2006-037593) and supported through the Cambridge Bioresource which is funded by the NIHR Cambridge Biomedical research Centre. We thank all the participants and clinicians involved in the recruitment process at Cambridge and Leicester (UK), Luebeck and Regensburg (Germany), and Paris (France). This work was funded by the Wellcome Trust (core grant 098051). We like to thank the members of the Wellcome Trust Sanger Institute Genotyping Facility.

**CoLaus (Cohorte Lausannoise)** - The CoLaus study was supported by research grants from the Swiss National Science Foundation (grant no: 33CSCO-122661) from GlaxoSmithKline and the Faculty of Biology and Medicine of Lausanne, Switzerland. The authors also express their gratitude to the participants in the Lausanne CoLaus study and to the investigators who have contributed to the recruitment, in particular the co PIs, Peter Vollenweider, Gérard Waeber, Vincent Moser, Dawn Waterworth and research nurses of CoLaus: Yolande Barreau, Anne-Lise Bastian, Binasa Ramic, Martine Moranville, Martine Baumer, Marcy Sagette, Jeanne Ecoffey, Sylvie Mermoud.

**COROGENE (Genetic Predisposition of Coronary Heart Disease in Patients Verified with Coronary Angiogram)** The study was supported by grants from Aarne Koskelo Foundation, Helsinki University Central Hospital special government funds (EVO #TYH2012209), and Finnish Foundation for Cardiovascular research. MP was partly financially supported for this work by the Finnish Academy SALVE program "Pubgensense" 129322 and by grants from the Finnish Foundation for Cardiovascular Research.

**CROATIA-Vis** - The CROATIA-Vis study in the Croatian island of Vis was supported through the grants from the Medical Research Council UK to H.C., A.F.W. and I.R.; and Ministry of Science, Education and Sport of the Republic of Croatia to I.R. (number 108-1080315-0302) and the European Union framework program 6 EUROSPAN project (contract no. LSHG-CT-2006-018947). We would like to acknowledge the invaluable contributions of the recruitment team (including those from the Institute of Anthropological Research in Zagreb) in Vis, the administrative teams in Croatia and Edinburgh and the people of Vis.

**deCODE** - We thank participants in deCODE cardiovascular- and obesity studies and collaborators for their cooperation. The research performed at deCODE Genetics was part funded through the European Community's Seventh Framework Programme (FP7/2007-2013), ENGAGE project, grant agreement HEALTH-F4-2007-201413.

**DESIR (Data from an Epidemiological Study on the Insulin Resistance syndrome study)** - This study was supported in part by grants from SFD ("Société Francophone du Diabète"), CPER ("Contrat de Projets État-Région"), and ANR ("Agence Nationale de la Recherche"). The DESIR study has been supported by INSERM-CNAMTS ("Caisse Nationale de l'Assurance Maladie des Travailleurs Salariés"), Lilly, Novartis Pharma, sanofi-aventis, INSERM ("Réseaux en Santé Publique, Interactions entre les déterminants de la santé"), "Association Diabète Risque Vasculaire", "Fédération Française de Cardiologie", "Fondation de France", Onivins, Ardix Medical, Bayer Diagnostics, Becton Dickinson, Cardionics, Merck Santé, Novo Nordisk, Pierre Fabre, Roche, and Topcon.

**DGI (Diabetes Genetics Initiative)** - The Botnia (DGI) study have been supported by grants from Folkhälsan Research Foundation, Sigrd Juselius Foundation, Ministry of Education, Nordic Center of Excellence in Disease Genetics, Gyllenberg Foundation, Swedish Cultural Foundation in Finland, Finnish Diabetes Research Foundation, Foundation for Life and Health in Finland, Finnish Medical Society, Paavo Nurmi Foundation, Perklén Foundation, Ollqvist Foundation, Närpes Health Care Foundation, the Municipal Health Care Center and Hospital in Jakobstad, Health Care Centers in Vasa, Närpes and Korsholm. This work was also partially supported by NIH grant R01-DK075787 to JNH

**DIAGEN (DIAbetes GENetic Study)** - The DIAGEN study was supported by the Commission of the European Communities, Directorate C - Public Health and Risk Assessment, Health & Consumer Protection, Grant Agreement number - 2004310 and by the Dresden University of Technology Funding Grant, Med Drive. We are grateful to all of the patients who cooperated in this study and to their referring physicians and diabetologists in Saxony.



**DILGOM (Dietary, life style, and genetic determinants of obesity and metabolic syndrome)** - The DILGOM project and this work is supported by the Academy of Finland (grant numbers 136895, 263836, 250207, 139635, 118065), the Orion-Farmos Research Foundation, and the Finnish Foundation for Cardiovascular Research. MP is partly financially supported for this work by the Finnish Academy SALVE program "Pubgensense" 129322. We are grateful for the THL DNA laboratory for its skilful work to produce the DNA samples used in this study.

**DNBC (Danish National Birth Cohort, Preterm Delivery Study)** - Funding support for the Danish National Birth Cohort (DNBC) was provided by the Danish National Research Foundation, the Danish Pharmacists' Fund, the Egmont Foundation, the March of Dimes Birth Defects Foundation, the Augustinus Foundation and the Health Fund of the Danish Health Insurance Societies. The generation of GWAS genotype data for the DNBC samples was carried out within the GENEVA consortium with funding provided through the NIH Genes, Environment and Health Initiative (GEI) (U01HG004423). Assistance with phenotype harmonization and genotype cleaning, as well as with general study coordination, was provided by the GENEVA Coordinating Center (U01HG004446). Genotyping was performed at Johns Hopkins University Center for Inherited Disease Research, with support from the NIH GEI (U01HG004438).

**DPS (Diabetes Prevention Study)** - The DPS has been financially supported by grants from the Academy of Finland (117844 and 40758, 211497, and 118590; The EVO funding of the Kuopio University Hospital from Ministry of Health and Social Affairs (5254), Finnish Funding Agency for Technology and Innovation (40058/07), Nordic Centre of Excellence on Systems biology in controlled dietary interventions and cohort studies, SYSDIET (070014), The Finnish Diabetes Research Foundation, Yrjö Jahnsson Foundation (56358), Sigrid Juselius Foundation, Juho Vainio Foundation and TEKES grants 70103/06 and 40058/07.

**DR's EXTRA (Dose Response to Exercise Training study)** - The DR's EXTRA Study was supported by the Ministry of Education and Culture of Finland (627;2004-2011), Academy of Finland (102318; 123885), Kuopio University Hospital, Finnish Diabetes Association, Finnish Foundations for Cardiovascular Research, Päivikki and Sakari Sohlberg Foundation, by European Commission FP6 Integrated Project (EXGENESIS); LSHM-CT-2004-005272, City of Kuopio and Social Insurance Institution of Finland (4/26/2010).

**DUNDEE (GoDARTS)**- We acknowledge the support of the Health Informatics Centre, University of Dundee for managing and supplying the anonymised data and NHS Tayside, the original data owner. We are grateful to all the participants who took part in the Go-DARTS study, to the general practitioners, to the Scottish School of Primary Care for their help in recruiting the participants, and to the whole team, which includes interviewers, computer and laboratory technicians, clerical workers, research scientists, volunteers, managers, receptionists, and nurses.

**EAS (Edinburgh Artery Study)** - The Edinburgh Artery Study (EAS) was funded by the British Heart Foundation (RG/98002). Genotyping was funded by a project grant from the Chief Scientist Office, Scotland (CZB/4/672), and undertaken at the Wellcome Trust Clinical Research Facility in Edinburgh.

**EGCUT (Estonian Genome Center of the University of Tartu) (GWAS + MetaboChip)** - EGCUT received targeted financing from Estonian Government SF0180142s08, Center of Excellence in Genomics (EXCEGEN) and University of Tartu (SP1GVARENG). We acknowledge EGCUT technical personnel, especially Mr V. Soo and S. Smit. Data analyzes were carried out in part in the High Performance Computing Center of University of Tartu.

**Ely Study** - We are grateful to all the volunteers and to the staff of St. Mary's Street Surgery, Ely and the study team. The Ely Study was funded by the MRC (MC\_U106179471) and Diabetes UK. Genotyping in the Ely and Fenland studies was supported in part by an MRC-GlaxoSmithKline pilot programme grant (G0701863).

**eMERGE (Electronic Medical Records and Genomics Network)** - We thank eMERGE Consortium members Jennifer Loren Armstrong, Arun Muthalagu, Allen Pacheco, and Laura Jarmila Rasmussen-Torvik for their assistance with data preparation and analysis. This work was funded by NIH grants U01HG004609, U01HG04603, and UL1RR025741.

**EMIL-SWABIA (Echinococcus Multilocularis and Internal Diseases in Leutkirch (EMIL) study)** - Centre of Excellence Baden-Wuerttemberg "Metabolic Disorders" to BOB - REQUIRES CLARIFICATION FOR INCLUSION

**EPIC** - The EPIC Norfolk diabetes case cohort study is nested within the EPIC Norfolk Study, which is supported by programme grants from the Medical Research Council, and Cancer Research UK and with additional support from the European Union, Stroke Association, British Heart Foundation, Research into Ageing, Department of Health, The Wellcome Trust and the Food Standards Agency. Genotyping was in part supported by the MRC-GSK pilot programme grant. We acknowledge the contribution of the staff and participants of the EPIC-Norfolk Study. The EPIC Norfolk study is supported by programme grants from the Medical Research Council, and Cancer Research UK. We acknowledge the contribution of the staff and participants of the EPIC-Norfolk Study.

**ERF - Erasmus Rucphen Family (EUROSPAN)** - ERF study as a part of EUROSPAN (European Special Populations Research Network) was supported by European Commission FP6 STRP grant number 018947 (LSHG-CT-2006-01947) and also received funding from the European Community's Seventh Framework Programme (FP7/2007-2013)/grant agreement HEALTH-F4-2007-201413 by the European Commission under the programme "Quality of Life and Management of the Living Resources" of 5th Framework Programme (no. QL62-CT-2002-01254). High-throughput analysis of the ERF data was supported by joint grant from Netherlands Organisation for Scientific Research and the Russian Foundation for Basic Research (NWO-RFBR 047.017.043). We are grateful to all study participants and their relatives, general practitioners and neurologists for their contributions and to P. Veraart for her help in genealogy, J. Vergeer for the supervision of the laboratory work and P. Snijders for his help in data collection.

**FamHS (Family Heart Study)** - The Family Heart Study was supported by the by grants R01-HL-087700, and R01-HL-088215 from the National Heart, Lung, and Blood Institute.

**FENLAND (Fenland Study)**- The Fenland Study is funded by the Wellcome Trust and the Medical Research Council (MC\_U106179471). We are grateful to all the volunteers for their time and help, and to the General Practitioners and practice staff for assistance with recruitment. We thank the Fenland Study Investigators, Fenland Study Co-ordination team and the Epidemiology Field, Data and Laboratory teams.

**FIN-D2D 2007 (National type 2 diabetes prevention programme in Finland)** - The FIN-D2D study has been financially supported by the hospital districts of Pirkanmaa, South Ostrobothnia, and Central Finland, the Finnish National Public Health Institute (current National Institute for Health and Welfare), the Finnish Diabetes Association, the Ministry of Social Affairs and Health in Finland, the Academy of Finland (grant number 129293), Commission of the European Communities, Directorate C-Public Health (grant agreement no. 2004310) and Finland's Slottery Machine Association.

**FINGESTURE** - We thank the study participants. We also thank Kari Kaikkonen, Marja-Leena Kortelainen, and Heikki Huikiri for study concept and design, and data acquisition and interpretation. The FinGesture cohort is supported by the Juselius Foundation (Helsinki, Finland) and the Council of Health of the Academy of Finland (Helsinki, Finland). Authors would like to thank Philippe Goyette, Sylvain Foisy, Gabrielle Boucher, Guillaume Lettre and John D. Rioux for their contributions to the design, implementation and analysis of the GWA study of the FinGesture cohort. In addition, we would like to acknowledge the support of the Montreal Heart Institute Foundation.

**FTC (Finnish Twin Cohort)** - ENGAGE – European Network for Genetic and Genomic Epidemiology, FP7-HEALTH-F4-2007, grant agreement number 201413; Academy of Finland (265240, 263278)

**FRAM (Framingham Heart Study)** - This research was conducted in part using data and resources from the Framingham Heart Study of the National Heart Lung and Blood Institute of the National Institutes of Health and Boston University School of Medicine. The analyses reflect intellectual input and resource development from the Framingham Heart Study investigators participating in the SNP Health Association Resource (SHARe) project. This work was partially supported by the National Heart, Lung and Blood Institute's Framingham Heart Study (Contract No. N01-HC-25195) and its contract with Affymetrix, Inc for genotyping services (Contract No. N02-HL-6-4278). A portion of this research utilized the Linux Cluster for Genetic Analysis (LinGA-II) funded by the Robert Dawson Evans Endowment of the Department of Medicine at Boston University School of Medicine and Boston Medical Center.

**FUSION (Finland-United States Investigation of NIDDM Genetics) Stage 1+2 GWAS cases and controls** - Support for FUSION was provided by NIH grants R01-DK062370 (to M.B.), R01-DK072193 (to K.L.M.), and intramural project number 1Z01-HG000024 (to F.S.C.). Genome-wide genotyping was conducted by the Johns Hopkins University Genetic Resources Core Facility SNP Center at the Center for Inherited Disease Research (CIDR), with support from CIDR NIH contract no. N01-HG-65403.

**GerMIFS I and II (German Myocardial Infarction Family Study I & II)** - The German MI Family Studies (GerMIFS I-II) were supported by the Deutsche Forschungsgemeinschaft and the German Federal Ministry of Education and Research (BMBF) in the context of the German National Genome Research Network (NGFN-2 and NGFN-plus), the EU funded integrated projects Cardiogenics (LSHM-CT-2006-037593) and ENGAGE, and the bi-national BMBF/ANR funded project CARDomics (01KU0908A).

**GLACIER (Gene-Lifestyle interactions And Complex traits Involved in Elevated disease Risk Study)** - The GLACIER Study was funded by grants from the Swedish Diabetes Association, Swedish Heart-Lung Foundation, Swedish Research Council, Medical Research Foundation of Umeå University, and Novo Nordisk (all to PWF). We thank the participants for their outstanding contributions to the GLACIER Study. We also thank the staff of the Umeå Medical Biobank, especially Åsa Agren, John Huttilainen, and Ann-Marie Ahren for data retrieval and organisation and Kerstin Enquist and Tore Johansson for expert assistance with DNA extraction and plating. The GLACIER Study is nested within the Västerbottens Intervention Project (VIP); we thank the staff of the VIP Study for phenotype data collection, particularly Lars Wennehall who leads the VIP Study. Inês Barroso acknowledges

funding from the Wellcome Trust grant WT098051, United Kingdom NIHR Cambridge Biomedical Research Centre and the MRC Centre for Obesity and Related Metabolic Diseases. We would like to thank Emma Gray, Douglas Simpkin, Sarah Hunt and staff of the WTSI Sample Logistics, Genotyping and Variation Informatics Facilities. The authors would like to thank Sarah Edkins, Douglas Simpkin and staff of the WTSI genotyping facility.

**GOOD (Gothenburg Osteoporosis and Obesity Determinants Study)** - Financial support was received from the Swedish Research Council, the Swedish Foundation for Strategic Research, the ALF/LUA research grant in Gothenburg, the Lundberg Foundation, the Torsten and Ragnar Söderberg's Foundation, the Novo Nordisk Foundation, and the European Commission grant HEALTH-F2-2008-201865-GEFOS.

**UMCGroningen (Fehrmann eQTL Study)** - This study was supported by grants from the Celiac Disease Consortium (an innovative cluster approved by the Netherlands Genomics Initiative and partly funded by the Dutch Government (grant BSIK03009), the Netherlands Organization for Scientific Research (NWO-VICI grant 918.66.620, NWO-VENI grant 916.10.135 to L.F.), the Dutch Digestive Disease Foundation (MLDS WO11-30), and a Horizon Breakthrough grant from the Netherlands Genomics Initiative (grant 92519031 to L.F.). This project was supported by the Prinses Beatrix Fonds, VSB fonds, H. Kersten and M. Kersten (Kersten Foundation), The Netherlands ALS Foundation, and J.R. van Dijk and the Adessium Foundation. The research leading to these results has received funding from the European Community's Health Seventh Framework Programme (FP7/2007-2013) under grant agreement 259867.

**H2000 GENMETS Sub Sample (Health 2000: Health and Functional Capacity of Finns) - a national health survey)** - We would like to thank all H2000 cohort participants. The Health 2000 Study was funded by the National Institute for Health and Welfare (THL), the Finnish Centre for Pensions (ETK), the Social Insurance Institution of Finland (KELA), the Local Government Pensions Institution (KEVA) and other organizations listed on the website of the survey (<http://www.terveys2000.fi>). We also want to thank the Sanger Institute for genotyping the GenMets subcohort

**HBCS (Helsinki Birth Cohort Study)** We thank all study participants as well as everybody involved in the Helsinki Birth Cohort Study. Helsinki Birth Cohort Study has been supported by grants from the Academy of Finland, the Finnish Diabetes Research Society, Folkhälsan Research Foundation, Novo Nordisk Foundation, Finska Läkaresällskapet, Signe and Ane Gyllenberg Foundation, Ahokas Foundation, Emil Aaltonen Foundation, Juho Vainio Foundation, and Wellcome Trust (grant number WT089062).

**Health ABC (Dynamics of Health, Aging, and Body Composition)** - The Health ABC Study was supported by NIA contracts N01AG62101, N01AG62103, and N01AG62106 and, in part, by the NIA Intramural Research Program. The genome-wide association study was funded by NIA grant 1R01AG032098-01A1 to Wake Forest University Health Sciences and genotyping services were provided by the Center for Inherited Disease Research (CIDR). CIDR is fully funded through a federal contract from the National Institutes of Health to The Johns Hopkins University, contract number HHSN268200782096C. This study utilized the high-performance computational capabilities of the Biowulf Linux cluster at the National Institutes of Health, Bethesda, Md. (<http://biowulf.nih.gov>).

**HERITAGE (HEalth, Risk factors, exercise Training And Genetics) Family Study** - The HERITAGE Family Study has been funded by National Heart, Lung, and Blood Institute grants HL-45670, HL-47323, HL-47317, HL-47327, and HL-47321 (to C. Bouchard, T. Rankinen, D.C. Rao, Arthur Leon, James Skinner, and Jack Wilmore). Thanks are expressed to Drs. Arthur Leon, James Skinner, and Jack Wilmore for their contributions to the data collection. C. Bouchard is partially funded by the John W. Barton, Sr. Chair in Genetics and Nutrition. We thank Ms. Jessica Watkins and Ms. Kathryn Cooper for their expert contributions to GWAS and replication genotyping and DNA bank maintenance.

**HNR (Heinz Nixdorf Recall Study)** - We thank the Heinz Nixdorf Foundation, Germany, for the generous support of this study. We acknowledge the support of the Sarstedt AG & Co. (Nümbrecht, Germany) concerning laboratory equipment. We are grateful to Prof. Karl-Heinz Joekel (Institute for Medical Informatics, Biometry and Epidemiology (IMIBE), University Hospital Essen, Essen, Germany) and Prof. Dirk Schadendorf (Clinic Department of Dermatology, University Hospital Essen, Essen, Germany) for funding this study.

**HUNT2 (Nord-Trøndelag Health Study)** - The Nord-Trøndelag Health Study (The HUNT Study) is a collaboration between HUNT Research Centre (Faculty of Medicine, Norwegian University of Science and Technology NTNU), Nord-Trøndelag County Council, Central Norway Health Authority, and the Norwegian Institute of Public Health.

**HyperGen/HyperGenes (Hypertension Genetic Epidemiology Network)** - **HyperGen:** The Hypertension Genetic Epidemiology Network is funded by cooperative agreements (U10) with NHLBI: HL54471, HL54472, HL54473, HL54495, HL54496, HL54497, HL54509, HL54515 and by R01 HL55673. **Hypergenes:** funding: (FP7 - HEALTH-F4-2007-201550); INTEROMICS (MIUR - CNR Italian Flagship Project).

**IMPROVE** - Supported by the European Commission (LSHM-CT- 2007- 037273), the Swedish Heart-Lung Foundation, the Swedish Research Council (8691), the Knut and Alice Wallenberg Foundation, the Foundation for Strategic Research, the Torsten and Ragnar Söderberg Foundation, the Strategic Cardiovascular Programme of Karolinska Institutet and the Stockholm County Council and the Stockholm County Council (560183).

**InCHIANTI** - The InCHIANTI study baseline (1998-2000) was supported as a "targeted project" (ICS110.1/RF97.71) by the Italian Ministry of Health and in part by the U.S. National Institute on Aging (Contracts: 263 MD 9164 and 263 MD 821336); the InCHIANTI Follow-up 1 (2001-2003) was funded by the U.S. National Institute on Aging (Contracts: N.1-AG-1-1 and N.1-AG-1-2111)

**IPM (Institute for Personalized Medicine) Biobank Project** - The Mount Sinai Biobank Program is supported by The Andrea and Charles Bronfman Philanthropies.

**KORA Studies (Cooperative Health Research in the Region of Augsburg, Kooperative Gesundheitsforschung in der Region Augsburg)** - The KORA research platform was initiated and financed by the Helmholtz Zentrum München - German Research Center for Environmental Health, which is funded by the German Federal Ministry of Education and Research (BMBF) and by the State of Bavaria. Furthermore, KORA research was supported within the Munich Center of Health Sciences (MC Health), Ludwig-Maximilians-Universität, as part of LMUinnovativ. Part of this project was supported by BMBF grant number 01GS0823.

**Leipzig Study** - This work was supported by grants from the German Research Council (SFB- 1052 "Obesity mechanisms"), from the German Diabetes Association and from the DHFD (Diabetes Hilfs- und Forschungsfonds Deutschland). Peter Kovacs is funded by the Boehringer Ingelheim Foundation. IFB AdiposityDiseases is supported by the Federal Ministry of Education and Research (BMBF), Germany, FKZ: 01EO1001. This work was further supported by the Kompetenznetz Adipositas (Competence network for Obesity) funded by the Federal Ministry of Education and Research (German Obesity Biomaterial Bank; FKZ 01GI1128). Inga Prokopenko was funded in part through the European Community's Seventh Framework Programme (FP7/2007-2013), ENGAGE project, grant agreement HEALTH-F4-2007-201413.

**LifeLines** - The LifeLines Cohort Study, and generation and management of GWAS genotype data for the LifeLines Cohort Study is supported by the Netherlands Organization of Scientific Research NWO (grant 175.010.2007.006), the Economic Structure Enhancing Fund (FES) of the Dutch government, the Ministry of Economic Affairs, the Ministry of Education, Culture and Science, the Ministry for Health, Welfare and Sports, the Northern Netherlands Collaboration of Provinces (SNN), the Province of Groningen, University Medical Center Groningen, the University of Groningen, Dutch Kidney Foundation and Dutch Diabetes Research Foundation. We thank Behrooz Alizadeh, Annemieke Boesjes, Marcel Bruinenberg, Noortje Festen, Pim van der Harst, Ilja Nolte, Lude Franke, Mitra Valimohammadi for their help in creating the GWAS database, and Rob Bieringa, Joost Keers, René Oostergo, Rosalie Visser, Judith Vonk for their work related to data-collection and validation. The authors are grateful to the study participants, the staff from the LifeLines Cohort Study and Medical Biobank Northern Netherlands, and the participating general practitioners and pharmacists.

**LLS (Leiden Longevity Study)** - The research leading to these results has received funding from the European Union's Seventh Framework Programme (FP7/2007-2011) under grant agreement number 259679. This study was financially supported by the Innovation-Oriented Research Program on Genomics (SenterNovem IGE05007), the Centre for Medical Systems Biology and the Netherlands Consortium for Healthy Ageing (grant 050-060-810), all in the framework of the Netherlands Genomics Initiative, Netherlands Organization for Scientific Research (NWO), by Unilever Colworth and by BBMRI-NL, a Research Infrastructure financed by the Dutch government (NWO 184.021.007).

**LOLIPOP (London Life Sciences Prospective Population Study)** - The LOLIPOP study is supported by the National Institute for Health Research (NIHR) Comprehensive Biomedical Research Centre Imperial College Healthcare NHS Trust, the NIHR Cardiovascular Biomedical Research Unit of Royal Brompton and Harefield NHS Foundation Trust, the British Heart Foundation (SP/04/002), the Medical Research Council (G0601966, G0700931), the Wellcome Trust (084723/Z/08/Z) the NIHR (RP-PG-0407-10371), European Union FP7 (EpiMigrant, 279143) and Action on Hearing Loss (G51). We thank the participants and research staff who made the study possible.

**LURIC (The Ludwigshafen Risk and Cardiovascular Health) Study** - We extend our appreciation to the participants of the LURIC study; without their collaboration, this article would not have been written. We thank the LURIC study team who were either temporarily or permanently involved in patient recruitment as well as sample and data handling, in addition to the laboratory staff at the Ludwigshafen General Hospital and the Universities of Freiburg and Ulm, Germany. LURIC has received funding from the 6th Framework Program (integrated project Bloodomics, grant LSHM-CT-2004-503485) and from the 7th Framework Program (Atheroremo, grant agreement number 201668 and RiskyCAD, grant agreement number 305739) of the European Union.

**METSIM (METabolic Syndrome In Men)** - The METSIM study was funded by the Academy of Finland (grants no. 77299 and 124243).

**MGS (Molecular Genetics of Schizophrenia)** - The Molecular Genetics of Schizophrenia project was carried out by 10 research sites and PIs: Pablo V. Gejman, Study Coordinator (Department of Psychiatry and Behavioral Sciences, NorthShore University HealthSystem, Evanston, IL, and Department of Psychiatry and Behavioral Sciences, University of Chicago, Chicago, IL), Douglas F. Levinson (Stanford University), Bryan J. Mowry (University of Queensland), Donald Black (University of Iowa), Robert Freedman (University of Colorado), C. Robert Cloninger (Washington University), Jeremy Silverman (Mt. Sinai Medical School), Nancy Buccola (Louisiana State University - New Orleans), William Byerley (University of California at San Francisco), and Farooq Amin (Emory University). This study was supported by NIH R01 grants (MH67257 to N.G.B., MH59588 to B.J.M., MH59571 to P.V.G., MH59565 to R.F., MH59587 to F.A., MH60870 to W.F.B., MH59566 to D.W.B., MH59586 to J.M.S., MH61675 to D.F.L., MH60879 to C.R.C., and MH81800 to P.V.G.), NIH U01 grants (MH79469 to P.V.G., and MH79470 to D.F.L.), NARSAD (National Alliance for Research on Schizophrenia and Depression) Young Investigator Awards (to J.D. and A.R.S.), the Genetic Association Information Network (GAIN), the Walter E. Nichols, M.D., and Eleanor Nichols endowments, at Stanford University, and by The Paul Michael Donovan Charitable Foundation. Genotyping was carried out by the Genotyping and Analysis at the Broad Institute of Harvard and MIT (S. Gabriel and D.B.M.), which is supported by grant U54 RR020278 from the National Center for Research Resources. Genotyping of half of the control sample presented here was carried out with support from GAIN. The GAIN quality control team (G.R. Abecasis and J. Paschall) made important contributions to the project. The statistical analysis team was coordinated by Douglas F. Levinson (Stanford University) and included Jianxin Shi (National Cancer Institute), Frank Dudbridge (London School of Hygiene and Tropical Medicine), Peter Holmans (Cardiff University) and Itsik Pe'er (Columbia University).

**MICROS (Microisolates in South Tyrol Study) (EUROSPAN)** - In South Tyrol, the study was supported by the Ministry of Health and Department of Educational Assistance, University and Research of the Autonomous Province of Bolzano, and the South Tyrolean Sparkasse Foundation. For the MICROS study, we thank the primary care practitioners Raffaella Stocker, Stefan Waldner, Toni Pizzocco, Josef Plangger, Ugo Marcadent, and the personnel of the Hospital of Silandro (Department of Laboratory Medicine) for their participation and collaboration in the research project.

**MIGen (Myocardial Infarction Genetics Consortium)** - National Heart, Lung, and Blood Institute's STAMPEED genomics research program (R01 HL087676) and the National Center for Research Resources (U54 RR020278)

**MORGAM (MOnica Risk, Genetics, Archiving and Monograph)** - The MORGAM study was part funded through the European Community's Sixth Framework Programme Cardiogenics project, grant agreement LSHM-CT-2006-037593 and Seventh Framework Programme ENGAGE project, grant agreement HEALTH-F4-2007-201413. We would like to acknowledge the staff from the Genotyping Facilities at the Wellcome Trust Sanger Institute for genotyping the data. The PRIME Study was supported by grants from Inserm, Merck Sharp and Dohme-Chibret Laboratory, the French Research Agency and the Foundation Heart and Arteries. We thank the following organisations that allowed the recruitment of participants for the PRIME: the health screening centres organised by the Social Security of Lille (Institut Pasteur), Strasbourg, Toulouse, and Tourcoing; the occupational medicine services of Haute-Garonne and of the Urban Community of Strasbourg; the Association Inter-entreprises des Services Médicaux du Travail de Lille et environs; the Comité pour le Développement de la Médecine du Travail; the Mutuelle Générale des Postes, Télégraphes et Téléphones du Bas-Rhin; the Laboratoire d'Analyses de l'Institut de Chimie Biologique de la Faculté de Médecine de Strasbourg; We also gratefully acknowledge the teams of the Lille, Strasbourg and Toulouse centres for their dedicate work and relentless energy in following up their cohorts; the contribution of the members of the event validation committees : L Guize; C Morrison; M-T Guillanneuf; and M Giroud and the Alliance Partnership Programme for its financial support. Sites and key personnel of contributing MORGAM Centres: **Finland:** FINRISK, National Institute for Health and Welfare, Helsinki: V. Salomaa (principal investigator), A. Juolevi, E. Vartiainen, P. Jousilahti; ATBC, National Institute for Health and Welfare, Helsinki: J. Virtamo (principal investigator), H. Kilpeläinen; MORGAM Data Centre, National Institute for Health and Welfare, Helsinki: K. Kuulasmaa (responsible person), Z. Cepaitis, A. Haukijärvi, B. Joseph, J. Karvanen, S. Kulathinal, M. Niemelä, O. Saarela; MORGAM Central Laboratory, National Institute for Health and Welfare, Helsinki: M. Perola (responsible person), P. Laiho, M. Sauramo. The ATBC Study was supported by US Public Health Service contracts N01-CN-45165, N01-RC-45035 and N01-RC-37004 from the National Cancer Institute. **France:** National Coordinating Centre, National Institute of Health and Medical Research (U258), Paris: P. Ducimetière (national coordinator), A. Bingham; PRIME/Strasbourg, Department of Epidemiology and Public Health, EA 3430, University of Strasbourg, Faculty of Medicine, Strasbourg: D. Arveiler (principal investigator), B. Haas, A. Wagner; PRIME/Toulouse, UMR INSERM 1027; and Department of Epidemiology, Toulouse University School of Medicine, Université Paul Sabatier, Toulouse: J. Ferrières (principal investigator), J-B. Ruidavets, V. Bongard, D. Deckers, C. Saulet, S. Barrere; PRIME/Lille, Department of Epidemiology and Public Health, INSERM U744-Université Lille Nord de France – Institut Pasteur de Lille: P. Amouyel (principal investigator), M. Montaye, B. Lemaire, S. Beauchant, D. Cottel, C. Graux, N. Marecaux, C. Steclebout, S. Szeremeta; MORGAM Laboratory, INSERM U937, Paris: F. Cambien (responsible person), L. Tiret, V. Nicaud. INSERM and InVS are acknowledged for their support. **Italy:** Centro Ricerche EPIMED - Epidemiologia e Medicina Preventiva, Dipartimento di Medicina Sperimentale. Università degli Studi dell'Insubria, Varese: M. Ferrario (principal investigator), G. Veronesi. Research Centre on Public Health, University of Milano-Bicocca, Monza, Italy: Giancarlo Cesana. This study was supported by the

Health Administration of Regione Lombardia [grant numbers 9783/1986, 41795/1993, 31737/1997 and 17155/2004], for the baseline examinations and the follow-up. Doctor Stefano Signorini (M.D.), Laboratory Medicine, Hospital of Desio is thanked for their support. United Kingdom: PRIME/Belfast, Queen's University Belfast, Belfast, Northern Ireland: F. Kee (principal investigator) A. Evans (former principal investigator), J. Yarnell, E. Gardner; MORGAM Coordinating Centre, Queen's University Belfast, Belfast, Northern Ireland: A. Evans (MORGAM coordinator), S. Cashman, F. Kee. UKCRC are acknowledged for their support. MORGAM Management Group: A. Evans (chair, Belfast, UK), S. Blankenberg (Hamburg, Germany), F. Cambien (Paris, France), M. Ferrario (Varese, Italy), K. Kuulasmaa (Helsinki, Finland), A. Palotie (Cambridge, UK), M. Perola (Helsinki, Finland), A. Peters (Neuherberg, Germany), V. Salomaa (Helsinki, Finland), H. Tunstall-Pedoe (Dundee, Scotland), P.G. Wiklund (Umeå, Sweden); Previous members: K. Asplund (Stockholm, Sweden), L. Peltonen (Helsinki, Finland), D. Shields (Dublin, Ireland), B. Stegmayr (Umeå, Sweden).

**NBS / UKBS-CC (UK Blood Services)** - We acknowledge use of DNA from The UK Blood Services collection of Common Controls (UKBS-CC collection), funded by the Wellcome Trust grant 084183/Z/07/Z and by NIHR programme grant to NHSBT (RP-PG-0310-1002). The collection was established as part of the Wellcome Trust Case Control Consortium (WTCCC).” The original manuscript reporting on the WTCCC study must be referenced in any written publication (Committee, et al 2007).

**NELSON (Nederlands Levens Longkanker Screenings Onderzoek Study)** - The NELSON study is supported, in part, by Zorg Onderzoek Nederland-Medische Wetenschappen, KWF Kankerbestrijding, Stichting Centraal Fonds Reserves van Voormalig Vrijwillige Ziekenfondsverzekeringen, G. Ph. Verhagen Foundation, Rotterdam Oncologic Thoracic Study Group, Erasmus Trust Fund, Foundation against Cancer, Flemish League against Cancer, ITEA2 (project Care4Me), and Lokaal Gezondheids Overleg (LOGO) Leuven and Hageland. Genotyping was supported through a European Union FP7 program (grant number: 201379) to COPACETIC (COPD Pathology: Addressing Critical gaps, Early Treatment & Diagnosis and Innovative Concepts)

**NESDA (Netherlands Study of Depression and Anxiety)** - Funding was obtained through the Geestkracht program of the Netherlands Organization for Health

**NFBC1966 (Northern Finland 1966 Birth Cohort)** - NFBC1966 received financial support from the Academy of Finland (project grants 104781, 120315, 129269, 1114194, 24300796, Center of Excellence in Complex Disease Genetics and SALVE), University Hospital Oulu, Biocenter, University of Oulu, Finland (75617), NHLBI grant 5R01HL087679-02 through the STAMPEED program (1RL1MH083268-01), NIH/NIMH (5R01MH63706:02), ENGAGE project and grant agreement HEALTH-F4-2007-201413, and the Medical Research Council, UK (G0500539, G0600705, G1002319, PrevMetSyn/SALVE, ). The DNA extractions, sample quality controls, biobank up-keeping and aliquotting was performed in the National Public Health Institute, Biomedicum Helsinki, Finland and supported financially by the Academy of Finland and Biocentrum Helsinki. We thank the late Professor Paula Rantakallio (launch of NFBC1966), and Ms Outi Tornwall and Ms Minttu Jussila (DNA biobanking). The authors would like to acknowledge the contribution of the late Academician of Science Leena Peltonen.

**NHS (Nurses Health Study) and HPFS (Health Professionals Follow-up Study)** - Funding grants: NIH U01CA-098233, R01HL71981, DK091718, DK046200

**NSHD (National Survey of Health and Development)** - This work was funded by the Medical Research Council (U123092720). We are very grateful to the members of this birth cohort for their continuing interest and participation in the study. This work was funded by the Medical Research Council (U123092720).

**NSPHS (Northern Swedish Population Health Study)** - The Northern Swedish Population Health Study was funded by the Swedish Medical Research Council (Project Number K2007-66X-20270-01-3), and the Foundation for Strategic Research

**NTR (Netherlands Twin Registry)** - Funding was obtained from the Netherlands Organization for Scientific Research (NWO: MagW/ZonMW grants 904-61-090,

**ORCADES (Orkney Complex Disease Study) (EUROSPAN)** - ORCADES was supported by the Chief Scientist Office of the Scottish Government, the Royal Society, the MRC Human Genetics Unit, Arthritis Research UK and the European Union framework program 6 EUROSPAN project (contract no. LSHG-CT-2006-018947). DNA extractions were performed at the Wellcome Trust Clinical Research Facility in Edinburgh. We would like to acknowledge the invaluable contributions of Lorraine Anderson and the research nurses in Orkney, the administrative team in Edinburgh and the people of Orkney.

**PIVUS (Prospective Investigation of the Vasculature in Uppsala Seniors)** - Genotyping was performed by the SNP&SEQ Technology Platform in Uppsala ([www.genotyping.se](http://www.genotyping.se)). We thank Tomas Axelsson, Ann-Christine Wiman and Caisa Pöntinen for their excellent assistance with genotyping. The SNP Technology Platform is supported by Uppsala University, Uppsala University Hospital and the Swedish Research Council for

Infrastructures. E.I. is supported by grants from the Swedish Research Council, the Swedish Heart-Lung Foundation, the Swedish Foundation for Strategic Research, and the Royal Swedish Academy of Science.

**PLCO/PLCO2 (Prostate, Lung, Colorectal, and Ovarian Cancer Screening Trial)** - This study within the Prostate, Lung, Colorectal, and Ovarian (PLCO) Cancer Screening Trial was funded by the Intramural Research Program of the Division of Cancer Epidemiology and Genetics, National Cancer Institute, NIH. The authors thank Drs. Christine Berg and Philip Prorok, Division of Cancer Prevention, NCI, the screening center investigators and staff of the PLCO Cancer Screening Trial, Mr. Thomas Riley and staff at Information Management Services, Inc., and Ms. Barbara O'Brien and staff at Westat, Inc. for their contributions to the PLCO. Finally, we are grateful to the study participants for donating their time and making this study possible.

**PREVEND (Prevention of REnal and Vascular ENd stage Disease)** - PREVEND genetics is supported by the Dutch Kidney Foundation (Grant E033), the National Institutes of Health (grant LM010098), The Netherlands Organization for Scientific Research (NWO-Groot 175.010.2007.006, NWO VENI grant 916.761.70 and 916.10.117, ZonMW 90.700.441), and the Dutch Inter University Cardiology Institute Netherlands. N. Verweij is supported by the Netherlands Heart Foundation (grant NHS2010B280).

**PROCARDIS (Precocious Coronary Artery Disease Consortium)** - PROCARDIS was supported by the European Community Sixth Framework Program (LSHM-CT- 2007-037273), AstraZeneca, the Swedish Research Council, the Knut and Alice Wallenberg Foundation, the Swedish Heart-Lung Foundation, the Torsten and Ragnar Söderberg Foundation, the Strategic Cardiovascular Program of Karolinska Institutet and Stockholm County Council, the Foundation for Strategic Research and the Stockholm County Council (560283).

**PROSPER/PHASE (PHarmacogenomic study of Statins in the Elderly (PHASE) at risk for CHD (GWAS project in the PROSPER study)** - The PROSPER study was supported by an investigator initiated grant obtained from Bristol-Myers Squibb. Prof. Dr. J. W. Jukema is an Established Clinical Investigator of the Netherlands Heart Foundation (grant 2001 D 032). Support for genotyping was provided by the seventh framework program of the European commission (grant 223004) and by the Netherlands Genomics Initiative (Netherlands Consortium for Healthy Aging grant 050-060-810).

**QFS (Quebec Family Study)** - The Quebec Family Study was funded by multiple grants from the Medical Research Council of Canada and the Canadian Institutes for Health Research. This work was supported by a team grant from the Canadian Institutes for Health Research (FRCN-CCT-83028)

**QIMR Polygene (Twins studies at the Queensland Institute of Medical Research)** - We are grateful to the twins and their families for their generous participation in these studies. We would like to thank staff at the Queensland Institute of Medical Research: Dixie Statham, Ann Eldridge and Marlene Grace for sample collection, Lisa Bowdler, Steven Crooks and staff of the Molecular Epidemiology Laboratory for sample processing and preparation, Scott Gordon, Brian McEvoy, Belinda Cornes and Beben Benyamin for data QC and preparation, and David Smyth and Harry Beeby for IT support. We acknowledge funding from the Australian National Health and Medical Research Council (NHMRC grants 241944, 389875, 389891, 389892, 389938, 442915, 442981, 496739, 496688, 552485 and 613672), the U.S. National Institute of Health (grants AA07535, AA10248, AA014041, AA13320, AA13321, AA13326 and DA12854) and the Australian Research Council (ARC grant DP0770096).

**RISC (Relationship between Insulin Sensitivity and Cardiovascular disease Study)** - The RISC Study is partly supported by EU grant QL1-CT-2001-01252. Additional support for the RISC Study has been provided by AstraZeneca (Sweden).

**RS (The Rotterdam Study)** - The Rotterdam Study is funded by Erasmus Medical Center and Erasmus University, Rotterdam, Netherlands Organization for the Health Research and Development (ZonMw), the Research Institute for Diseases in the Elderly (RIDE), the Ministry of Education, Culture and Science, the Ministry for Health, Welfare and Sports, the European Commission (DG XII), and the Municipality of Rotterdam. The authors are grateful to the study participants, the staff from the Rotterdam Study and the participating general practitioners and pharmacists. The generation and management of GWAS genotype data for the Rotterdam Study is supported by the Netherlands Organisation of Scientific Research NWO Investments (nr. 175.010.2005.011, 911-03-012). This study is funded by the Research Institute for Diseases in the Elderly (014-93-015; RIDE2), the Netherlands Genomics Initiative (NGI)/Netherlands Organisation for Scientific Research (NWO) project nr. 050-060-810. We thank Pascal Arp, Mila Jhamai, Marijn Verkerk, Lizbeth Herrera and Marjolein Peters for their help in creating the GWAS database, and Karol Estrada and Maksim V. Struchalin for their support in creation and analysis of imputed data. We would like to thank Karol Estrada, Dr. Fernando Rivadeneira, Dr. Tobias A. Knoch, Anis Abuseiris, Luc V. de Zeeuw, and Rob de Graaf (Erasmus MC Rotterdam, The Netherlands), for their help in creating GRIMP, and BigGRID, MediGRID, and Services@MediGRID/D-Grid, (funded by the German Bundesministerium fuer Forschung und Technology; grants 01 AK 803 A-H, 01 IG 07015 G) for access to their grid computing resources.

**RUNMC (The Nijmegen Bladder Cancer Study & The Nijmegen Biomedical Study)** - The RUNMC study was supported by an investment grant of the Radboud University Medical Centre, Nijmegen, The Netherlands

**SardiNIA** - We thank all the volunteers who generously participated in this study, Monsignore Piseddu, Bishop of Ogliastra and the mayors and citizens of the Sardinian towns (Lanusei, Ilbono, Arzana, and Elini). This work was supported by the Intramural Research Program of the National Institute on Aging (NIA), National Institutes of Health (NIH). The SardiNIA ("Progenia") team was supported by Contract NO1-AG-1-2109 from the NIA; the efforts of GRA were supported in part by contract 263-MA-410953 from the NIA to the University of Michigan and by research grant HG002651 and HL084729 from the NIH (to GRA).

**SASBAC (Swedish And Singapore Breast Association Consortium)** - The SASBAC study was supported by funding from the Agency for Science, Technology and Research of Singapore (A\*STAR), the United States National Institute of Health (NIH) and the Susan G. Komen Breast Cancer Foundation. E.I. was supported by grants from the Swedish Research Council, the Swedish Heart-Lung Foundation, the Swedish Society of Medicine, the Swedish Foundation for Strategic Research, and the Royal Swedish Academy of Science while working with this article.

**SEARCH (Studies of Epidemiology and Risk factors in Cancer Heredity)** - SEARCH is funded by Cancer Research UK (C490/A10119, C490/A10124, C490/A8339).

**SHIP/SHIP-TREND (Study of Health in Pomerania)** - SHIP is part of the Community Medicine Research net of the University of Greifswald, Germany, which is funded by the Federal Ministry of Education and Research (grants no. 01ZZ9603, 01ZZ0103, and 01ZZ0403), the Ministry of Cultural Affairs as well as the Social Ministry of the Federal State of Mecklenburg-West Pomerania, and the network 'Greifswald Approach to Individualized Medicine (GANI\_MED)' funded by the Federal Ministry of Education and Research (grant 03IS2061A). Genome-wide data have been supported by the Federal Ministry of Education and Research (grant no. 03ZIK012) and a joint grant from Siemens Healthcare, Erlangen, Germany and the Federal State of Mecklenburg-West Pomerania. The University of Greifswald is a member of the 'Center of Knowledge Interchange' program of the Siemens AG and the Caché Campus program of the InterSystems GmbH.

**Sorbs (Sorbs are self-contained population from Eastern Germany, European Descent)** - This work was supported by grants from the German Research Council (SFB- 1052 "Obesity mechanisms"), from the German Diabetes Association and from the DHFD (Diabetes Hilfs- und Forschungsfonds Deutschland). IFB AdiposityDiseases is supported by the Federal Ministry of Education and Research (BMBF), Germany, FKZ: 01EO1001. We would like to thank Knut Krohn (Microarray Core Facility of the Interdisciplinary Centre for Clinical Research, University of Leipzig) for the genotyping/analytical support and Joachim Thiery (Institute of Laboratory Medicine, Clinical Chemistry and Molecular Diagnostics, University of Leipzig) for clinical chemistry services. We thank Nigel W. Rayner (WTCHG, University of Oxford, UK) for the excellent bioinformatics support. Reedik Mägi is funded by European Commission under the Marie Curie Intra-European Fellowship and by Estonian Government (grant #SF0180142s08).

**STR (Swedish Twin Registry)** - This work was supported by grants from the US National Institutes of Health (AG028555, AG08724, AG04563, AG10175, AG08861), the Swedish Research Council, the Swedish Heart-Lung Foundation, the Swedish Foundation for Strategic Research, the Royal Swedish Academy of Science, and ENGAGE (within the European Union Seventh Framework Programme, HEALTH-F4-2007-201413). Genotyping was performed by the SNP&SEQ Technology Platform in Uppsala ([www.genotyping.se](http://www.genotyping.se)). We thank Tomas Axelsson, Ann-Christine Wiman and Caisa Pöntinen for their excellent assistance with genotyping. The SNP Technology Platform is supported by Uppsala University, Uppsala University Hospital and the Swedish Research Council for Infrastructures.

**THISEAS (The Hellenic study of interactions between SNPs & Eating in Atherosclerosis)** - Recruitment for THISEAS was partially funded by a research grant (PENED 2003) from the Greek General Secretary of Research and Technology; we thank all the dieticians and clinicians for their contribution to the project.

**TRAILS (TRacking Adolescents' Individual Lives Survey)** - Participating centers of TRAILS include various departments of the University Medical Center and University of Groningen, the Erasmus University Medical Center Rotterdam, the University of Utrecht, the Radboud Medical Center Nijmegen, and the Parnassia Bavo group, all in the Netherlands. TRAILS has been financially supported by various grants from the Netherlands Organization for Scientific Research NWO (Medical Research Council program grant GB-MW 940-38-011; ZonMW Brainpower grant 100-001-004; ZonMw Risk Behavior and Dependence grants 60-60600-97-118; ZonMw Culture and Health grant 261-98-710; Social Sciences Council medium-sized investment grants GB-MaGW 480-01-006 and GB-MaGW 480-07-001; Social Sciences Council project grants GB-MaGW 452-04-314 and GB-MaGW 452-06-004; NWO large-sized investment grant 175.010.2003.005; NWO Longitudinal Survey and Panel Funding 481-08-013), the Dutch Ministry of Justice (WODC), the European Science Foundation (EuroSTRESS project FP-006), Biobanking and Biomolecular Resources Research Infrastructure BBMRI-NL (CP 32), and the participating universities. We are grateful to all adolescents, their parents and teachers who participated in this research and to everyone who worked on this project and made it possible. Statistical



analyses were carried out on the Genetic Cluster Computer (<http://www.geneticcluster.org>), which is financially supported by the Netherlands Scientific Organization (NWO 480-05-003) along with a supplement from the Dutch Brain Foundation.

**Tromsø** - University of Tromsø, Norwegian Research Council (project number 185764)

**TwinGene** - This work was supported by grants from the Ministry for Higher Education, the Swedish Research Council (M-2005-1112 and 2009-2298), GenomEUtwin (EU/QLRT-2001-01254; QLG2-CT-2002-01254), NIH grant DK U01-066134, The Swedish Foundation for Strategic Research (SSF; ICA08-0047).

**TwinsUK** - The study was funded by the Wellcome Trust; European Community's Seventh Framework Programme (FP7/2007-2013), ENGAGE project grant agreement (HEALTH-F4-2007-201413). The study also receives support from the Dept of Health via the National Institute for Health Research (NIHR) comprehensive Biomedical Research Centre award to Guy's & St Thomas' NHS Foundation Trust in partnership with King's College London. TDS is an NIHR senior Investigator and is holder of an ERC Advanced Principal Investigator award. Genotyping was performed by The Wellcome Trust Sanger Institute, support of the National Eye Institute via an NIH/CIDR genotyping project.

**ULSAM (Uppsala Longitudinal Study of Adult Men)** - Genotyping was performed by the SNP&SEQ Technology Platform in Uppsala ([www.genotyping.se](http://www.genotyping.se)). We thank Tomas Axelsson, Ann-Christine Wiman and Caisa Pöntinen for their excellent assistance with genotyping. The SNP Technology Platform is supported by Uppsala University, Uppsala University Hospital and the Swedish Research Council for Infrastructures. E.I. is supported by grants from the Swedish Research Council, the Swedish Heart-Lung Foundation, the Swedish Foundation for Strategic Research, and the Royal Swedish Academy of Science.

**WGHS (Women's Genome Health Study)** - The WGHS is supported by HL043851 and HL080467 from the National Heart, Lung, and Blood Institute and CA047988 from the National Cancer Institute with collaborative scientific support and funding for genotyping provided by Amgen.

**Whitehall-II (also known as the Stress and Health Study)** - The Whitehall-II study was supported by the Medical Research Council, the BHF, and the National Institutes of Health (R01HL36310). Whitehall-II genotyping was, in part, supported by a Medical Research Council-GlaxoSmithKline pilot program grant (ID 85374) and the BHF (PG/07/133/24260, RG/08/008, SP/07/007/23671) and a senior fellowship to i (FS/2005/125). Dr Kumari's and Prof. Kivimäki's time on this manuscript was partially supported by the National Heart Lung and Blood Institute (NHLBI: HL36310).

**WTCCC-CAD (WTCCC Coronary Artery Disease cases)** - Recruitment of the WTCCC-CAD cases was funded by the British Heart Foundation (BHF) and genotyping by the Wellcome Trust as part of the WTCCC Study. NJS holds a Chair funded by the BHF and is supported by the NIHR Leicester Cardiovascular Biomedical Research Unit

**WTCCC-T2D** - Mark McCarthy is supported through Wellcome Trust grants (090532, 085301, 081917, 098381, 090367), the European Commission grant HEALTH-F4-2007-201413, and the MRC G0601261. Mark McCarthy is an NIHR senior investigator and a Wellcome Trust senior investigator. Andrew Morris is supported through the Wellcome Trust (WT081682, WT098017 and WT090532). Reedik Mägi is funded by European Commission under the Marie Curie Intra-European Fellowship and by Estonian Government (grant #SF0180142s08).

**YFS (Young Finns Study)** - The Young Finns Study has been financially supported by the Academy of Finland: grants 134309 (Eye), 126925, 121584, 124282, 129378 (Salve), 117787 (Gendi), and 41071 (Skidi), the Social Insurance Institution of Finland, Kuopio, Tampere and Turku University Hospital Medical Funds (grant 9M048 for 9N035 for TeLeht), Juho Vainio Foundation, Paavo Nurmi Foundation, Finnish Foundation of Cardiovascular Research and Finnish Cultural Foundation, Tampere Tuberculosis Foundation and Emil Aaltonen Foundation.

## 4. Affiliations of investigators from acknowledged consortia

### eMERGE Consortium

#### Marshfield

Catherine A. McCarty, PhD, MPH, Principal Investigator; Justin Starren, MD, PhD, Informatics; Peggy Peissig, Informatics; Richard Berg, MS, Statistician; Luke Rasmussen, Programmer; James Linneman, Programmer Analyst; Aaron Miller, Programmer Analyst; Vidhu Choudary, Programmer Analyst; Lin Chen, MD, Ophthalmologist; Carol Waudby, MA, Research Coordinator; Terrie Kitchner, Senior Research Coordinator; Jonathan Reeser, MD, IRB Chair; Norman Fost, MD, Ethicist, University of Wisconsin; Marylyn Ritchie, PhD, Statistician, Vanderbilt University; Russell A. Wilke, MD, PhD, Internist and Pharmacologist, Vanderbilt University

#### Northwestern

Rex L. Chisholm, PhD, Principal Investigator; Pedro C. Avila, MD, Allergist/Immunologist; Philip Greenland, MD, Epidemiologist; M. Geoff Hayes, PhD, Statistical Geneticist; Abel Kho, MD, MS, Internist and Informatics; Warren A. Kibbe, PhD, Informatics; Amy A. Lemke, MS, PhD, public health/community engagement; William L. Lowe, MD, Endocrinologist; Maureen E. Smith, MS, CGC, genetic counselor/community engagement; Wendy A. Wolf, PhD, community engagement/program management; Jennifer A. Pacheco, Programmer Analyst; William K. Thompson, PhD, programmer/natural language processing; Joel Humowiecki, Data Analyst; May Law, MPH, Programmer Analyst/Statistician.

#### Mayo

Christopher Chute, MD, PhD, Principal Investigator; Iftikar Kullo, M.D, Co- Investigator; Barbara Koenig, PhD, Co-Investigator -bioethics; Mariza de Andrade, PhD, Co-Investigator -statistical genetics; Suzette Bielinski, PhD, Co- Investigator -epidemiology; Jyotishman Pathak, PhD, informatics; Guergana Savova, PhD, informatics/natural language processing; Joel Wu, JD, bioethics; Joan Henriksen, PhD, bioethics; Keyue Ding, PhD, genome science; Lacey Hart, MBA, program management; Jeremy Palbicki, programmer analyst

#### Group Health

Eric B. Larson, M.D., MPH Overall Principal Investigator, Katherine Newton, PhD, epidemiologist, Evette Ludman, Ph.D, behavioral scientist, Leslie Spangler, Ph.D., epidemiologist, Gene Hart, M.S., Programmer, David Carrell, Ph.D., programmer/natural language processing. University of Washington Gail Jarvik M.D., Ph.D., University of Washington site Principal Investigator, genetic analysis, phenotypes, and bioethics, Paul Crane, M.D., MPH, General Internist, Wylie Burke, M.D., Ph.D., bioethics, Stephanie Malia Fullerton, Ph.D., bioethics, Susan Brown Trinidad, M.A., bioethics, Fred Hutchinson Cancer Research Center team: Chris Carlson Ph.D., Fred Hutchinson Cancer Research Center site Principal Investigator, biostatistics and genomics, Andrew McDavid, programmer/analyst.

#### Vanderbilt

Dan M. Roden, M.D., Principal Investigator; Ellen Clayton, M.D., J.D., bioethics; Jonathan L. Haines, Ph.D., genome science; Daniel R. Masys, M.D., informatics and Coordinating Center PI; Larry R. Churchill, Ph.D., bioethics; Daniel Cornfield, Ph.D., sociology/community engagement; Dana Crawford, Ph.D., statistical genetics/genome science; Dawood Darbar, M.D., Ph.D., electrophysiology; Joshua C. Denny, M.D., M.S., informatics/natural language processing; Bradley A Malin, Ph.D., informatics/privacy protection; Marylyn D. Ritchie, Ph.D., statistical genetics/genome science; Jonathan S. Schildcrout, Ph.D., biostatistics, Hua Xu, Ph.D., informatics/natural language processing; Andrea Havens Ramirez, M.D., clinical phenotyping; Melissa Basford, M.B.A., program management; Jill Pulley, M.B.A., program management.

### The LifeLines Cohort Study

Behrooz Z Alizadeh (1), Rudolf A de Boer (2), H Marika Boezen (1), Marcel Bruinenberg (3), Lude Franke (4), Pim van der Harst (2), Hans L Hillege (1,2), Melanie M van der Klauw (5), Gerjan Navis (6), Johan Ormel (7), Dirkje S Postma (8), Judith GM Rosmalen (7), Joris P Slaets (9), Harold Snieder (1), Ronald P Stolk (1), Bruce HR Wolffenbuttel (5), Cisca Wijmenga (4)

(1) Department of Epidemiology, University of Groningen, University Medical Center Groningen, The Netherlands  
(2) Department of Cardiology, University of Groningen, University Medical Center Groningen, The Netherlands

- (3) LifeLines Cohort Study, University of Groningen, University Medical Center Groningen, The Netherlands  
 (4) Department of Genetics, University of Groningen, University Medical Center Groningen, The Netherlands  
 (5) Department of Endocrinology, University of Groningen, University Medical Center Groningen, The Netherlands  
 (6) Department of Internal Medicine, Division of Nephrology, University of Groningen, University Medical Center Groningen, The Netherlands  
 (7) Interdisciplinary Center of Psychopathology and Emotion Regulation (ICPE), Department of Psychiatry, University of Groningen, University Medical Center Groningen, The Netherlands  
 (8) Department of Pulmonology, University of Groningen, University Medical Center Groningen, The Netherlands  
 (9) University Center for Geriatric Medicine, University of Groningen, University Medical Center Groningen, The Netherlands

### **The MIGN Consortium Investigators**

**Manuscript preparation.** Sekar Kathiresan<sup>1,2,3,4</sup> (leader), Benjamin F Voight<sup>2,3,5</sup>, Shaun Purcell<sup>2,3,6</sup>, Kiran Musunuru<sup>1,2,3,4</sup>, Diego Ardissino<sup>7</sup>, Pier M Mannucci<sup>8</sup>, Sonia Anand<sup>9</sup>, James C Engert<sup>10</sup>, Nilesh J Samani<sup>11</sup>, Heribert Schunkert<sup>12</sup>, Jeanette Erdmann<sup>12</sup>, Muredach P Reilly<sup>13,14</sup>, Daniel J Rader<sup>13,14</sup>, Thomas Morgan<sup>15</sup>, John A Spertus<sup>16</sup>, Monika Stoll<sup>17</sup>, Domenico Girelli<sup>18</sup>, Pascal P McKeown<sup>19</sup>, Chris C Patterson<sup>19</sup>, David S Siscovick<sup>20</sup>, Christopher J O'Donnell<sup>1,4,21</sup>, Roberto Elosua<sup>22</sup>, Leena Peltonen<sup>3,23,24</sup>, Veikko Salomaa<sup>25</sup>, Stephen M Schwartz<sup>20,26</sup>, Olle Melander<sup>27</sup>, David Altshuler<sup>2,3,4,5,28</sup>

**Italian Atherosclerosis, Thrombosis and Vascular Biology Study.** Diego Ardissino<sup>7</sup>, Pier Angelica Merlini<sup>29</sup>, Carlo Berzuini<sup>30</sup>, Luisa Bernardinelli<sup>30,31</sup>, Flora Peyvandi<sup>8</sup>, Marco Tubaro<sup>32</sup>, Patrizia Celli<sup>33</sup>, Maurizio Ferrario<sup>34</sup>, Raffaella Fetiveau<sup>34</sup>, Nicola Marziliano<sup>34</sup>, Giorgio Casari<sup>35</sup>, Michele Galli<sup>36</sup>, Flavio Ribichini<sup>37</sup>, Marco Rossi<sup>38</sup>, Francesco Bernardi<sup>39</sup>, Pietro Zoncin<sup>40</sup>, Alberto Piazza<sup>41</sup>, Pier M Mannucci<sup>8</sup>

**Heart Attack Risk in Puget Sound.** Stephen M Schwartz<sup>20,26</sup>, David S Siscovick<sup>20</sup>, Jean Yee<sup>20,26</sup>, Yechiel Friedlander<sup>42</sup>

**Registre Gironi del COR.** Roberto Elosua<sup>22</sup>, Jaume Marrugat<sup>22</sup>, Gavin Lucas<sup>22</sup>, Isaac Subirana<sup>22</sup>, Joan Sala<sup>43</sup>, Rafael Ramos<sup>44</sup>

**Massachusetts General Hospital Premature Coronary Artery Disease Study.** Sekar Kathiresan<sup>1,2,3,4</sup>, James B Meigs<sup>4,45</sup>, Gordon Williams<sup>4,46</sup>, David M Nathan<sup>4,47</sup>, Calum A MacRae<sup>1,4</sup>, Christopher J O'Donnell<sup>1,4,21</sup>

**FINRISK.** Veikko Salomaa<sup>25</sup>, Aki S Havulinna<sup>25</sup>, Leena Peltonen<sup>3,23,24</sup>

**Malmo Diet and Cancer Study.** Olle Melander<sup>27</sup>, Goran Berglund<sup>48</sup>

**Stage 1 data analysis.** Benjamin F Voight<sup>2,3,5</sup> (leader), Sekar Kathiresan<sup>1,2,3,4</sup>, Joel N Hirschhorn<sup>3,28</sup>, Rosanna Asselta<sup>49</sup>, Stefano Duga<sup>49</sup>, Marta Sreafico<sup>8</sup>, Kiran Musunuru<sup>1,2,3,4</sup>, Mark J Daly<sup>2,3,4</sup>, Shaun Purcell<sup>2,3,6</sup>

**Copy number variant analysis.** Benjamin F Voight<sup>2,3,5</sup>, Shaun Purcell<sup>2,3,6</sup>, James Nemesh<sup>3</sup>, Joshua M Korn<sup>2,3,5</sup>, Steven A McCarroll<sup>2,3,5</sup>

**Stage 1 phenotype data assembly.** Stephen M Schwartz<sup>20,26</sup> (leader), Jean Yee<sup>20,26</sup>, Sekar Kathiresan<sup>1,2,3,4</sup>, Gavin Lucas<sup>22</sup>, Isaac Subirana<sup>22</sup>, Roberto Elosua<sup>22</sup>

**Stage 1 genome-wide genotyping.** Aarti Surti<sup>3</sup>, Candace Guiducci<sup>3</sup>, Lauren Gianniny<sup>3</sup>, Daniel Mirel<sup>3</sup>, Melissa Parkin<sup>3</sup>, Noel Burt<sup>3</sup>, Stacey B Gabriel<sup>3</sup> (leader)

### **Replication studies:**

**Wellcome Trust Case Control Consortium.** Nilesh J Samani<sup>11</sup>, John R Thompson<sup>50</sup>, Peter S Braund<sup>11</sup>, Benjamin J Wright<sup>50</sup>, Anthony J Balmforth<sup>51</sup>, Stephen G Ball<sup>51</sup>, Alistair S Hall<sup>51</sup>, Wellcome Trust Case Control Consortium<sup>68</sup>

**German MI Family Study I.** Heribert Schunkert<sup>12</sup>, Jeanette Erdmann<sup>12</sup>, Patrick Linsel-Nitschke<sup>12</sup>, Wolfgang Lieb<sup>12</sup>, Andreas Ziegler<sup>52</sup>, Inke R König<sup>52</sup>, Christian Hengstenberg<sup>53</sup>, Marcus Fischer<sup>53</sup>, Klaus Stark<sup>53</sup>, Anika Grosshennig<sup>12,52</sup>, Michael Preuss<sup>12,52</sup>, H-Erich Wichmann<sup>54,55</sup>, Stefan Schreiber<sup>56</sup>

**Cardiogenics.** Heribert Schunkert<sup>12</sup>, Nilesh J Samani<sup>11</sup>, Jeanette Erdmann<sup>12</sup>, Willem Ouwehand<sup>57</sup>, Christian Hengstenberg<sup>53</sup>, Panos Deloukas<sup>23</sup>, Michael Scholz<sup>58</sup>, Francois Cambien<sup>59</sup>, Alison Goodall<sup>11</sup>, Cardiogenics<sup>68</sup>

**PennCATH/MedSTAR.** Muredach P Reilly<sup>13,14</sup>, Mingyao Li<sup>60</sup>, Zhen Chen<sup>60</sup>, Robert Wilensky<sup>13,14</sup>, William Matthai<sup>14</sup>, Atif Qasim<sup>14</sup>, Hakon H Hakonarson<sup>61</sup>, Joe Devaney<sup>62</sup>, Mary-Susan Burnett<sup>62</sup>, Augusto D Pichard<sup>62</sup>, Kenneth M Kent<sup>62</sup>, Lowell Satler<sup>62</sup>, Joseph M Lindsay<sup>62</sup>, Ron Waksman<sup>62</sup>, Christopher W Knouff<sup>69</sup>, Dawn M Waterworth<sup>69</sup>, Max C Walker<sup>69</sup>, Vincent Mooser<sup>69</sup>, Stephen E Epstein<sup>62</sup>, Daniel J Rader<sup>13,14</sup>

**Acute Myocardial Infarction Gene Study/Dortmund Health Study.** Thomas Scheffold<sup>63</sup>, Klaus Berger<sup>64</sup>, Monika Stoll<sup>17</sup>, Andreas Hüge<sup>17</sup>

**Verona Heart Study.** Domenico Girelli<sup>18</sup>, Nicola Martinelli<sup>18</sup>, Oliviero Olivieri<sup>18</sup>, Roberto Corrocher<sup>18</sup>

**Mid-America Heart Institute.** Thomas Morgan<sup>15</sup>, John A Spertus<sup>16</sup>

**Irish Family Study.** Pascal P McKeown<sup>19</sup>, Chris C Patterson<sup>19</sup>

**German MI Family Study II.** Heribert Schunkert<sup>12</sup>, Jeanette Erdmann<sup>12</sup>, Patrick Linsel-Nitschke<sup>12</sup>, Wolfgang Lieb<sup>12</sup>, Andreas Ziegler<sup>52</sup>, Inke R König<sup>52</sup>, Christian Hengstenberg<sup>53</sup>, Marcus Fischer<sup>53</sup>, Klaus Stark<sup>53</sup>, Anika Grosshennig<sup>12,52</sup>, Michael Preuss<sup>12,52</sup>, H-Erich Wichmann<sup>54,55</sup>, Stefan Schreiber<sup>56</sup>

**deCODE Study.** Hilma Hólm<sup>65</sup>, Gudmar Thorleifsson<sup>65</sup>, Unnur Thorsteinsdottir<sup>65,66</sup>, Kari Stefansson<sup>65,66</sup>

**INTERHEART.** James C Engert<sup>10</sup>, Ron Do<sup>67</sup>, Changchun Xie<sup>9</sup>, Sonia Anand<sup>9</sup>

**MIGN steering committee.** Sekar Kathiresan<sup>1,2,3,4</sup>, Diego Ardissino<sup>7</sup>, Pier M Mannucci<sup>8</sup>, David Siscovick<sup>20</sup>, Christopher J O'Donnell<sup>1,4,21</sup>, Nilesh J Samani<sup>11</sup>, Olle Melander<sup>27</sup>, Roberto Elosua<sup>22</sup>, Leena Peltonen<sup>3,23,24</sup>, Veikko Salomaa<sup>25</sup>, Stephen M Schwartz<sup>20,26</sup>, David Altshuler<sup>2,3,4,5,28</sup> (leader)

1. Cardiovascular Research Center and Cardiology Division, Massachusetts General Hospital, Boston, Massachusetts 02114, USA.
2. Center for Human Genetic Research, Massachusetts General Hospital, Boston, Massachusetts 02114, USA.
3. Program in Medical and Population Genetics, Broad Institute of MIT and Harvard, Cambridge, Massachusetts 02142, USA.
4. Department of Medicine, Harvard Medical School, Boston, Massachusetts 02115, USA.
5. Department of Molecular Biology, Massachusetts General Hospital, Boston, Massachusetts, 02114, USA.
6. Stanley Center for Psychiatric Research, Broad Institute of MIT and Harvard, Cambridge, Massachusetts 02142, USA.
7. Division of Cardiology, Azienda Ospedaliero-Universitaria di Parma, 43100 Parma, Italy.
8. Department of Internal Medicine and Medical Specialities, Fondazione Istituto di Ricovero e Cura a Carattere Scientifico, Ospedale Maggiore, Mangiagalli e Regina Elena, University of Milan, 20122 Milan, Italy.
9. Population Health Research Institute, Hamilton Health Sciences and Departments of Medicine and Clinical Epidemiology and Biostatistics, McMaster University, Hamilton, L8L 2X2 Ontario, Canada.
10. Departments of Medicine and Human Genetics, McGill University, Montréal, H3A 1A1 Québec, Canada.
11. Department of Cardiovascular Sciences, University of Leicester, Glenfield Hospital, LE3 9QP, UK.
12. Medizinische Klinik II, Universität zu Lübeck, 23538 Lübeck, Germany.
13. The Institute for Translational Medicine and Therapeutics, School of Medicine, University of Pennsylvania, Philadelphia, Pennsylvania 19104, USA.
14. The Cardiovascular Institute, University of Pennsylvania, Philadelphia, Pennsylvania 19104, USA.
15. Department of Pediatrics, Vanderbilt University School of Medicine, Nashville, Tennessee 37232, USA.
16. Mid-America Heart Institute and University of Missouri-Kansas City, Kansas City, Missouri 64111, USA.
17. Leibniz-Institute for Arteriosclerosis Research, University Münster, 48149 Münster, Germany.
18. Department of Clinical and Experimental Medicine, University of Verona, 37134 Verona, Italy.
19. Centre for Public Health, Queen's University Belfast, Institute of Clinical Science, Belfast, BT12 6BJ, Northern Ireland, UK.
20. Cardiovascular Health Research Unit, Departments of Medicine and Epidemiology, University of Washington, Seattle, Washington 98101, USA.
21. Framingham Heart Study and National, Heart, Lung, and Blood Institute, Framingham, Massachusetts 01702, USA.
22. Cardiovascular Epidemiology and Genetics, Institut Municipal D'investigacio Medica, and CIBER Epidemiología y Salud Pública, 08003 Barcelona, Spain.
23. Wellcome Trust Sanger Institute, Cambridge CB10 1SA, UK.
24. Institute for Molecular Medicine, University of Helsinki, Helsinki 00029, Finland.
25. Chronic Disease Epidemiology Unit, Department of Health Promotion and Chronic Disease Prevention, National Public Health Institute, Helsinki 00300, Finland.
26. Department of Epidemiology, University of Washington, Seattle, Washington 98195, USA.
27. Department of Clinical Sciences, Hypertension and Cardiovascular Diseases, University Hospital Malmö, Lund University, Malmö 20502, Sweden.
28. Department of Genetics, Harvard Medical School, Boston, Massachusetts 02115, USA.
29. Division of Cardiology, Azienda Ospedaliera Niguarda Ca' Granda, 20162 Milan, Italy.
30. Biostatistics Unit, Medical Research Council, Cambridge, UK and Statistical Laboratory, Centre for Mathematical Sciences, Wilberforce Road, Cambridge CB3 0WA, UK.
31. Department of Applied Health Sciences, University of Pavia, 27100 Pavia, Italy.
32. Division of Cardiology, Ospedale San Filippo Neri, 00135 Rome, Italy.
33. Division of Cardiology, Ospedale San Camillo, 00151 Rome, Italy.
34. Fondazione Istituto di Ricovero e Cura a Carattere Scientifico, Policlinico San Matteo, 27100 Pavia, Italy.
35. Vita-Salute San Raffaele University and San Raffaele Scientific Institute, 20132 Milan, Italy.
36. Division of Cardiology, Ospedale di Livorno, 57100 Livorno, Italy.
37. Division of Cardiology, Ospedale Borgo Trento, University of Verona, 37126 Verona, Italy.
38. Division of Cardiology, Istituto di Ricovero e Cura a Carattere Scientifico, Istituto Clinico Humanitas, 20089 Milan, Italy.
39. Department of Biochemistry and Molecular Biology, University of Ferrara, 44100 Ferrara, Italy.
40. Division of Cardiology, Ospedale di Rovigo, 45100 Rovigo, Italy.
41. Department of Genetics, Biology and Biochemistry, University of Turin, 10126 Turin, Italy.
42. Unit of Epidemiology, Hebrew University-Hadassah School of Public Health, Jerusalem 91120, Israel.
43. Servei de Cardiologia i Unitat Coronària, Hospital de Girona Josep Trueta and Institut de Investigació Biomedica de Girona, 17007 Girona, Spain.
44. Unitat de Recerca i Unitat Docent de Medicina de Família de Girona, IDIAP Jordi Gol, Institut Català de la Salut, 08007 Barcelona, Spain.
45. General Medicine Division, Department of Medicine, Massachusetts General Hospital, Boston, Massachusetts, 02114, USA.
46. Cardiovascular Endocrinology Section, Division of Endocrinology, Diabetes, and Hypertension, Brigham and Women's Hospital, Boston, Massachusetts 02115, USA.
47. Diabetes Center, Massachusetts General Hospital, Boston, Massachusetts 02114, USA.

48. Department of Clinical Sciences, Internal Medicine, University Hospital Malmö, Lund University, Malmö 20502, Sweden.
49. Department of Biology and Genetics for Medical Sciences, University of Milan, 20133 Milan, Italy.
50. Department of Health Sciences, University of Leicester, Leicester, LE1 7RH, UK.
51. LIGHT Research Institute, Faculty of Medicine and Health, University of Leeds, Leeds, LS1 3EX, UK.
52. Institut für Medizinische Biometrie und Statistik, Universität zu Lübeck, 23538 Lübeck, Germany.
53. Klinik und Poliklinik für Innere Medizin II, Universität Regensburg, 93042 Regensburg, Germany.
54. Institute of Epidemiology, Helmholtz Zentrum München – German Research Center for Environmental Health, 85764 Neuherberg, Germany.
55. Institute of Medical Information Science, Biometry and Epidemiology, Ludwig-Maximilians-Universität Munich, 81377 Munich, Germany.
56. Institut für Klinische Molekularbiologie, Christian-Albrechts Universität, 24105 Kiel, Germany.
57. Department of Haematology, University of Cambridge, Long Road, Cambridge, CB2 2PT, UK.
58. Trium Analysis Online GmbH, 81677 Munich, Germany.
59. INSERM UMR\_S 525, Université Pierre et Marie Curie–Paris 6, Paris 75634, France.
60. Biostatistics and Epidemiology, University of Pennsylvania, Philadelphia, Pennsylvania 19104, USA.
61. The Center for Applied Genomics, Children's Hospital of Philadelphia, Philadelphia, Pennsylvania 19104, USA.
62. Cardiovascular Research Institute, MedStar Research Institute, Washington Hospital Center, Washington, DC 20010, USA.
63. Institute for Heart and Circulation Research of the University of Witten/Herdecke, 44227 Dortmund, Germany.
64. Institute of Epidemiology and Social Medicine, University of Muenster, 48129 Muenster, Germany.
65. deCODE Genetics, 101 Reykjavik, Iceland.
66. Faculty of Medicine, University of Iceland, 101 Reykjavik, Iceland.
67. Department of Human Genetics, McGill University, Montréal, Québec H3A 1B1, Canada.
68. A full list of members is provided in the Supplementary Note online of the original MIGN paper.
69. Genetics Division and Drug Discovery, GlaxoSmithKline, King of Prussia, Pennsylvania 19406, USA.

### **The PAGE Consortium**

Active PAGE investigators at the time of this analysis included:

**Coordinating Center:** Rutgers University, Piscataway, NJ: Tara Matise, Steve Buyske, Julia Higashio, Rasheeda Williams, Andrew Nato; University of Southern California, Los Angeles, CA: Jose Luis Ambite, Ewa Deelman.

**NHGRI:** Division of Genomic Medicine, NHGRI, NIH, Bethesda, MD: Teri Manolio, Lucia Hindorff.

**CALiCo:** University of North Carolina, Chapel Hill, NC: Kari E. North, Gerardo Heiss, Kira Taylor, Nora Franceschini, Christy Avery, Misa Graff, Danyu Lin, Miguel Quibrera; Baylor College of Medicine, Houston, TX: Barbara Cochran; Johns Hopkins Bloomberg School of Public Health, Baltimore, MD: Linda Kao; Penn Medical Lab, Washington DC: Jason Umans; SW Foundation for BioMedical Research, San Antonio, TX: Shelley Cole, Jean MacCluer; University of Alabama at Birmingham, Birmingham, AB: Sharina Person; University of Minnesota, Minneapolis, MN: James Pankow, Myron Gross; University of Texas Health Science Center, Houston: Eric Boerwinkle, Myriam Fornage; University of Vermont, Burlington, VT: Peter Durda, Nancy Jenny; University of Washington, Seattle, WA: Bruce Patsy, Alice Arnold, Petra Buzkova.

**EAGLE:** Vanderbilt University, Nashville, TN: Dana Crawford, Jonathan Haines, Deborah Murdock, Kim Glenn, Kristin Brown-Gentry, Tricia Thornton-Wells, Logan Dumitrescu, Janina Jeff, William S. Bush, Sabrina L. Mitchell, Robert Goodloe, Sarah Wilson, Jonathan Boston, Jennifer Malinowski, Nicole Restrepo, Matthew Oetjens, Jay Fowke, Wei Zheng; Heidelberg University, Tiffin, OH: Kylee Spencer; Pennsylvania State University, State College, PA: Marylyn Ritchie, Sarah Pendergrass.

**MEC:** University of Hawaii, Honolulu, HI: Loïc Le Marchand, Lynne Wilkens, Lani Park, Maarit Tiirikainen, Laurence Kolonel, Unhee Lim, Iona Cheng, Hansong Wang, Ralph Shohet; Keck School of Medicine, University of Southern California, Los Angeles, CA: Christopher Haiman, Daniel Stram, Brian Henderson, Kristine Monroe, Fredrick Schumacher.

**WHI:** Fred Hutchinson Cancer Research Institute (FHCR), Seattle, WA: Charles Kooperberg, Ulrike Peters, Garnet Anderson, Chris Carlson, Ross Prentice, Andrea LaCroix, Chunyuan Wu, Cara Carty, Jian Gong, Stephanie Rosse, Alicia Young, Jeff Haessler, Jonathan Kocarnik, Yi Lin; Ohio State Medical Center, Columbus, OH: Rebecca Jackson; Translational Genomic Science Institute (TGen): David Duggan; University of Pittsburgh, Pittsburgh, PA: Lew Kuller.
